# Supplementary material for: The evolution of ancestral and species-specific adaptations in snowfinches at the Qinghai–Tibet Plateau
Source: PubMed Central journal article supplement — Proc Natl Acad Sci U S A. 2021 Mar 22;118(13):e2012398118. doi: 10.1073/pnas.2012398118 (PMC8020664; doi:10.1073/pnas.2012398118), 2021-03-22
Supplement: pnas.2012398118.sapp.pdf [file pnas.2012398118.sapp.pdf]

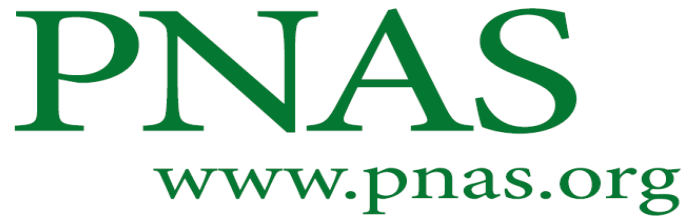

## Supplementary Information for

### The evolution of ancestral and species-specific adaptations in snowfinches at the Qinghai-Tibet Plateau

Yanhua Qu<sup>a,1,2</sup>, Chunhai Chen<sup>b,1</sup>, Xiumin Chen<sup>a,1</sup>, Yan Hao<sup>a,c,1</sup>, Huishang She<sup>a,c</sup>, Mengxia Wang<sup>a,c</sup>, Per G. P. Ericson<sup>d</sup>, Haiyan Lin<sup>a</sup>, Tianlong Cai<sup>a</sup>, Gang Song<sup>a</sup>, Chenxi Jia<sup>a</sup>, Chunyan Chen<sup>a</sup>, Hailin Zhang<sup>b</sup>, Jiang Li<sup>b</sup>, Liping Liang<sup>b</sup>, Tianyu Wu<sup>b</sup>, Jinyang Zhao<sup>b</sup>, Qiang Gao<sup>b</sup>, Guojie Zhang<sup>e,f,g,h</sup>, Weiwei Zhai<sup>a,g</sup>, Chi Zhang<sup>b,2</sup>, Yong E. Zhang<sup>a,c,g,i,2</sup>, and Fumin Lei<sup>a,c,g,2</sup>

<sup>a</sup>Key Laboratory of Zoological Systematics and Evolution, Institute of Zoology, Chinese Academy of Sciences, 100101 Beijing, China; <sup>b</sup>BGI Genomics, BGI-Shenzhen, 518084 Shenzhen, China; <sup>c</sup>College of life science, University of Chinese Academy of Sciences, 100049 Beijing, China; <sup>d</sup>Department of Bioinformatics and Genetics, Swedish Museum of Natural History, SE-104 05 Stockholm, Sweden; <sup>e</sup>BGI-Shenzhen, 518083 Shenzhen, China; <sup>f</sup>State Key Laboratory of Genetic Resources and Evolution, Kunming Institute of Zoology, Chinese Academy of Sciences, 650223 Kunming, China; <sup>g</sup>Center for Excellence in Animal Evolution and Genetics, Chinese Academy of Sciences, 650223 Kunming, China; <sup>h</sup>Section for Ecology and Evolution, Department of Biology, University of Copenhagen, DK-2100 Copenhagen, Denmark; and <sup>i</sup>Chinese Institute for Brain Research, 102206 Beijing, China.

<sup>1</sup>Y.Q., C.C., X.C., and Y.H. contributed equally to this work.

<sup>2</sup>To whom correspondence may be addressed. Email: quyh@ioz.ac.cn, zhangchi2@bgi.com, zhangyong@ioz.ac.cn, or leifm@ioz.ac.cn.

**This PDF file includes:**

Supplementary text 1-2

Figures S1 to S7

Tables S1 to S19

## Supplementary Information Text

### SI Text 1. Genome sequencing, assembly and annotation

#### Results

We prepared four (*rufico* and *adamsi*) and five (*taczan*) pair-end libraries spanning several insert sizes to generate short pair-end reads (*SI Appendix*, Table S1). A total 184.8, 181.2 and 201.3 Gb of sequencing data were generated, which provide a coverage  $171\times$ ,  $168\times$  and  $195\times$  with total assembly lengths of 1,037, 1,052 and 1,053 Mb for *taczan*, *rufico* and *adamsi*, respectively (*SI Appendix*, Table S1-S3). The genome sizes approximate to 1,027, 1,139 and 1,247 Mb estimated using 17-mer frequency method (*SI Appendix*, Table S2-S3 and Fig. S5). The contig N50 sizes are 665, 513 and 365 Kb, and scaffold N50 sizes are 9.07, 9.59 and 10.06 Mb for *taczan*, *rufico* and *adamsi*, respectively, with the largest scaffolds spanning 36.15, 32.22 and 34.21 Mb (*SI Appendix*, Table S3). BUSCO estimated that the assemblies of the three snowfinches contained 95% eukaryote\_odb9 BUSCO orthologues (*SI Appendix*, Table S9-11). Average guanine-cytosine (GC) contents of the three species of snowfinches (appr. 42%, *SI Appendix*, Fig. S6) are similar to those of the Eurasian Tree Sparrow, *Passer montanus* (*montan*) and the Zebra finch, *Taeniopygia guttata*. In addition, nearly 377 million transcriptomic reads from cardiac and flight muscles of *taczan* and *rufico* were generated to complement the genomic annotations (*SI Appendix*, Table S4).

We annotated the protein-coding genes by genome-wide search and homology prediction against the Repbase database (version 16.10). We found that 10.89%, 11.40% and 11.67% of *taczan*, *rufico* and *adamsi* genomes consisted of transposable element (TE) families (*SI Appendix*, Table S17), of which LINE elements were the most abundant (*SI Appendix*, Table S18 and Fig. S7). After masking the repetitive regions, we annotated the genes using a combinational method based on homology search, ab initio prediction, EST/cDNA evidences and direct mRNA sequencing evidence (*SI Appendix*, Table S4). This generated a total of 15,585, 15,206 and 15,136 protein-coding genes and 970, 1,175 and 940 non-coding RNA genes for *taczan*, *rufico* and *adamsi*, respectively (*SI Appendix*, Tables S7 and S19). Of the protein-coding genes, 99.80 % have homolog in the protein databases (including Swissprot, TrEMBL, InterPro, KEGG and GO databases, *SI Appendix*, Table S8). BUSCO analysis showed that gene-sets of the three species of snowfinches contain about 94.1% (*taczan*), 90.4% (*rufico*) and 89.8% (*adamsi*) complete eukaryote\_odb9 BUSCO orthologues (*SI Appendix*, Table S9-11).

## Methods and materials

### *Whole genome sequencing*

DNA was extracted from muscle using the Qiagen DNeasy Blood and Tissue Kit under the protocol provided by the manufacturer. The genomic DNA was sequenced by Illumina HiSeq2000 sequencing platform. Libraries with different insert sizes were constructed at BGI-Shenzhen. To facilitate the assembly of the genome, we constructed different short-insert (170 bp, 500 bp and 800 bp) and mate-pair (2 Kb and 5 Kb) libraries (*SI Appendix*, Table S1). We assembled the genome using SOAPdenovo (1) and SSPACE (2). The genomes were assembled via four steps: constructing contigs, constructing scaffolds, filling gaps and constructing super-scaffolds. Short insert libraries were split to construct de Bruijn graph, which was then simplified by removing tips, merging bubbles and solving repeats to get contigs. All clean reads were mapped onto the contigs to construct scaffolds. Subsequently, the clean data from short-insert size libraries were used to fill gaps. Finally, all clean reads were mapped onto the scaffolds to construct super-scaffolds by SSPACE. We used 17-mer to estimate the genome sizes of the three snowfinches. The genome size was estimated to be 1,027 Mb for *taczan*, 1,139Mb for *rufico* and 1,247Mb for *adamsi* (*SI Appendix*, Table S2). Assembly quality and completeness were assessed by checking Benchmarking Universal Single-Copy Orthologs v2 (BUSCO, aves\_odb9, 3) and ESTs evidence. The final contig and scaffold sizes, N50 and N90, were calculated based on the minimum length of sequence. The sequencing coverage, depth and GC content of the assembled genomes were evaluated by mapping all sequencing reads of the short-insert-sized libraries back to the scaffolds using BWA (4).

### *Genome annotation*

Tandem repeats were searched across the genome using Tandem Repeats Finder software (version 4.04, <http://tandem.bu.edu/trf/trf.html>). Transposable elements (TE) were identified in the genomes by a combination of homology-based and *de novo* approaches. We used *de novo* gene prediction, homology-based methods and RNA-seq data to identify protein-coding genes of the three species of snowfinches. For the homology-based prediction, all available protein sequences of Eurasian Tree Sparrow (*Passer montan*), Medium Ground Finch (*Geospiza fortis*), Zebra Finch (*Taeniopygia guttata*), Collared Flycatcher (*Ficedula albicollis*), Ground Tit (*Parus humilis*), American crow (*Corvus brachyrhynchos*), Golden-collared Manakin (*Manacus vitellinus*), were downloaded from Ensembl (release 64) and NCBI. We mapped them into genomes of three species of snowfinches using TblastN (5). Homologous sequences were aligned

with matched proteins using Genewise (6) to define gene models. Augustus was used to predict coding genes. For RNA-seq based prediction, we mapped transcriptomic reads to the assembled genomes using HISAT (hisat2-2.0.1-beta, 7). We combined HISAT mapping results and applied StringTie (8) to predict transcript structures. We used Glean (9) to integrate all predicted gene structures. We *de novo* predicted the tRNA genes using tRNAscan-SE software, with eukaryote parameters on the repeat pre-masked genome. We identified rRNA fragments by aligning the rRNA sequences using BlastN at E-value  $1e^{-5}$ . The snRNA and miRNA were searched by aligning and searching INFERNAL (version 0.81) against Rfam database (release 9.1).

#### *Gene functional annotation*

We annotated gene functions using Blastp based on the highest match to proteins in the SwissProt and TrEMBL databases (Uniprot release 2011-01). The motifs and domains in the protein-coding genes were determined by InterProScan (version 4.7). Gene Ontology (10) IDs for genes were obtained from the corresponding InterPro entry. All genes were aligned against KEGG database (11, Release 58).

#### *Construction of gene families*

We blasted and aligned all sequences of protein-coding genes from three snowfinches and seven other species using TreeFam (12) with an E-value threshold set as  $1e^{-7}$  (Blastp). Solar was used to concatenate high-scoring pair segments of each protein pair and custom-scripts were applied to compute H-scores to evaluate the similarity among genes based on Bit-scores. We searched gene families by clustering of homologous gene sequences (minimum edge weight, 10; minimum edge density between a join for hierarchical clustering, 0.34; maximum size for hierarchical clustering, 500; breaking edge density: 0.1) using Hcluster\_sg (Version 0.5.0). Then we searched single copy orthologous genes and obtained 784 genes, which were subsequently used for phylogenetic reconstruction.

## SI Text 2. Functional experiment of snowfinch *DTLs* in response to UV irradiation

### *Cell culture, knockdown of endogenous DTL using lentivirus-delivered shRNAs and establishment of stable cell lines expressing DTLs*

Great Tit embryo fibroblast (GEF) cells (the closest species from which the cell line was derived) were cultured in high glucose Dulbecco's Modified Eagle's medium supplemented with 10% fetal bovine serum, 100 units/ml penicillin and 100 µg/ml streptomycin at 37 °C with 5% CO<sub>2</sub>. Sequence of shRNA (5'-GCACCAGCAAGCTCATCTTTA-3') targeting *DTL* was cloned into the pLVX-shRNA1 vector (Huaaobio, Beijing, China). The shRNAs were packaged into lentiviruses by co-transfecting with psPAX2 and pMD2.G plasmids (Huaaobio, China) into 293T cells. Forty-eight hours after transfection, the supernatant was collected to infect the GEF cells, which were subsequently subjected to puromycin selection to obtain a stable *DTL*-knockdown cell line (Fig. S1A).

*DTL* sequences of the three snowfinches (*taczan*, *rufico* and *adamsi*), the *ancestor* and the Eurasian Tree Sparrow (*montan*) were cloned into the pCDH-CMV-MCS-EF1-copGFP vector (Huaaobio, China) separately. These individual vector plasmids, along with psPAX2 and pMD2.G (Huaaobio, China), were co-transfected into packaging 293T cells for forty-eight hours. Infectious lentiviruses in the supernatant were collected to transduce the *DTL*-knockdown GEF cells for another 48 hours. Cells were sorted using fluorescence-activated cell sorting (FACS), colonized and verified by western blot analysis of protein expression of *DTL* constructs (*DTL<sub>rufico</sub>*, *DTL<sub>adamsi</sub>*, *DTL<sub>taczan</sub>*, *DTL<sub>ancestor</sub>* and *DTL<sub>montan</sub>*, Fig. S1B and C).

### *DNA damage determination by slot blot assay of pyrimidine (6-4) pyrimidone photoproducts (6-4PP) and cyclobutane pyrimidine dimers (CPD)*

GEF cells were irradiated with UVB at 100 J/m<sup>2</sup> for 2 min, and were subsequently harvested at 0, 1.5 and 6 h post-UVB for 6-4PP quantitation and 0, 6 and 24 h post-UVB for CPD assay, respectively. We used a slot blot assay to determine 6-4PP and CPD levels as described previously (13). Equal amounts of genomic DNAs extracted from cells expressing *DTL<sub>taczan</sub>*, *DTL<sub>rufico</sub>*, *DTL<sub>adamsi</sub>*, *DTL<sub>ancestor</sub>* and *DTL<sub>montan</sub>* were denatured at 95 °C for 10 min and spotted on nitrocellulose membranes. After being baked at UV-light cross-linker (254 nm) for 10 min, the membranes were blocked in 5% BSA in PBS containing 0.5% Tween 20 for 1 h at room temperature, incubated with anti-CPD antibody (232202, Cell Biolabs, Inc. San Diego, USA) or anti-6-4PP antibody (232301, Cell Biolabs) at a 1:1000 dilution at 4 °C overnight, washed and

incubated with horseradish peroxidase (HRP)-conjugated secondary antibodies. Signals were developed using an enhanced chemiluminescence (ECL) detection system (Thermo Scientific, USA). To determine DNA repair kinetics, percentage (%) repair was calculated by measuring quantitative densities of the bands at specified times and comparing to that at zero time point, which was defined as the presence of 100% damage after UV exposure.

#### *Western blotting analysis*

Cells were harvested, rinsed twice with PBS, lysed in a denaturing lysis buffer containing protease inhibitors (total protein extraction kit, KeyGen Biotech, Nanjing, China) for 30 min on ice, and centrifuged (12,000 rpm) for 15 min at 4 °C. Protein concentration of the lysates was determined using a BCA protein assay kit (Vazyme Biotech, Nanjing, China). Proteins were separated on an 8% sodium dodecyl sulfide-polyacrylamide gel and transferred to a polyvinylidene fluoride membrane (Merck Millipore). Blots were blocked using 5% non-fat dried milk in Tris-buffered saline with 0.1% Tween 20 (pH 7.6) for 1 h at room temperature and then incubated with antibodies against *DTL* (1:200, Thermofisher, PA542842) or  $\beta$ -actin (1:1000, Sigma, A2228) overnight at 4 °C. Immunoreactive proteins were further detected with HRP-conjugated secondary antibodies and a detection system as described above.

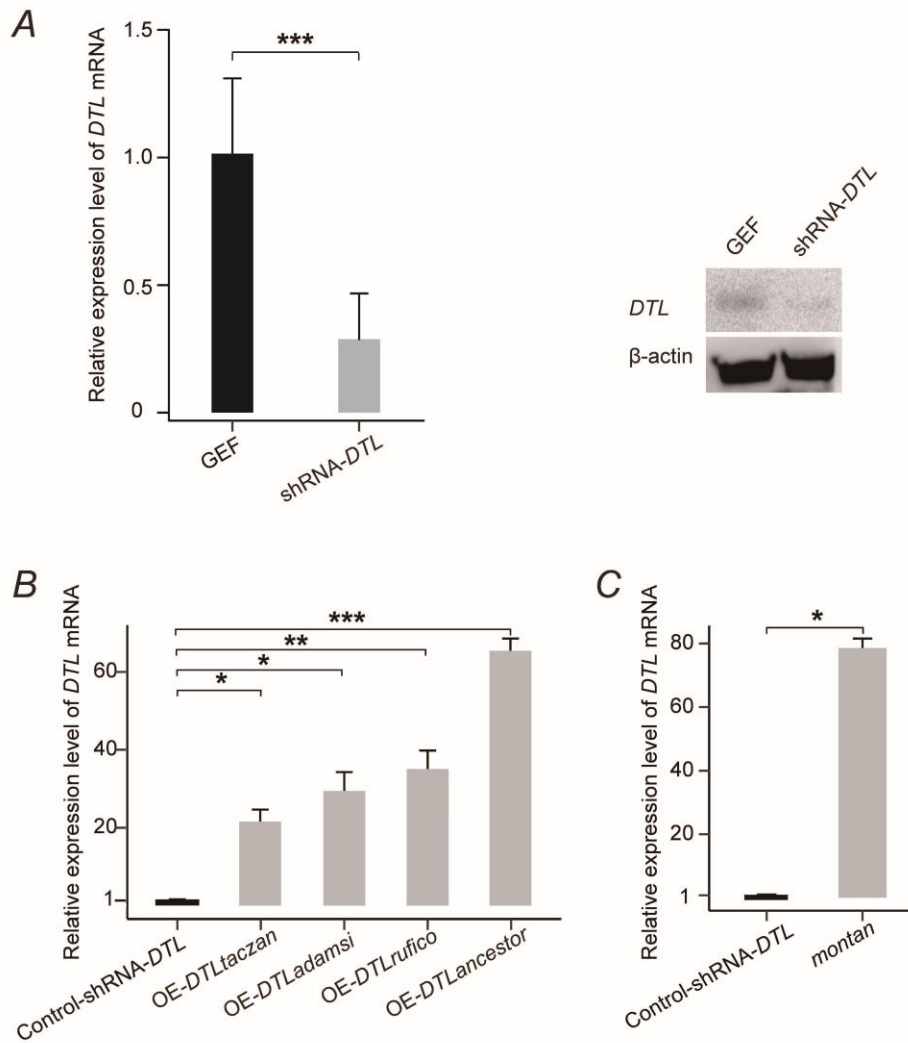

Fig. S1. A, Q-PCR and western blot showed that shRNA *DTL* has reduced endogenous *DTL* mRNA and protein expression in embryonic fibroblasts of the Great tit (GEF) cells. (B) and (C) Q-PCR shows mRNA expression levels of overexpressed (OE) *DTL<sub>taczan</sub>*, *DTL<sub>rufico</sub>*, *DTL<sub>adamsi</sub>*, *DTL<sub>ancestor</sub>* and *DTL<sub>montan</sub>* are significantly higher than that of the control shRNA *DTL*. Note, snowfinch *DTL*s and *DTL<sub>montan</sub>* are amplified by different primers thus they are shown separately. T-tests are used for statistical comparisons. \*,  $P < 0.05$ ; \*\*,  $P < 0.01$ , \*\*\*,  $P < 0.001$ .

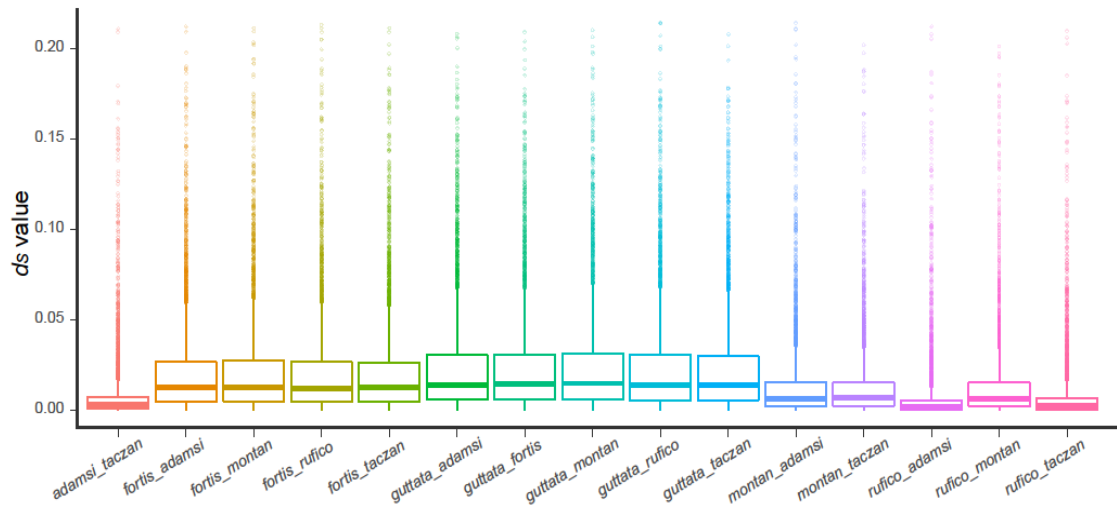

Fig. S2. The median pairwise  $d_s$  values of 6,572 genes used for positive selection analyses ranged from 0.002 (i.e., *adamsi* and *rufico*) to 0.015 (i.e., *montan* and *guttata*). *fortis*, Medium Ground Finch (*Geospiza fortis*); *guttata*, Zebra finch (*Taeniopygia guttata*); *rufico*, Rufous-necked Snowfinch (*Pyrgilauda ruficollis*); *adamsi*, the Black-winged Snowfinch (*Montifringilla adamsi*); *taczan*, White-rumped Snowfinch (*Onychostruthus taczanowskii*); *montan*, Eurasian Tree Sparrow (*Passer montanus*).



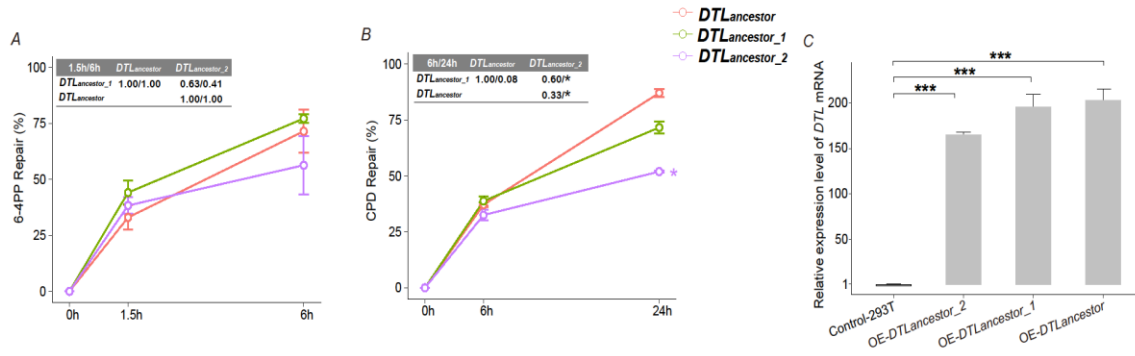

Fig.S3. The functional assays of the three ancestral *DTL* sequences using 293T cell line. *A*, pyrimidine (6-4) pyrimidone photoproduct (6-4PP), *B*, cyclobutane pyrimidine dimers (CPD). Pairwise T-tests and Bonferroni-Holm correction are used for statistical comparisons. \*,  $P < 0.05$ . Three ancestral *DTL* sequences displayed similar repair capacities of DNA damage at all checking time points in 6-4PP and CPD assays, except that the *DTL*<sub>ancestor\_2</sub> (the least likely ancestral sequence) shows lower repair capacity than those of other ancestral sequences at the 24h time point of CPD assay. Note, the repair capacities of the ancestral *DTL*s using 293T cell line (this figure) are slightly lower than the repair capacities of the ancestral *DTL*s using embryo fibroblast cells of the Great Tit (Fig. 3). *C*, Q-PCR shows mRNA expression levels of overexpressed (OE) *DTL*<sub>ancestors</sub>. *DTL*<sub>ancestor\_1</sub> and *DTL*<sub>ancestor\_2</sub> are significantly higher than that of the control 293T. T-tests are used for statistical comparisons. \*\*\*,  $P < 0.001$ .

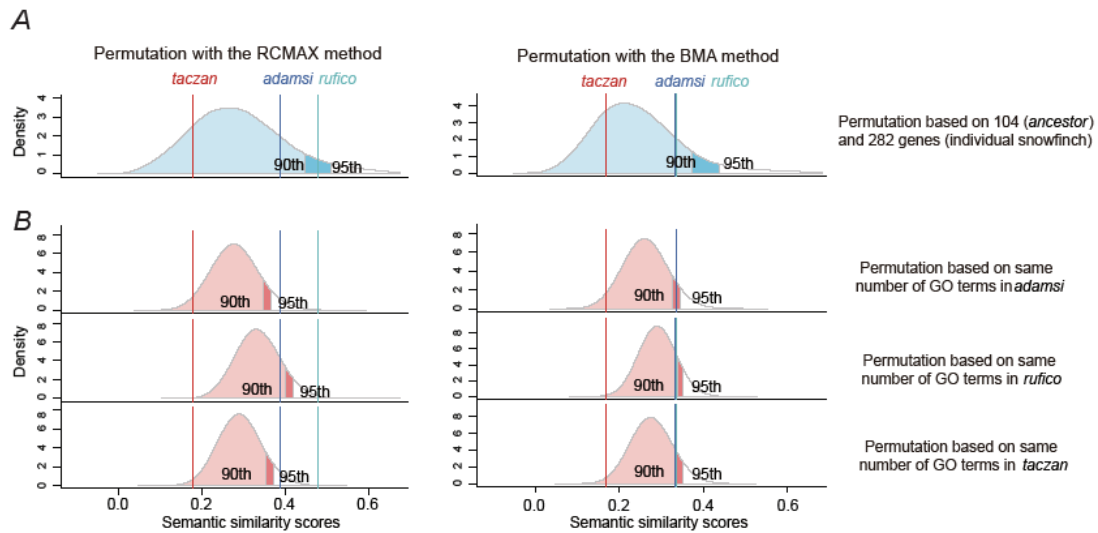

Fig. S4. A) and B) The observed and permuted semantic similarity scores based on a more stringent dataset with the empirical GO terms of  $P < 0.005$  and enrichment scores  $> 2$ . Both RCMAX (left) and BMA (right) measures were used for pairwise comparisons between *ancestor* and each of the descendant snowfinches. Dark blue, light blue and red vertical lines show the observed pairwise semantic similarity values between *ancestor* and each of the snowfinches (*adamsi*, *rufico* and *taczan*, respectively). Blue (permutation based on same number of genes) and red shades (permutation based on same number of GO terms) show the 10,000 permuted semantic similarity values and 95<sup>th</sup> and 90<sup>th</sup> percentiles are indicated.

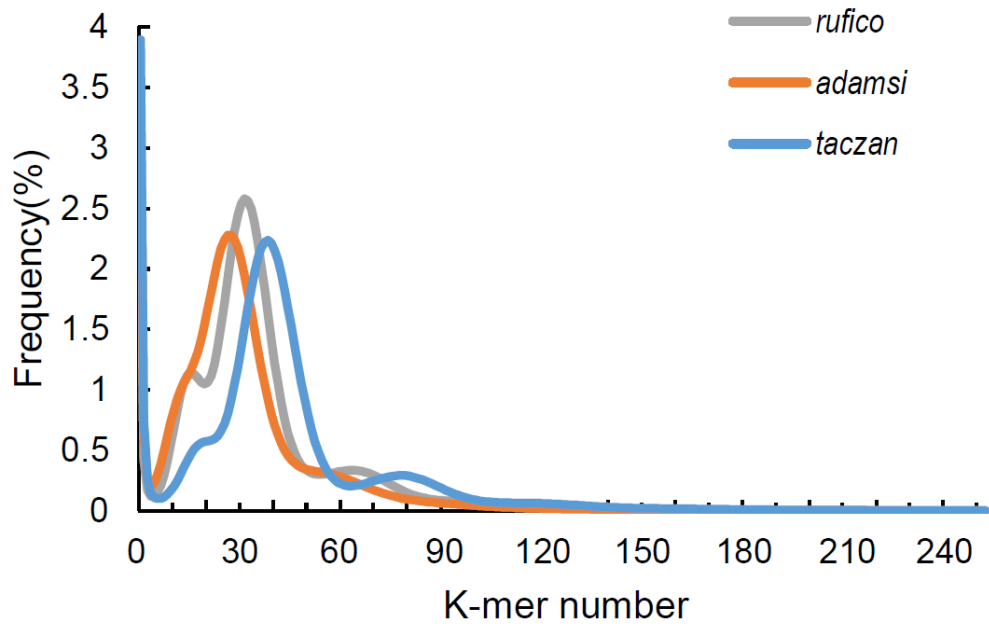

Fig. S5. K-mer frequency distributions of the three species of snowfinches. Frequency of each K-mer in raw sequencing reads was calculated, and here  $K=17$ . White-rumped Snowfinch (*taczan*). Rufous-necked Snowfinch (*rufico*). Black-winged Snowfinch (*adamsi*).

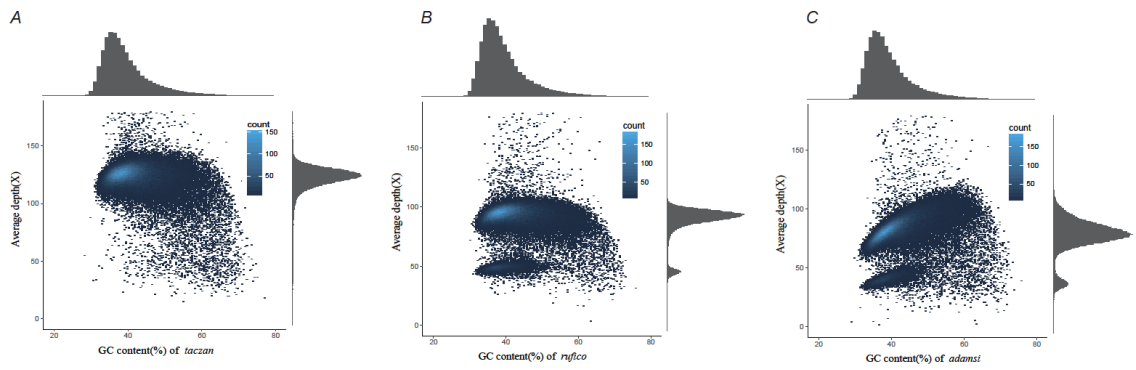

Fig. S6. Depth and GC contents of assembled genomes of three snowfinches. *A*) White-rumped Snowfinch (*taczan*). *B*) Rufous-necked Snowfinch (*rufico*). *C*) Black-winged Snowfinch (*adamsi*).

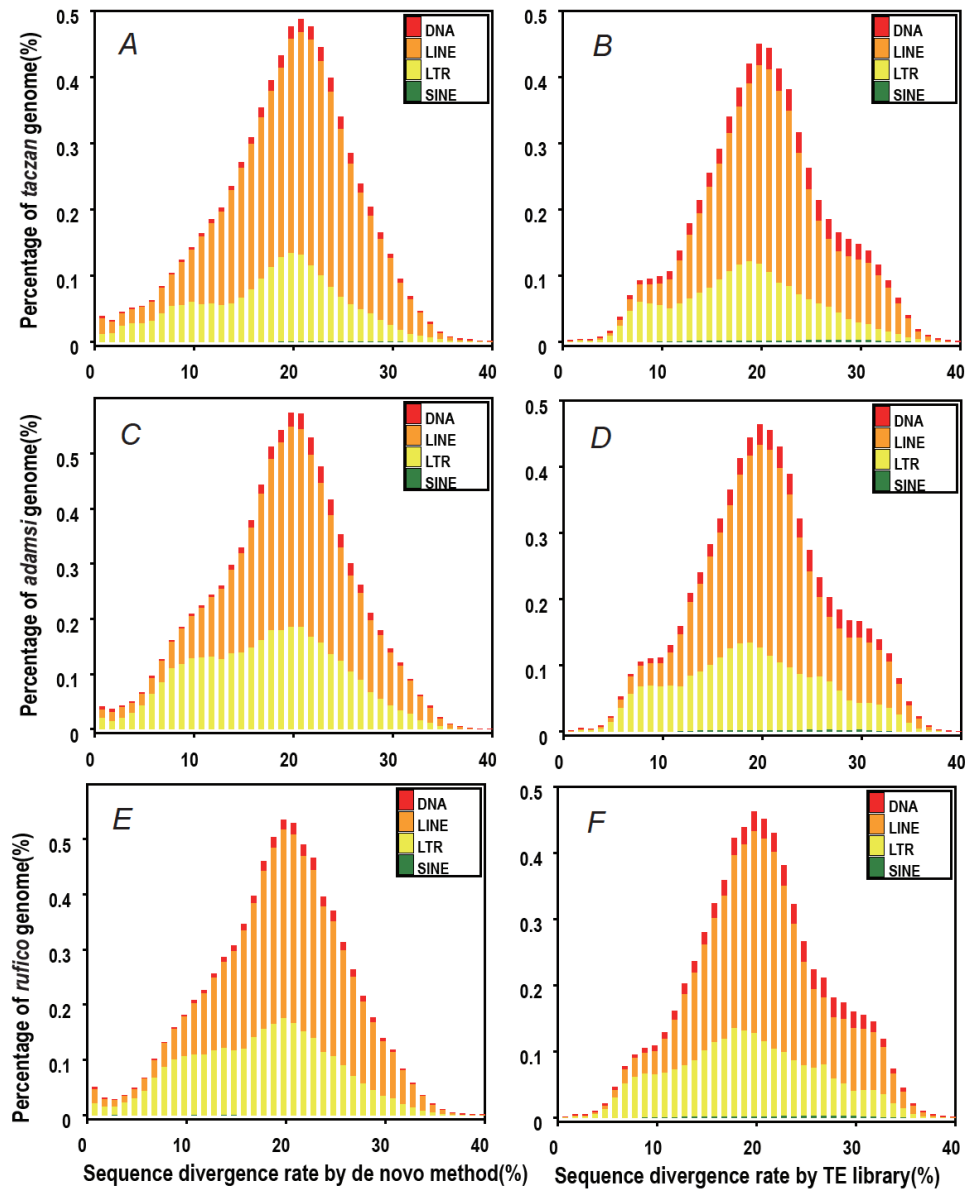

Fig. S7. Transposable elements in the genomes of the three species of snowfinches. *A*) and *B*) White-rumped Snowfinch (*taczan*). *C*) and *D*) Rufous-necked Snowfinch (*rufico*). *E*) and *F*) Black-winged Snowfinch (*adamsi*).

## Tables S1 to S19

Table S1. Summary of DNA libraries and sequencing data of the genomes of the three species of snowfinches.

| Pair-end libraries             | Insert size | Read length | Total Raw data (G) | Total Clean Raw data (G) | Raw Sequence coverage (×) | Clean Sequence coverage (×) |
|--------------------------------|-------------|-------------|--------------------|--------------------------|---------------------------|-----------------------------|
| <b>White-rumped Snowfinch</b>  |             |             |                    |                          |                           |                             |
| Illumina reads                 | 170bp       | 90_90       | 70.31              | 62.25                    | 65.10                     | 57.64                       |
|                                | 500bp       | 90_90       | 71.46              | 62.12                    | 66.17                     | 57.52                       |
|                                | 800bp       | 90_90       | 14.41              | 11.57                    | 13.34                     | 10.71                       |
|                                | 2Kb         | 49_49       | 14.99              | 9.31                     | 13.88                     | 8.62                        |
|                                | 5Kb         | 49_49       | 13.63              | 7.38                     | 12.62                     | 6.84                        |
|                                | Total       |             |                    | 184.8                    | 152.63                    | 171.11                      |
| <b>Rufous-necked Snowfinch</b> |             |             |                    |                          |                           |                             |
| Illumina reads                 | 170bp       | 90_90       | 33.04              | 33.84                    | 30.59                     | 31.33                       |
|                                | 170bp       | 100_100     | 38.44              | 33.32                    | 35.59                     | 30.85                       |
|                                | 500bp       | 90_90       | 22.61              | 19.92                    | 20.94                     | 18.45                       |
|                                | 500bp       | 100_100     | 16.77              | 11.69                    | 15.53                     | 10.82                       |
|                                | 2Kb         | 49_49       | 17.68              | 11.41                    | 16.37                     | 10.56                       |
|                                | 5Kb         | 49_49       | 52.64              | 8.36                     | 48.74                     | 7.74                        |
| Total                          |             |             | 181.18             | 118.54                   | 167.76                    | 109.75                      |
| <b>Black-winged Snowfinch</b>  |             |             |                    |                          |                           |                             |
| Illumina reads                 | 170bp       | 90_90       | 86.49              | 79.26                    | 80.08                     | 73.39                       |
|                                | 500bp       | 90_90       | 51.76              | 43.05                    | 47.93                     | 39.86                       |
|                                | 2Kb         | 49_49       | 21.07              | 10.67                    | 19.51                     | 9.88                        |
|                                | 5Kb         | 49_49       | 51.01              | 6.79                     | 47.23                     | 6.28                        |
| Total                          |             |             | 210.33             | 139.77                   | 194.75                    | 129.41                      |

Table S2. Estimated genome sizes with 17Kmer analyses of the three species of snowfinches.

| Species                 | K-mer num      | Peak depth | Genome size (M) | Used Bases (M) | Used Reads | Depth (×) |
|-------------------------|----------------|------------|-----------------|----------------|------------|-----------|
| White-rumped Snowfinch  | 45,205,593,822 | 44         | 1,027           | 54,979         | 610        | 54        |
| Rufous-necked Snowfinch | 37,617,471,614 | 33         | 1,139           | 45,750         | 508        | 40        |
| Black-winged Snowfinch  | 36,170,174,804 | 29         | 1,247           | 43,991         | 488        | 35        |

Table S3. Statistics of the genomes of the three species of snowfinches.

| Species                        | Contig        |        | Scaffold      |        |
|--------------------------------|---------------|--------|---------------|--------|
|                                | Length(bp)    | number | Length(bp)    | Number |
| <b>White-rumped Snowfinch</b>  |               |        |               |        |
| Total_length                   | 1,035,689,888 |        | 1,037,660,651 |        |
| Max_len                        | 3,967,782     |        | 36,148,806    |        |
| number>=100bp                  |               | 47,857 |               | 43,017 |
| number>=2000bp                 |               | 5,267  |               | 1,862  |
| N50                            | 665,102       | 448    | 9,074,114     | 33     |
| N60                            | 520,661       | 626    | 7,349,975     | 46     |
| N70                            | 394,256       | 855    | 5,579,808     | 62     |
| N80                            | 261,243       | 1,174  | 3,518,719     | 84     |
| N90                            | 143,484       | 1,700  | 1,314,334     | 133    |
| <b>Rufous-necked Snowfinch</b> |               |        |               |        |
| Total_length                   | 1,049,655,789 |        | 1,051,766,259 |        |
| Max_len                        | 3,566,990     |        | 32,219,291    |        |
| number>=100bp                  |               | 76,850 |               | 71,334 |
| number>=2000bp                 |               | 6,900  |               | 3,177  |
| N50                            | 513,765       | 561    | 9,593,645     | 35     |
| N60                            | 397,425       | 793    | 7,010,658     | 47     |
| N70                            | 289,630       | 1,101  | 4,556,229     | 66     |
| N80                            | 194,731       | 1,538  | 2,104,769     | 100    |
| N90                            | 92,707        | 2,293  | 841,176       | 177    |
| <b>Black-winged Snowfinch</b>  |               |        |               |        |
| Total_length                   | 1,049,590,203 |        | 1,053,015,869 |        |
| Max_len                        | 2,075,544     |        | 34,205,674    |        |
| number>=100bp                  |               | 69,209 |               | 60,645 |
| number>=2000bp                 |               | 8,430  |               | 2,539  |
| N50                            | 365,380       | 837    | 10,056,867    | 31     |
| N60                            | 278,797       | 1,168  | 7,630,653     | 43     |
| N70                            | 200,896       | 1,610  | 5,275,940     | 59     |
| N80                            | 135,910       | 2,243  | 3,090,561     | 85     |
| N90                            | 68,106        | 3,299  | 1,072,163     | 142    |



Table S4. Statistics of transcriptome sequencing data.

| Species                 | Tissue           | Clean reads | Mapped reads | Percent mapped to genome (%) |
|-------------------------|------------------|-------------|--------------|------------------------------|
| White-rumped Snowfinch  | Cardiac muscle_2 | 47,196,092  | 44,515,354   | 94.32%                       |
|                         | Cardiac muscle_2 | 47,133,300  | 44,441,989   | 94.29%                       |
|                         | Flight muscle_1  | 46,924,968  | 42,795,571   | 91.20%                       |
| Rufous-necked Snowfinch | Flight muscle_2  | 47,184,114  | 43,466,006   | 92.12%                       |
|                         | Cardiac muscle_1 | 47,298,618  | 43,450,237   | 92.14%                       |
|                         | Cardiac_muscle_2 | 47,156,758  | 43,037,013   | 90.99%                       |
|                         | Flight muscle_1  | 46,750,206  | 42,100,481   | 89.69%                       |
|                         | Flight muscle_2  | 46,939,994  | 41,140,181   | 88.00%                       |

Table S5. Summary of gene annotation models. P, *ab initio* prediction; H, homology-based; C, cDNA/EST/RNA expressed genes. Single, supported by only one method; more, supported by more than one method.

| Evidence                | ≥20% overlap |            | ≥50% overlap |            | ≥80% overlap |            |
|-------------------------|--------------|------------|--------------|------------|--------------|------------|
|                         | Number       | % of total | Number       | % of total | Number       | % of total |
| White-rumped Snowfinch  |              |            |              |            |              |            |
| C(single)               |              | 0          | 17           | 0.11       | 48           | 0.31       |
| C(more)                 |              | 0          |              | 0          |              | 0          |
| H(single)               |              | 0          | 74           | 0.47       | 407          | 2.61       |
| H(more)                 | 564          | 3.62       | 814          | 5.22       | 1,865        | 11.97      |
| P(single)               |              | 0          | 112          | 0.72       | 721          | 4.63       |
| P(more)                 |              | 0          |              | 0          |              | 0          |
| HC                      | 264          | 1.69       | 315          | 2.02       | 608          | 3.90       |
| PC                      | 16           | 0.10       | 28           | 0.18       | 78           | 0.50       |
| PH                      | 9,489        | 60.89      | 10,206       | 65.49      | 8,665        | 55.60      |
| PHC                     | 5,252        | 33.70      | 3,911        | 25.09      | 2,475        | 15.88      |
| Rufous-necked Snowfinch |              |            |              |            |              |            |
| C(single)               |              | 0.00       | 38           | 0.25       | 118          | 0.78       |
| C(more)                 |              | 0.00       |              | 0.00       |              | 0.00       |
| H(single)               |              | 0.00       | 55           | 0.36       | 345          | 2.27       |
| H(more)                 | 519          | 3.41       | 654          | 4.30       | 1,333        | 8.77       |
| P(single)               |              | 0.00       | 99           | 0.65       | 681          | 4.48       |
| P(more)                 |              | 0.00       |              | 0.00       |              | 0.00       |
| HC                      | 251          | 1.65       | 259          | 1.70       | 588          | 3.87       |
| PC                      | 34           | 0.22       | 53           | 0.35       | 123          | 0.81       |
| PH                      | 9,011        | 59.26      | 9,728        | 63.97      | 8,508        | 55.95      |
| PHC                     | 5,391        | 35.45      | 4,235        | 27.85      | 2,912        | 19.15      |
| Black-winged Snowfinch  |              |            |              |            |              |            |
| H(single)               |              | 0          | 61           | 0.40       | 378          | 2.50       |
| H(more)                 | 670          | 4.43       | 795          | 5.25       | 1,689        | 11.16      |
| P(single)               |              | 0          | 120          | 0.79       | 814          | 5.38       |
| P(more)                 |              | 0          |              | 0          |              | 0          |
| PH                      | 14,466       | 95.57      | 14,068       | 92.94      | 11,635       | 76.87      |

Table S6. Summary of predicted protein-coding genes and their characteristics.

| Gene set                       | Number | Average gene length (bp) | Average CDS length (bp) | Average exons per gene | Average exon length (bp) | Average intron length (bp) |
|--------------------------------|--------|--------------------------|-------------------------|------------------------|--------------------------|----------------------------|
| <b>White-rumped Snowfinch</b>  |        |                          |                         |                        |                          |                            |
| <i>De Novo</i> Augustus        | 20,109 | 14,529                   | 1,354                   | 8                      | 177                      | 1,986                      |
| <i>Homolog</i> Rock            | 17,074 | 16,295                   | 1,335                   | 8                      | 170                      | 2,180                      |
| Pigeon                         |        |                          |                         |                        |                          |                            |
| American crow                  | 16,929 | 16,080                   | 1,309                   | 8                      | 168                      | 2,175                      |
| Saker                          | 16,720 | 15,207                   | 1,411                   | 8                      | 179                      | 2,005                      |
| Falcon                         |        |                          |                         |                        |                          |                            |
| Medium Ground Finch            | 17,465 | 16,008                   | 1,309                   | 8                      | 167                      | 2,156                      |
| Golden-collared manakin        | 16,699 | 16,442                   | 1,331                   | 8                      | 168                      | 2,189                      |
| Wild Turkey                    | 14,853 | 17,427                   | 1,497                   | 9                      | 173                      | 2,079                      |
| Ground Tit                     | 18,246 | 16,312                   | 1,317                   | 8                      | 170                      | 2,219                      |
| Zebra finch                    | 16,466 | 17,793                   | 1,388                   | 8                      | 168                      | 2,260                      |
| <i>GLEAN</i>                   | 14,262 | 15,893                   | 1,558                   | 9                      | 183                      | 1,903                      |
| Final set                      | 15,585 | 20,543                   | 1,662                   | 9                      | 180                      | 2,275                      |
| <b>Rufous-necked Snowfinch</b> |        |                          |                         |                        |                          |                            |
| <i>De Novo</i> Augustus        | 16,764 | 20,913                   | 1,579                   | 9                      | 171                      | 2,347                      |
| <i>Homolog</i> Rock            | 17,319 | 15,965                   | 1,318                   | 8                      | 170                      | 2,167                      |
| Pigeon                         |        |                          |                         |                        |                          |                            |
| American crow                  | 17,331 | 15,674                   | 1,287                   | 8                      | 169                      | 2,168                      |
| Saker                          | 16,985 | 14,929                   | 1,391                   | 8                      | 179                      | 2,002                      |
| Falcon                         |        |                          |                         |                        |                          |                            |
| Medium Ground Finch            | 18,076 | 15,414                   | 1,281                   | 8                      | 169                      | 2,144                      |
| Golden-collared manakin        | 16,987 | 16,057                   | 1,314                   | 8                      | 169                      | 2,173                      |
| Wild Turkey                    | 15,338 | 17,009                   | 1,474                   | 9                      | 173                      | 2,067                      |
| Ground Tit                     | 18,579 | 16,011                   | 1,298                   | 8                      | 170                      | 2,221                      |
| Zebra finch                    | 16,791 | 17,444                   | 1,366                   | 8                      | 168                      | 2,258                      |
| <i>GLEAN</i>                   | 13,835 | 16,561                   | 1,679                   | 9                      | 179                      | 1,916                      |
| Final set                      | 15,206 | 21,249                   | 1,680                   | 9                      | 179                      | 2,303                      |

---

| Black-winged Snowfinch |                 |        |        |       |   |     |       |
|------------------------|-----------------|--------|--------|-------|---|-----|-------|
| <i>De Novo</i>         | <i>Augustus</i> | 16,774 | 20,984 | 1,601 | 9 | 171 | 2,323 |
| <i>Homolog</i>         | Rock            | 17,215 | 16,151 | 1,332 | 8 | 170 | 2,168 |
|                        | Pigeon          |        |        |       |   |     |       |
|                        | American        | 17,246 | 15,874 | 1,299 | 8 | 168 | 2,172 |
|                        | crow            |        |        |       |   |     |       |
|                        | Saker           | 16,879 | 15,135 | 1,407 | 8 | 179 | 2,006 |
|                        | Falcon          |        |        |       |   |     |       |
|                        | Medium          | 17,938 | 15,580 | 1,294 | 8 | 168 | 2,139 |
|                        | Ground          |        |        |       |   |     |       |
|                        | Finch           |        |        |       |   |     |       |
|                        | Golden-         | 16,929 | 16,185 | 1,325 | 8 | 169 | 2,170 |
|                        | collared        |        |        |       |   |     |       |
|                        | manakin         |        |        |       |   |     |       |
|                        | Wild            | 15,207 | 17,289 | 1,493 | 9 | 173 | 2,068 |
|                        | Turkey          |        |        |       |   |     |       |
|                        | Ground Tit      | 18,482 | 16,154 | 1,313 | 8 | 170 | 2,206 |
|                        | Zebra finch     | 16,622 | 17,643 | 1,382 | 8 | 168 | 2,249 |
|                        | <i>GLEAN</i>    | 13,820 | 16,667 | 1,587 | 9 | 179 | 1,918 |
|                        | Final set       | 15,136 | 20,703 | 1,686 | 9 | 180 | 2,272 |

---

Table S7. Orthologous genes in the three species of snowfinches and other seven birds.

| Species                 | Total gene number | Ortholog number |
|-------------------------|-------------------|-----------------|
| White-rumped Snowfinch  | 15,585            | 15,259          |
| Rufous-necked Snowfinch | 15,206            | 14,994          |
| Black-winged Snowfinch  | 15,136            | 14,932          |
| Eurasian Tree Sparrow   | 16,925            | 16,210          |
| Medium Ground Finch     | 14,503            | 14,460          |
| Collared Flycatcher     | 15,969            | 15,408          |
| Zebra Finch             | 17,470            | 16,820          |
| Ground Tit              | 16,144            | 15,864          |
| American Crow           | 15,374            | 14,764          |
| Golden-collared Manakin | 14,412            | 10,863          |

Table S8. Functional classification of genes of the three species of snowfinches using different databases.

|             | White-rumped Snowfinch |             | Black-winged Snowfinch |             | Rufous-necked Snowfinch |             |
|-------------|------------------------|-------------|------------------------|-------------|-------------------------|-------------|
|             | Number                 | Percent (%) | Number                 | Percent (%) | Number                  | Percent (%) |
| Total       | 15,585                 |             | 15,136                 |             | 15,206                  |             |
| Nr          | 15,544                 | 99.74       | 15,125                 | 99.93       | 15,167                  | 99.74       |
| Swissprot   | 15,133                 | 97.10       | 14,715                 | 97.22       | 14,720                  | 96.80       |
| KEGG        | 13,609                 | 87.32       | 13,148                 | 86.87       | 13,246                  | 87.11       |
| TrEMBL      | 15,517                 | 99.56       | 15,102                 | 99.78       | 15,135                  | 99.53       |
| InterPro    | 15,086                 | 96.80       | 14,704                 | 97.15       | 14,698                  | 96.66       |
| GO          | 11,227                 | 72.04       | 10,978                 | 72.53       | 10,945                  | 71.97       |
| Annotated   | 15,554                 | 99.80       | 15,132                 | 99.97       | 15,176                  | 99.80       |
| Unannotated | 31                     | 0.20        | 4                      | 0.03        | 30                      | 0.20        |

Table S9. Completeness of the genome assemblies of the snowfinches evaluated by BUSCO.

| BUSCO benchmark             | White-rumped Snowfinch |                | Rufous-necked Snowfinch |                | Black-winged Snowfinch |                |
|-----------------------------|------------------------|----------------|-------------------------|----------------|------------------------|----------------|
|                             | Number                 | Percentage (%) | Number                  | Percentage (%) | Number                 | Percentage (%) |
| Total BUSCO groups searched | 4915                   |                | 4915                    |                | 4915                   |                |
| Complete single-copy BUSCOs | 4627                   | 94.1           | 4616                    | 93.9           | 4618                   | 94             |
| Complete duplicated BUSCOs  | 56                     | 1.1            | 53                      | 1.1            | 59                     | 1.2            |
| Fragmented BUSCOs           | 143                    | 2.9            | 151                     | 3.1            | 140                    | 2.8            |
| Missing BUSCOs              | 89                     | 1.9            | 95                      | 1.9            | 98                     | 2              |

Note: BUSCO version is: 2.0. The lineage dataset is: aves\_odb9 (Creation date: 2016-02-13, number of species: 40, number of BUSCOs: 4915)

Table S10. Summarized benchmarks in the genomes using the transcripts of the snowfinches.

| Data set                       | Number | Total length (bp) | Bases covered   | Sequences covered | with >90% sequence in one scaffold |         | with >50% sequence in one scaffold |         |
|--------------------------------|--------|-------------------|-----------------|-------------------|------------------------------------|---------|------------------------------------|---------|
|                                |        |                   | by assembly (%) | by assembly (%)   | Number                             | Percent | Number                             | Percent |
| <b>White-rumped Snowfinch</b>  |        |                   |                 |                   |                                    |         |                                    |         |
| >0bp                           | 48,154 | 43,653,617        | 95              | 93                | 40,548                             | 84.20   | 43,460                             | 90.25   |
| >200bp                         | 48,154 | 43,653,617        | 95              | 93                | 40,548                             | 84.20   | 43,460                             | 90.25   |
| >500bp                         | 22,275 | 35,452,001        | 97              | 97                | 19,797                             | 88.88   | 21,041                             | 94.46   |
| >1000bp                        | 12,048 | 28,291,319        | 97              | 99                | 11,025                             | 91.51   | 11,636                             | 96.58   |
| <b>Rufous-necked Snowfinch</b> |        |                   |                 |                   |                                    |         |                                    |         |
| >0bp                           | 65,576 | 65,351,754        | 96              | 97                | 56,910                             | 86.78   | 61,959                             | 94.48   |
| >200bp                         | 65,576 | 65,351,754        | 96              | 97                | 56,910                             | 86.78   | 61,959                             | 94.48   |
| >500bp                         | 30,965 | 54,966,782        | 97              | 99                | 27,259                             | 88.03   | 29,575                             | 95.51   |
| >1000bp                        | 19,508 | 46,938,185        | 97              | 100               | 17,575                             | 90.09   | 18,854                             | 96.65   |



Table S11. Completeness of three snowfinches genesets as assessed by BUSCO.

| BUSCO benchmark             | White-rumped Snowfinch |            | Black-winged Snowfinch |            | Rufous-necked Snowfinch |            |
|-----------------------------|------------------------|------------|------------------------|------------|-------------------------|------------|
|                             | Number                 | Percentage | Number                 | Percentage | Number                  | Percentage |
| Total BUSCO groups searched | 303                    |            | 303                    |            | 303                     |            |
| Complete single-copy BUSCOs | 285                    | 94.1%      | 272                    | 89.8%      | 274                     | 90.4%      |
| Complete duplicated BUSCOs  | 4                      | 1.3%       | 5                      | 1.7        | 6                       | 2.0%       |
| Fragmented BUSCOs           | 4                      | 1.3%       | 7                      | 2.3        | 7                       | 2.3%       |
| Missing BUSCOs              | 10                     | 3.3%       | 19                     | 6.2        | 16                      | 5.3%       |

Note: BUSCO version is: 2.0. The lineage dataset is: eukaryota\_odb9 (Creation date: 2016-02-13, number of species: 100, number of BUSCOs: 303)

Table S12. Positively selected genes identified in the *ancestor* and the individual species. Note that the blanks in column “Gene symbol” represent “not annotated”. The gene ID of positively selected gene in the *ancestor* used the gene ID of the *adamsi* as proxy.

| Gene ID         | Gene symbol     | Alternative_InL | Null_InL | P value  | FDR      |
|-----------------|-----------------|-----------------|----------|----------|----------|
| <i>Ancestor</i> |                 |                 |          |          |          |
| MAD011671       | <i>THRAP3</i>   | -6354.31        | -6544.41 | 1.12E-84 | 6.74E-81 |
| MAD011116       | <i>CHL1</i>     | -6929.97        | -7081.96 | 4.48E-68 | 1.34E-64 |
| MAD005608       | <i>SPTAN1</i>   | -12034.1        | -12163.4 | 3.55E-58 | 7.10E-55 |
| MAD001762       |                 | -5181.72        | -5294.83 | 3.99E-51 | 5.98E-48 |
| MAD011175       | <i>CNTN4</i>    | -5220.69        | -5307.52 | 1.17E-39 | 1.40E-36 |
| MAD006009       | <i>SLIT2</i>    | -5766.84        | -5852.15 | 5.40E-39 | 5.39E-36 |
| MAD006083       | <i>PI4K2B</i>   | -2134.98        | -2213.48 | 5.13E-36 | 4.40E-33 |
| MAD013938       | <i>PSMD13</i>   | -1990.28        | -2067.14 | 2.66E-35 | 2.00E-32 |
| MAD012525       | <i>SH3RF3</i>   | -3271.27        | -3346.55 | 1.32E-34 | 8.76E-32 |
| MAD010393       | <i>RB1</i>      | -4301.66        | -4370.13 | 1.25E-31 | 7.50E-29 |
| MAD011308       | <i>MCM8</i>     | -4392.24        | -4460.48 | 1.56E-31 | 8.49E-29 |
| MAD001408       | <i>GYLTL1B</i>  | -3989.15        | -4054.53 | 2.81E-30 | 1.41E-27 |
| MAD007136       | <i>PLEKHM2</i>  | -5497.6         | -5561.51 | 1.24E-29 | 5.70E-27 |
| MAD007997       | <i>NECAB1</i>   | -2687.25        | -2750.31 | 2.89E-29 | 1.24E-26 |
| MAD011110       |                 | -3812.13        | -3874.11 | 8.63E-29 | 3.45E-26 |
| MAD013320       | <i>OTOG</i>     | -8389.39        | -8449.9  | 3.78E-28 | 1.42E-25 |
| MAD011427       | <i>CAP1</i>     | -2543.71        | -2604.03 | 4.61E-28 | 1.63E-25 |
| MAD012910       | <i>NEDD1</i>    | -3458.69        | -3515.26 | 2.01E-26 | 6.68E-24 |
| MAD010703       | <i>SGCD</i>     | -1475.76        | -1530.08 | 1.95E-25 | 6.14E-23 |
| MAD002071       | <i>MCCC1</i>    | -3628.28        | -3681.96 | 3.69E-25 | 1.05E-22 |
| MAD009063       | <i>LANCL1</i>   | -2172.46        | -2226.16 | 3.62E-25 | 1.05E-22 |
| MAD014956       | <i>PCSK5</i>    | -2936.15        | -2987.64 | 3.39E-24 | 9.24E-22 |
| MAD005126       | <i>RASL12</i>   | -1893.54        | -1943.96 | 1.01E-23 | 2.62E-21 |
| MAD012804       | <i>LMBRD1</i>   | -2506.06        | -2553.47 | 2.08E-22 | 5.19E-20 |
| MAD010717       | <i>PDLIM7</i>   | -2185.17        | -2232.04 | 3.59E-22 | 8.61E-20 |
| MAD005571       | <i>WDR31</i>    | -1869.46        | -1912.71 | 1.39E-20 | 3.21E-18 |
| MAD006283       | <i>TOP3A</i>    | -5572.77        | -5615.98 | 1.46E-20 | 3.25E-18 |
| MAD005623       | <i>COL5A1</i>   | -4347.67        | -4389.8  | 4.33E-20 | 9.27E-18 |
| MAD007750       |                 | -1803.06        | -1843.86 | 1.67E-19 | 3.46E-17 |
| MAD001253       | <i>TAF2</i>     | -4193.85        | -4234.53 | 1.89E-19 | 3.78E-17 |
| MAD012687       | <i>COLGALT2</i> | -2860.36        | -2900.57 | 3.04E-19 | 5.88E-17 |
| MAD006010       | <i>TTC29</i>    | -2385.8         | -2425.84 | 3.61E-19 | 6.76E-17 |
| MAD014512       | <i>ENTPD6</i>   | -2208.58        | -2248.34 | 4.77E-19 | 8.66E-17 |
| MAD011467       | <i>TCEB3</i>    | -4096.91        | -4136.59 | 5.15E-19 | 9.08E-17 |
| MAD009384       | <i>ASAH2</i>    | -4172.41        | -4211.49 | 9.49E-19 | 1.62E-16 |
| MAD006744       | <i>ARHGEF18</i> | -5086.13        | -5124.03 | 3.13E-18 | 5.21E-16 |
| MAD006954       | <i>NEK8</i>     | -2435.96        | -2472.91 | 8.27E-18 | 1.34E-15 |
| MAD009726       | <i>MED1</i>     | -8373.27        | -8409.82 | 1.24E-17 | 1.95E-15 |
| MAD004500       | <i>RPRD1A</i>   | -1291.23        | -1327.52 | 1.61E-17 | 2.47E-15 |
| MAD002038       |                 | -1511.14        | -1546.81 | 3.01E-17 | 4.51E-15 |
| MAD010597       | <i>BRD8</i>     | -6821.8         | -6856.87 | 5.50E-17 | 8.03E-15 |

|           |                  |          |          |          |          |
|-----------|------------------|----------|----------|----------|----------|
| MAD014038 | <i>STRIP2</i>    | -4149.94 | -4184.84 | 6.58E-17 | 9.39E-15 |
| MAD008791 | <i>TBX2</i>      | -2884.49 | -2919.25 | 7.59E-17 | 1.06E-14 |
| MAD003600 |                  | -2380.99 | -2415.19 | 1.33E-16 | 1.81E-14 |
| MAD007917 | <i>TECPR2</i>    | -7600.53 | -7634.43 | 1.81E-16 | 2.41E-14 |
| MAD011029 | <i>OLFM4</i>     | -2947.17 | -2980.71 | 2.61E-16 | 3.40E-14 |
| MAD005184 | <i>IREB2</i>     | -4389.74 | -4422.9  | 3.86E-16 | 4.92E-14 |
| MAD002709 |                  | -8206.6  | -8239.12 | 7.31E-16 | 9.13E-14 |
| MAD003772 | <i>ANLN</i>      | -5907.05 | -5938.07 | 3.36E-15 | 4.11E-13 |
| MAD002238 | <i>B4GALNT3</i>  | -4945.33 | -4976.09 | 4.41E-15 | 5.28E-13 |
| MAD008195 | <i>TTC3</i>      | -6791.3  | -6821.48 | 7.85E-15 | 9.22E-13 |
| MAD003638 | <i>EXO1</i>      | -4764.59 | -4793.9  | 1.91E-14 | 2.20E-12 |
| MAD006762 |                  | -8586.78 | -8615.83 | 2.49E-14 | 2.81E-12 |
| MAD005642 | <i>PBX3</i>      | -2539.93 | -2567.71 | 9.03E-14 | 1.00E-11 |
| MAD006567 | <i>ATP2C1</i>    | -4152.05 | -4179.4  | 1.40E-13 | 1.52E-11 |
| MAD010555 | <i>CD74</i>      | -1436.49 | -1462.52 | 5.41E-13 | 5.79E-11 |
| MAD005649 | <i>UGDH</i>      | -2863.03 | -2888.81 | 6.90E-13 | 7.25E-11 |
| MAD001871 | <i>SLC16A12</i>  | -2991    | -3016.49 | 9.39E-13 | 9.70E-11 |
| MAD002427 | <i>CACNA2D4</i>  | -4043.12 | -4068.47 | 1.08E-12 | 1.10E-10 |
| MAD007190 | <i>PAK2</i>      | -2533.72 | -2558.82 | 1.39E-12 | 1.39E-10 |
| MAD002752 | <i>GALC</i>      | -3053.67 | -3078.06 | 2.84E-12 | 2.79E-10 |
| MAD012543 | <i>IL1R1</i>     | -3394.5  | -3418.68 | 3.52E-12 | 3.40E-10 |
| MAD001782 | <i>LRRC43</i>    | -2091.03 | -2115.2  | 3.58E-12 | 3.40E-10 |
| MAD013465 | <i>SCML2</i>     | -3800.12 | -3824.25 | 3.72E-12 | 3.48E-10 |
| MAD002983 | <i>RFX6</i>      | -4865.03 | -4888.9  | 4.88E-12 | 4.50E-10 |
| MAD000261 | <i>GPR50</i>     | -1551.4  | -1574.73 | 8.43E-12 | 7.66E-10 |
| MAD010744 |                  | -1381.53 | -1404.54 | 1.17E-11 | 1.05E-09 |
| MAD006852 |                  | -2387.26 | -2410    | 1.55E-11 | 1.36E-09 |
| MAD009346 | <i>MATR3</i>     | -4321.42 | -4344.06 | 1.70E-11 | 1.47E-09 |
| MAD005689 | <i>WWC2</i>      | -6155.29 | -6177.03 | 4.30E-11 | 3.68E-09 |
| MAD013375 | <i>BEND2</i>     | -2781.89 | -2803.19 | 6.72E-11 | 5.67E-09 |
| MAD008230 |                  | -3780.67 | -3801.92 | 7.06E-11 | 5.87E-09 |
| MAD010741 | <i>PANK3</i>     | -1698.73 | -1719.97 | 7.17E-11 | 5.89E-09 |
| MAD003096 | <i>MAML3</i>     | -2415.7  | -2436.56 | 1.05E-10 | 8.50E-09 |
| MAD007455 | <i>TTF2</i>      | -5644.89 | -5665.71 | 1.10E-10 | 8.79E-09 |
| MAD004239 | <i>DHRS7</i>     | -1617.23 | -1638.02 | 1.14E-10 | 8.96E-09 |
| MAD010258 | <i>CRYBA2</i>    | -1415.9  | -1435.85 | 2.66E-10 | 2.07E-08 |
| MAD000278 | <i>SMARCA1</i>   | -4476.47 | -4495.58 | 6.29E-10 | 4.83E-08 |
| MAD008505 | <i>PIGZ</i>      | -2826.45 | -2845.39 | 7.49E-10 | 5.68E-08 |
| MAD001903 |                  | -2801.07 | -2819.44 | 1.35E-09 | 1.01E-07 |
| MAD006049 | <i>HAND2</i>     | -621.967 | -639.956 | 2.00E-09 | 1.48E-07 |
| MAD005939 | <i>RNF220</i>    | -1138.79 | -1155.96 | 4.64E-09 | 3.39E-07 |
| MAD009294 | <i>CABP2</i>     | -695.26  | -711.578 | 1.11E-08 | 8.03E-07 |
| MAD013323 | <i>PTPRJ</i>     | -6816.5  | -6832.71 | 1.25E-08 | 8.89E-07 |
| MAD006174 | <i>TBL3</i>      | -4191.59 | -4207.76 | 1.29E-08 | 9.09E-07 |
| MAD000453 | <i>JAK1</i>      | -6368.14 | -6383.51 | 2.95E-08 | 2.05E-06 |
| MAD003599 | <i>C4H4orf29</i> | -2374.57 | -2388.83 | 9.22E-08 | 6.35E-06 |
| MAD011334 | <i>ZFAND3</i>    | -717.442 | -731.555 | 1.08E-07 | 7.36E-06 |
| MAD012511 | <i>SLC9A4</i>    | -3177.92 | -3191.78 | 1.41E-07 | 9.50E-06 |

|           |                 |          |          |          |          |
|-----------|-----------------|----------|----------|----------|----------|
| MAD007857 | <i>ARFGEF2</i>  | -9556.41 | -9570.03 | 1.80E-07 | 1.20E-05 |
| MAD000080 |                 | -3486.47 | -3499.97 | 2.05E-07 | 1.35E-05 |
| MAD009722 | <i>PLAA</i>     | -3491.34 | -3504.72 | 2.29E-07 | 1.49E-05 |
| MAD001288 | <i>KATNB1</i>   | -1473.03 | -1486.27 | 2.66E-07 | 1.71E-05 |
| MAD002531 | <i>PLXNB2</i>   | -9943.09 | -9956.22 | 2.99E-07 | 1.90E-05 |
| MAD006404 | <i>INTS8</i>    | -4741.38 | -4754.44 | 3.20E-07 | 2.02E-05 |
| MAD006935 | <i>GAS2L2</i>   | -1480.45 | -1493.5  | 3.27E-07 | 2.04E-05 |
| MAD013117 | <i>E2F4</i>     | -2095.86 | -2108.7  | 4.01E-07 | 2.48E-05 |
| MAD002786 | <i>ETV4</i>     | -2315.16 | -2327.65 | 5.76E-07 | 3.52E-05 |
| MAD000192 |                 | -3225.66 | -3237.98 | 6.88E-07 | 4.17E-05 |
| MAD010734 | <i>PPARGC1B</i> | -5940.93 | -5953.05 | 8.44E-07 | 5.06E-05 |
| MAD006426 | <i>TERF1</i>    | -2399.93 | -2411.74 | 1.18E-06 | 7.00E-05 |
| MAD006639 | <i>USP42</i>    | -1467.84 | -1479.25 | 1.77E-06 | 0.000104 |
| MAD005779 | <i>TEC</i>      | -3532.62 | -3543.56 | 2.89E-06 | 0.000168 |
| MAD011616 | <i>PABPC4</i>   | -3457.75 | -3468.44 | 3.79E-06 | 0.000218 |
| MAD010281 | <i>FAM117B</i>  | -1666.47 | -1676.98 | 4.51E-06 | 0.000257 |
| MAD014874 | <i>SYK</i>      | -3254.88 | -3265.35 | 4.74E-06 | 0.000268 |
| MAD008022 | <i>PLCG1</i>    | -6174.37 | -6184.78 | 5.06E-06 | 0.000283 |
| MAD000597 |                 | -6324.98 | -6335.21 | 6.12E-06 | 0.00034  |
| MAD012212 | <i>CYTH4</i>    | -2063.49 | -2073.67 | 6.42E-06 | 0.000353 |
| MAD005539 | <i>SLC31A2</i>  | -582.203 | -592.322 | 6.83E-06 | 0.000372 |
| MAD002686 | <i>CFAP61</i>   | -7652.76 | -7662.38 | 1.15E-05 | 0.00062  |
| MAD006791 | <i>SIN3B</i>    | -4454.75 | -4464.23 | 1.33E-05 | 0.000711 |
| MAD002724 | <i>STON2</i>    | -4501.44 | -4510.8  | 1.51E-05 | 0.000802 |
| MAD000628 | <i>FAAH2</i>    | -2207.1  | -2216.03 | 2.38E-05 | 0.00125  |
| MAD014244 |                 | -695.931 | -704.4   | 3.86E-05 | 0.002011 |
| MAD003276 | <i>PIGQ</i>     | -2984.27 | -2992.57 | 4.58E-05 | 0.002366 |
| MAD002411 | <i>CDKN1B</i>   | -1315.12 | -1323.39 | 4.78E-05 | 0.002449 |
| MAD013511 | <i>TNNT3</i>    | -799.18  | -807.158 | 6.48E-05 | 0.00329  |
| MAD005651 | <i>PDS5A</i>    | -6074.65 | -6082.52 | 7.29E-05 | 0.003671 |
| MAD004661 | <i>SH3BP4</i>   | -5008.19 | -5015.84 | 9.19E-05 | 0.004589 |
| MAD005199 | <i>TMC3</i>     | -5618.05 | -5625.67 | 9.49E-05 | 0.004698 |
| MAD000304 |                 | -2996.45 | -3003.91 | 0.000112 | 0.005501 |
| MAD007578 | <i>UBA6</i>     | -4824.55 | -4832    | 0.000113 | 0.005501 |
| MAD008205 | <i>SYTL5</i>    | -3879.56 | -3886.8  | 0.000141 | 0.00683  |
| MAD012830 | <i>RPL27</i>    | -571.223 | -578.431 | 0.000146 | 0.007023 |
| MAD000280 | <i>MAMLD1</i>   | -5471.64 | -5478.68 | 0.000175 | 0.00831  |
| MAD000356 |                 | -3523.57 | -3530.52 | 0.000193 | 0.009108 |
| MAD000315 | <i>ENOX2</i>    | -2715.9  | -2722.72 | 0.000222 | 0.01038  |
| MAD011295 | <i>DTL</i>      | -3836.9  | -3843.53 | 0.00027  | 0.012565 |
| MAD008498 | <i>SLC9A9</i>   | -3424.32 | -3430.92 | 0.000279 | 0.012845 |
| MAD011531 | <i>TSC1</i>     | -5742.75 | -5749.26 | 0.000306 | 0.014    |
| MAD001194 | <i>SNX16</i>    | -1704.24 | -1710.62 | 0.000356 | 0.016145 |
| MAD007155 | <i>PLCH2</i>    | -4286.41 | -4292.69 | 0.000396 | 0.017831 |
| MAD012520 | <i>DHRXS</i>    | -1601.99 | -1608.13 | 0.00046  | 0.020578 |
| MAD000963 | <i>TSEN54</i>   | -2282.73 | -2288.85 | 0.000466 | 0.02068  |
| MAD011258 | <i>KCTD3</i>    | -2922.63 | -2928.67 | 0.000506 | 0.022313 |
| MAD002334 |                 | -1606.57 | -1612.6  | 0.000512 | 0.022418 |

|               |                 |          |          |          |          |
|---------------|-----------------|----------|----------|----------|----------|
| MAD012277     | <i>METTL13</i>  | -3266.56 | -3272.4  | 0.00063  | 0.027359 |
| MAD010728     | <i>CYFIP2</i>   | -4085.46 | -4091.17 | 0.000727 | 0.031326 |
| MAD000004     | <i>ZRANB3</i>   | -5549.23 | -5554.89 | 0.000772 | 0.033066 |
| MAD007683     | <i>CEP290</i>   | -12770.8 | -12776.4 | 0.000797 | 0.033888 |
| MAD000109     | <i>WNT6</i>     | -1810.74 | -1816.28 | 0.000875 | 0.036938 |
| MAD012022     |                 | -872.635 | -878.152 | 0.000894 | 0.037481 |
| MAD011428     | <i>EPB41</i>    | -4220.74 | -4226.17 | 0.000987 | 0.041076 |
| <i>Adamsi</i> |                 |          |          |          |          |
| MAD005807     | <i>TGFBR3</i>   | -4567.56 | -4729.05 | 3.26E-72 | 1.95E-68 |
| MAD004040     | <i>PACS2</i>    | -4223.65 | -4357.09 | 5.44E-60 | 1.63E-56 |
| MAD012169     | <i>FBXO7</i>    | -2885.04 | -3017.15 | 2.08E-59 | 4.15E-56 |
| MAD008523     | <i>SLC16A14</i> | -2957.85 | -3085.97 | 1.13E-57 | 1.69E-54 |
| MAD007228     | <i>TSPEAR</i>   | -3372.3  | -3498.96 | 4.94E-57 | 5.92E-54 |
| MAD013389     | <i>CDH9</i>     | -4358.93 | -4484.02 | 2.36E-56 | 2.36E-53 |
| MAD014976     | <i>SETD4</i>    | -2845.52 | -2966.88 | 1.01E-54 | 8.64E-52 |
| MAD012555     | <i>EIF5B</i>    | -5788.59 | -5907.36 | 1.35E-53 | 1.01E-50 |
| MAD003260     | <i>XPO6</i>     | -5017.61 | -5136.14 | 1.72E-53 | 1.15E-50 |
| MAD002358     | <i>INPP4A</i>   | -4703.42 | -4820.02 | 1.19E-52 | 7.16E-50 |
| MAD002874     | <i>SLC22A2</i>  | -3319.06 | -3433.63 | 9.10E-52 | 4.54E-49 |
| MAD011132     | <i>PLXNA1</i>   | -7232.16 | -7346.76 | 8.88E-52 | 4.54E-49 |
| MAD014145     | <i>SCNN1D</i>   | -2957.84 | -3072.33 | 1.00E-51 | 4.61E-49 |
| MAD012019     | <i>IGSF9B</i>   | -3301.9  | -3415.9  | 1.62E-51 | 6.93E-49 |
| MAD008947     | <i>UBE4B</i>    | -5893.94 | -6004.14 | 7.40E-50 | 2.96E-47 |
| MAD012960     | <i>SMAP1</i>    | -2127.6  | -2236.86 | 1.91E-49 | 7.16E-47 |
| MAD014112     | <i>TP63</i>     | -3435.11 | -3538.99 | 4.23E-47 | 1.49E-44 |
| MAD009593     | <i>FOCAD</i>    | -6192.67 | -6296.1  | 6.69E-47 | 2.23E-44 |
| MAD013247     | <i>OGDH</i>     | -5264.14 | -5367.16 | 1.01E-46 | 3.19E-44 |
| MAD014450     | <i>COBL</i>     | -4773.7  | -4876.65 | 1.08E-46 | 3.25E-44 |
| MAD006811     | <i>LRRC16A</i>  | -5574.53 | -5677.24 | 1.37E-46 | 3.90E-44 |
| MAD002651     | <i>ANAPCI</i>   | -9987.22 | -10084.3 | 4.07E-44 | 1.11E-41 |
| MAD005876     | <i>ROR1</i>     | -3748.94 | -3845.11 | 9.81E-44 | 2.56E-41 |
| MAD013009     | <i>ATMIN</i>    | -3725.26 | -3820.15 | 3.53E-43 | 8.83E-41 |
| MAD000118     | <i>HECW2</i>    | -9030.22 | -9123.9  | 1.20E-42 | 2.85E-40 |
| MAD013663     | <i>ERCC5</i>    | -4225.8  | -4319.45 | 1.24E-42 | 2.85E-40 |
| MAD010576     | <i>FBXO38</i>   | -5934.79 | -6027.23 | 4.19E-42 | 9.31E-40 |
| MAD011712     | <i>IFT81</i>    | -3765.99 | -3858.32 | 4.63E-42 | 9.92E-40 |
| MAD009372     |                 | -4929.73 | -5021.4  | 9.09E-42 | 1.88E-39 |
| MAD006072     | <i>LIMCH1</i>   | -5680.22 | -5771.16 | 1.88E-41 | 3.76E-39 |
| MAD013529     |                 | -3329.31 | -3420.1  | 2.20E-41 | 4.25E-39 |
| MAD014399     | <i>SLC35F4</i>  | -2483.33 | -2574.02 | 2.42E-41 | 4.54E-39 |
| MAD005458     | <i>AKAP13</i>   | -6929.85 | -7018.08 | 2.88E-40 | 5.23E-38 |
| MAD011892     | <i>FGFR3</i>    | -3887.43 | -3974.42 | 9.98E-40 | 1.76E-37 |
| MAD002674     | <i>PLCB4</i>    | -6289.01 | -6375.93 | 1.07E-39 | 1.83E-37 |
| MAD006351     |                 | -7774.95 | -7860.86 | 2.97E-39 | 4.94E-37 |
| MAD004204     | <i>DAAMI</i>    | -5170.96 | -5256.29 | 5.28E-39 | 8.55E-37 |
| MAD008256     | <i>SYNE3</i>    | -4778.07 | -4862.38 | 1.49E-38 | 2.35E-36 |
| MAD004749     |                 | -13179.2 | -13263.4 | 1.59E-38 | 2.44E-36 |
| MAD004375     | <i>GPI</i>      | -2915.21 | -2998.46 | 4.28E-38 | 6.41E-36 |

|           |                 |          |          |          |          |
|-----------|-----------------|----------|----------|----------|----------|
| MAD011116 | <i>CHL1</i>     | -6999.61 | -7082.24 | 8.05E-38 | 1.18E-35 |
| MAD006888 | <i>CHD5</i>     | -7883.64 | -7965.17 | 2.43E-37 | 3.47E-35 |
| MAD007338 | <i>ITPR3</i>    | -12674.2 | -12754.1 | 1.20E-36 | 1.67E-34 |
| MAD002575 | <i>TBC1D22B</i> | -2494.02 | -2573.3  | 2.32E-36 | 3.17E-34 |
| MAD008938 | <i>KIF1B</i>    | -9721.58 | -9799.17 | 1.28E-35 | 1.71E-33 |
| MAD008367 | <i>NRP1</i>     | -5119.97 | -5197.37 | 1.55E-35 | 2.02E-33 |
| MAD003362 | <i>ASH1L</i>    | -17196.4 | -17273.3 | 2.46E-35 | 3.14E-33 |
| MAD000043 | <i>MARCO</i>    | -3476.92 | -3553.52 | 3.45E-35 | 4.30E-33 |
| MAD011350 | <i>RPS6KC1</i>  | -5468.68 | -5545.17 | 3.87E-35 | 4.73E-33 |
| MAD001483 | <i>F2</i>       | -3507.79 | -3582.96 | 1.46E-34 | 1.75E-32 |
| MAD013095 | <i>CPNE2</i>    | -2839.22 | -2914.06 | 2.04E-34 | 2.40E-32 |
| MAD006877 | <i>MFN2</i>     | -4299.99 | -4374.43 | 3.06E-34 | 3.53E-32 |
| MAD002264 | <i>PARPBP</i>   | -3255.95 | -3329.14 | 1.08E-33 | 1.22E-31 |
| MAD012127 | <i>MME</i>      | -4206.15 | -4278.38 | 2.81E-33 | 3.12E-31 |
| MAD010615 | <i>LECT2</i>    | -1882.73 | -1953.91 | 8.12E-33 | 8.85E-31 |
| MAD011402 | <i>SCMH1</i>    | -2546.17 | -2615.25 | 6.71E-32 | 7.18E-30 |
| MAD002301 |                 | -2117.24 | -2186.26 | 7.15E-32 | 7.52E-30 |
| MAD009894 | <i>YTHDC2</i>   | -7073.92 | -7142.39 | 1.24E-31 | 1.29E-29 |
| MAD010246 | <i>TMBIM1</i>   | -2194.15 | -2262.32 | 1.68E-31 | 1.71E-29 |
| MAD001694 | <i>DLGAP1</i>   | -4912.08 | -4980.02 | 2.11E-31 | 2.11E-29 |
| MAD010249 | <i>OLA1</i>     | -1934.73 | -2002.3  | 3.05E-31 | 3.00E-29 |
| MAD006456 | <i>ADHFE1</i>   | -2206.93 | -2272.55 | 2.18E-30 | 2.11E-28 |
| MAD006463 | <i>WWP1</i>     | -3990.39 | -4054.21 | 1.34E-29 | 1.28E-27 |
| MAD006180 | <i>IL21R</i>    | -3447.81 | -3511.13 | 2.23E-29 | 2.09E-27 |
| MAD012386 | <i>SLC6A17</i>  | -3705.34 | -3767.9  | 4.80E-29 | 4.42E-27 |
| MAD000310 | <i>OCRL</i>     | -3811.99 | -3874.21 | 6.71E-29 | 6.09E-27 |
| MAD005642 | <i>PBX3</i>     | -2504.52 | -2566.55 | 8.18E-29 | 7.32E-27 |
| MAD005431 | <i>PARP6</i>    | -3486.98 | -3548.52 | 1.34E-28 | 1.18E-26 |
| MAD010924 | <i>EEFSEC</i>   | -2474.23 | -2535.71 | 1.42E-28 | 1.23E-26 |
| MAD012203 | <i>RFX4</i>     | -2527.12 | -2587.29 | 5.31E-28 | 4.55E-26 |
| MAD009467 | <i>HIPK3</i>    | -6477.03 | -6536.98 | 6.61E-28 | 5.58E-26 |
| MAD008831 | <i>MAP4K5</i>   | -2754.1  | -2813.79 | 8.59E-28 | 7.15E-26 |
| MAD007814 | <i>SLC12A4</i>  | -4766.53 | -4825.95 | 1.14E-27 | 9.33E-26 |
| MAD009625 | <i>TEAD4</i>    | -1362.05 | -1421.38 | 1.25E-27 | 1.01E-25 |
| MAD001980 | <i>RRP12</i>    | -6253.22 | -6312.49 | 1.32E-27 | 1.06E-25 |
| MAD013295 | <i>RIOK1</i>    | -3093.47 | -3151.57 | 4.33E-27 | 3.37E-25 |
| MAD003718 | <i>DNAJC5</i>   | -1075.27 | -1133.36 | 4.30E-27 | 3.37E-25 |
| MAD009726 | <i>MED1</i>     | -8349.63 | -8407.64 | 4.70E-27 | 3.61E-25 |
| MAD003285 | <i>SEC14L5</i>  | -3514.6  | -3572.58 | 4.85E-27 | 3.68E-25 |
| MAD002686 | <i>CFAP61</i>   | -7604.86 | -7662.62 | 6.07E-27 | 4.54E-25 |
| MAD013523 | <i>ALDH1L2</i>  | -4466.77 | -4524.25 | 7.99E-27 | 5.91E-25 |
| MAD014609 | <i>PLCXD3</i>   | -1518.99 | -1576.3  | 9.56E-27 | 6.98E-25 |
| MAD010282 | <i>PLEKHM3</i>  | -4188.65 | -4245.93 | 9.82E-27 | 7.09E-25 |
| MAD007154 |                 | -2554.64 | -2610.78 | 3.10E-26 | 2.21E-24 |
| MAD006353 | <i>SNX29</i>    | -1696.12 | -1751.84 | 4.72E-26 | 3.33E-24 |
| MAD013467 | <i>CTPS2</i>    | -2806.54 | -2862.06 | 5.79E-26 | 4.04E-24 |
| MAD007304 | <i>SLC22A15</i> | -2946.55 | -3001.59 | 9.39E-26 | 6.47E-24 |
| MAD004577 | <i>ARHGEF39</i> | -1807.61 | -1861.01 | 4.88E-25 | 3.33E-23 |

|           |                 |          |          |          |          |
|-----------|-----------------|----------|----------|----------|----------|
| MAD010608 | <i>HMMR</i>     | -3597.41 | -3650.39 | 7.53E-25 | 5.07E-23 |
| MAD011367 | <i>MTFRIL</i>   | -2040.12 | -2092.64 | 1.19E-24 | 7.95E-23 |
| MAD008485 | <i>TRAPPC12</i> | -4114.04 | -4166.29 | 1.57E-24 | 1.04E-22 |
| MAD006730 | <i>RAB31</i>    | -1028.37 | -1079.68 | 4.06E-24 | 2.64E-22 |
| MAD014461 | <i>ASCC3</i>    | -10079.7 | -10130.6 | 6.11E-24 | 3.94E-22 |
| MAD003149 |                 | -3644.37 | -3695.26 | 6.18E-24 | 3.94E-22 |
| MAD007858 | <i>COL20A1</i>  | -8009.21 | -8059.71 | 9.25E-24 | 5.83E-22 |
| MAD005709 | <i>PPAT</i>     | -2508.96 | -2559.43 | 9.53E-24 | 5.95E-22 |
| MAD007229 | <i>ATG4B</i>    | -1841.64 | -1891.37 | 1.99E-23 | 1.23E-21 |
| MAD011767 | <i>ADGRD1</i>   | -4187.65 | -4237.06 | 2.77E-23 | 1.69E-21 |
| MAD009912 | <i>CHD1</i>     | -6514.02 | -6563.26 | 3.29E-23 | 1.99E-21 |
| MAD006494 | <i>ZNF804B</i>  | -3884.36 | -3933.23 | 4.79E-23 | 2.87E-21 |
| MAD006350 | <i>SMG1</i>     | -14041.1 | -14089.9 | 5.39E-23 | 3.20E-21 |
| MAD013254 | <i>GMCL1</i>    | -2087.73 | -2136.37 | 6.06E-23 | 3.56E-21 |
| MAD003374 | <i>HDGF</i>     | -1062.47 | -1110.28 | 1.39E-22 | 8.07E-21 |
| MAD003252 | <i>IFT122</i>   | -5487.19 | -5534.78 | 1.74E-22 | 1.00E-20 |
| MAD013418 |                 | -1789.11 | -1836.67 | 1.78E-22 | 1.02E-20 |
| MAD009695 | <i>TRIP13</i>   | -2177.51 | -2224.79 | 2.36E-22 | 1.33E-20 |
| MAD007650 | <i>LIN7A</i>    | -1157.91 | -1204.72 | 3.84E-22 | 2.15E-20 |
| MAD001896 | <i>KNDC1</i>    | -3012.67 | -3059.33 | 4.42E-22 | 2.45E-20 |
| MAD012554 | <i>UNC50</i>    | -1416.61 | -1463.1  | 5.27E-22 | 2.90E-20 |
| MAD005395 | <i>CLN6</i>     | -1224.88 | -1271.11 | 6.83E-22 | 3.72E-20 |
| MAD012956 | <i>TTK</i>      | -2984.82 | -3030.97 | 7.44E-22 | 4.02E-20 |
| MAD005770 | <i>ASAHI</i>    | -1523.86 | -1569.85 | 8.74E-22 | 4.68E-20 |
| MAD007651 | <i>PPFIA2</i>   | -4274.32 | -4320.15 | 1.03E-21 | 5.48E-20 |
| MAD002856 | <i>ARID1B</i>   | -7419.62 | -7464.97 | 1.66E-21 | 8.74E-20 |
| MAD012289 | <i>SOAT1</i>    | -2663.14 | -2708.4  | 1.82E-21 | 9.49E-20 |
| MAD005420 | <i>SCAPER</i>   | -6419.03 | -6464.28 | 1.84E-21 | 9.52E-20 |
| MAD013406 | <i>USP54</i>    | -5674.07 | -5718.79 | 3.16E-21 | 1.62E-19 |
| MAD007578 | <i>UBA6</i>     | -4785.07 | -4829.37 | 4.83E-21 | 2.45E-19 |
| MAD011863 | <i>SFXN5</i>    | -1250.2  | -1294.42 | 5.27E-21 | 2.66E-19 |
| MAD013332 | <i>GTF2H1</i>   | -2861.76 | -2905.3  | 1.04E-20 | 5.19E-19 |
| MAD007077 | <i>UBN2</i>     | -5845.66 | -5889.09 | 1.16E-20 | 5.73E-19 |
| MAD008233 | <i>BCL11B</i>   | -3386.49 | -3429.81 | 1.30E-20 | 6.41E-19 |
| MAD006663 | <i>STT3A</i>    | -3425.96 | -3469.13 | 1.52E-20 | 7.43E-19 |
| MAD002953 | <i>ATP9A</i>    | -4533.92 | -4577.04 | 1.59E-20 | 7.68E-19 |
| MAD002457 | <i>SPPL3</i>    | -1931.04 | -1974.05 | 1.77E-20 | 8.50E-19 |
| MAD002335 | <i>CNGA3</i>    | -3889.76 | -3932.27 | 2.96E-20 | 1.41E-18 |
| MAD009385 | <i>TMEM26</i>   | -2068.13 | -2109.66 | 7.93E-20 | 3.74E-18 |
| MAD000485 | <i>NDC1</i>     | -2626.02 | -2667.17 | 1.17E-19 | 5.48E-18 |
| MAD013007 |                 | -868.839 | -909.78  | 1.45E-19 | 6.71E-18 |
| MAD001775 | <i>KNTC1</i>    | -12485   | -12525.7 | 1.74E-19 | 8.02E-18 |
| MAD012053 | <i>GRIK4</i>    | -2038.09 | -2078.76 | 1.89E-19 | 8.67E-18 |
| MAD000782 | <i>HGS</i>      | -3663.29 | -3703.9  | 2.01E-19 | 9.14E-18 |
| MAD006472 | <i>NDUFAF6</i>  | -1001.25 | -1041.7  | 2.38E-19 | 1.07E-17 |
| MAD008648 |                 | -1534.8  | -1575.09 | 2.78E-19 | 1.24E-17 |
| MAD006071 | <i>SLC30A9</i>  | -2100.98 | -2140.97 | 3.78E-19 | 1.68E-17 |
| MAD010774 | <i>CANX</i>     | -3025.03 | -3064.75 | 5.00E-19 | 2.20E-17 |

|           |                    |          |          |          |          |
|-----------|--------------------|----------|----------|----------|----------|
| MAD001227 | <i>MYBL1</i>       | -2401.19 | -2440.27 | 9.53E-19 | 4.17E-17 |
| MAD011694 |                    | -737.942 | -776.837 | 1.15E-18 | 4.98E-17 |
| MAD006782 | <i>RNF126</i>      | -1447.86 | -1486.66 | 1.26E-18 | 5.42E-17 |
| MAD000837 | <i>HEXDC</i>       | -2943.92 | -2982.7  | 1.30E-18 | 5.56E-17 |
| MAD008013 | <i>TRPC4AP</i>     | -3660.51 | -3699.09 | 1.57E-18 | 6.67E-17 |
| MAD004064 | <i>KLHDC1</i>      | -1970.76 | -2009    | 2.22E-18 | 9.36E-17 |
| MAD011580 | <i>AK8</i>         | -1763.62 | -1801.36 | 3.70E-18 | 1.55E-16 |
| MAD011148 | <i>SEMA3F</i>      | -2653.47 | -2691.16 | 3.86E-18 | 1.61E-16 |
| MAD009722 | <i>PLAA</i>        | -3453.82 | -3491.5  | 3.94E-18 | 1.63E-16 |
| MAD008786 | <i>AKAP1</i>       | -2554.56 | -2591.41 | 9.14E-18 | 3.75E-16 |
| MAD001067 | <i>TOPAZ1</i>      | -2948.99 | -2984.27 | 4.50E-17 | 1.83E-15 |
| MAD002057 | <i>RARRES1</i>     | -1070.83 | -1105.85 | 5.81E-17 | 2.35E-15 |
| MAD004132 | <i>FBXO18</i>      | -2753.77 | -2788.69 | 6.40E-17 | 2.57E-15 |
| MAD011980 | <i>SORCS2</i>      | -4038.87 | -4073.35 | 1.00E-16 | 4.01E-15 |
| MAD012953 | <i>ORC3</i>        | -1885.01 | -1918.87 | 1.88E-16 | 7.46E-15 |
| MAD003408 | <i>DIS3</i>        | -4533.18 | -4566.67 | 2.74E-16 | 1.08E-14 |
| MAD004475 |                    | -1383.89 | -1417.37 | 2.77E-16 | 1.08E-14 |
| MAD007819 | <i>C11H16orf70</i> | -1601.24 | -1634.53 | 3.36E-16 | 1.31E-14 |
| MAD013458 | <i>ACOT9</i>       | -1652.01 | -1685.14 | 3.96E-16 | 1.52E-14 |
| MAD009542 | <i>ADSSL1</i>      | -1948.87 | -1982    | 3.95E-16 | 1.52E-14 |
| MAD010283 | <i>MDH1B</i>       | -2466.32 | -2499.27 | 4.77E-16 | 1.82E-14 |
| MAD005649 | <i>UGDH</i>        | -2855.53 | -2888.46 | 4.87E-16 | 1.85E-14 |
| MAD014457 | <i>MMS22L</i>      | -6986.73 | -7019.37 | 6.51E-16 | 2.45E-14 |
| MAD007143 | <i>PHC2</i>        | -1186.63 | -1219.21 | 6.93E-16 | 2.59E-14 |
| MAD003151 | <i>PAK1IP1</i>     | -1967.88 | -2000.19 | 9.06E-16 | 3.37E-14 |
| MAD013283 | <i>NUP153</i>      | -7491.25 | -7523.19 | 1.33E-15 | 4.91E-14 |
| MAD009065 | <i>NUP35</i>       | -1107.6  | -1139.5  | 1.38E-15 | 5.07E-14 |
| MAD012477 | <i>PNPT1</i>       | -4388.5  | -4420.02 | 2.02E-15 | 7.40E-14 |
| MAD014292 |                    | -1586.44 | -1617.36 | 3.72E-15 | 1.35E-13 |
| MAD011313 | <i>ETAA1</i>       | -4589.53 | -4620.4  | 3.91E-15 | 1.41E-13 |
| MAD010324 | <i>PDIA5</i>       | -1628.74 | -1659.61 | 3.94E-15 | 1.41E-13 |
| MAD013943 | <i>MED19</i>       | -1053.65 | -1084.44 | 4.22E-15 | 1.50E-13 |
| MAD014008 | <i>CCAR1</i>       | -6489.72 | -6520.51 | 4.23E-15 | 1.50E-13 |
| MAD001205 | <i>NOLA</i>        | -2453.78 | -2484.49 | 4.58E-15 | 1.62E-13 |
| MAD000859 | <i>UTP6</i>        | -3547.46 | -3578.02 | 5.36E-15 | 1.88E-13 |
| MAD003739 | <i>LPCAT1</i>      | -2615.14 | -2645.45 | 6.92E-15 | 2.41E-13 |
| MAD012296 | <i>DHX9</i>        | -2675.82 | -2706.1  | 7.12E-15 | 2.47E-13 |
| MAD003017 | <i>LACE1</i>       | -2340.16 | -2370.02 | 1.10E-14 | 3.79E-13 |
| MAD012368 | <i>RNF10</i>       | -3959.18 | -3988.86 | 1.32E-14 | 4.53E-13 |
| MAD009151 | <i>DZANK1</i>      | -3797.22 | -3826.7  | 1.60E-14 | 5.46E-13 |
| MAD008766 | <i>DDX49</i>       | -1476.63 | -1505.96 | 1.87E-14 | 6.34E-13 |
| MAD001628 | <i>GREB1L</i>      | -3557.9  | -3587.12 | 2.09E-14 | 7.05E-13 |
| MAD007641 | <i>AMOTL2</i>      | -4085.46 | -4114.19 | 3.44E-14 | 1.15E-12 |
| MAD000345 | <i>MTMR1</i>       | -2485.02 | -2513.73 | 3.51E-14 | 1.17E-12 |
| MAD004666 | <i>USP40</i>       | -6693.73 | -6722.38 | 3.76E-14 | 1.24E-12 |
| MAD001654 | <i>HSD11B1L</i>    | -2244.28 | -2272.9  | 3.87E-14 | 1.27E-12 |
| MAD013325 | <i>SBF2</i>        | -7659.98 | -7688.44 | 4.57E-14 | 1.50E-12 |
| MAD006357 | <i>ZC3H7A</i>      | -3793.88 | -3822.02 | 6.28E-14 | 2.05E-12 |



|           |                   |          |          |          |          |
|-----------|-------------------|----------|----------|----------|----------|
| MAD010276 | <i>CFLAR</i>      | -2707.55 | -2735.66 | 6.51E-14 | 2.11E-12 |
| MAD005154 | <i>MYO9A</i>      | -13582.7 | -13610.4 | 9.64E-14 | 3.11E-12 |
| MAD001975 | <i>DNTT</i>       | -2696.15 | -2723.47 | 1.46E-13 | 4.66E-12 |
| MAD013574 | <i>C1H21orf59</i> | -1440.31 | -1467.55 | 1.57E-13 | 5.01E-12 |
| MAD000177 | <i>SNX4</i>       | -1886.7  | -1913.82 | 1.78E-13 | 5.63E-12 |
| MAD009698 | <i>TNS3</i>       | -4973.25 | -5000.19 | 2.14E-13 | 6.74E-12 |
| MAD009729 | <i>FBXO47</i>     | -2371.43 | -2398.13 | 2.72E-13 | 8.53E-12 |
| MAD007481 | <i>ALDH18A1</i>   | -4310.4  | -4336.99 | 3.06E-13 | 9.55E-12 |
| MAD010808 | <i>TSEN2</i>      | -3007.16 | -3033.44 | 4.19E-13 | 1.30E-11 |
| MAD012998 | <i>WFDC1</i>      | -1360.89 | -1387.08 | 4.57E-13 | 1.41E-11 |
| MAD009149 | <i>RRBP1</i>      | -5127.77 | -5153.91 | 4.84E-13 | 1.49E-11 |
| MAD007718 | <i>PDPR</i>       | -4238.15 | -4263.8  | 7.95E-13 | 2.43E-11 |
| MAD002531 | <i>PLXNB2</i>     | -9930.7  | -9956.22 | 9.03E-13 | 2.75E-11 |
| MAD007429 |                   | -2449.16 | -2474.55 | 1.03E-12 | 3.13E-11 |
| MAD000638 | <i>C4AH8orf48</i> | -631.871 | -657.144 | 1.16E-12 | 3.50E-11 |
| MAD007309 | <i>BOC</i>        | -2306.63 | -2331.65 | 1.50E-12 | 4.50E-11 |
| MAD000175 | <i>CCDC14</i>     | -1779.47 | -1804.45 | 1.56E-12 | 4.66E-11 |
| MAD003545 |                   | -4025.65 | -4050.59 | 1.63E-12 | 4.85E-11 |
| MAD007060 | <i>TEX33</i>      | -476.951 | -501.54  | 2.34E-12 | 6.90E-11 |
| MAD014486 | <i>SLC45A2</i>    | -1752.11 | -1776.69 | 2.35E-12 | 6.91E-11 |
| MAD006602 | <i>PRTFDC1</i>    | -844.653 | -869.186 | 2.48E-12 | 7.24E-11 |
| MAD009703 | <i>MAMDC2</i>     | -3207.53 | -3231.76 | 3.38E-12 | 9.84E-11 |
| MAD006831 | <i>TTC34</i>      | -3177.9  | -3201.93 | 4.11E-12 | 1.19E-10 |
| MAD004799 |                   | -2133.55 | -2157.53 | 4.38E-12 | 1.26E-10 |
| MAD003455 | <i>TM9SF4</i>     | -3026.59 | -3050.3  | 5.74E-12 | 1.65E-10 |
| MAD003743 | <i>ZNF830</i>     | -1760.12 | -1783.74 | 6.27E-12 | 1.79E-10 |
| MAD003368 | <i>GON4L</i>      | -8121.16 | -8144.53 | 8.10E-12 | 2.30E-10 |
| MAD002046 | <i>KPNA4</i>      | -2754.36 | -2777.53 | 9.98E-12 | 2.82E-10 |
| MAD012676 | <i>MGST3</i>      | -1087.21 | -1110.23 | 1.16E-11 | 3.26E-10 |
| MAD013660 | <i>CLYBL</i>      | -1144.26 | -1167.02 | 1.52E-11 | 4.24E-10 |
| MAD001716 | <i>TMX3</i>       | -1681.33 | -1704.07 | 1.53E-11 | 4.27E-10 |
| MAD001238 | <i>FABP4</i>      | -1003.88 | -1026.5  | 1.74E-11 | 4.83E-10 |
| MAD004175 | <i>DLL1</i>       | -2649.99 | -2672.38 | 2.20E-11 | 6.06E-10 |
| MAD005598 |                   | -834.695 | -856.642 | 3.47E-11 | 9.53E-10 |
| MAD010292 | <i>ATF2</i>       | -2274.92 | -2296.71 | 4.06E-11 | 1.11E-09 |
| MAD013724 | <i>PKHD1</i>      | -8804.88 | -8826.32 | 5.83E-11 | 1.59E-09 |
| MAD000471 | <i>PIK3R3</i>     | -3125.49 | -3146.86 | 6.25E-11 | 1.69E-09 |
| MAD013669 | <i>IFNG</i>       | -1329.5  | -1350.8  | 6.67E-11 | 1.80E-09 |
| MAD014483 | <i>PRLR</i>       | -4626.84 | -4647.95 | 8.19E-11 | 2.20E-09 |
| MAD008137 |                   | -4936.83 | -4957.72 | 1.02E-10 | 2.73E-09 |
| MAD011161 | <i>PPP4R2</i>     | -1909.15 | -1929.54 | 1.71E-10 | 4.55E-09 |
| MAD012370 | <i>SRRM4</i>      | -1655.19 | -1675.45 | 1.95E-10 | 5.16E-09 |
| MAD005653 | <i>YIPF7</i>      | -1725.39 | -1745.52 | 2.22E-10 | 5.87E-09 |
| MAD003145 | <i>GMPR</i>       | -1694.26 | -1714.32 | 2.38E-10 | 6.25E-09 |
| MAD004290 | <i>LGALS3</i>     | -1008.05 | -1027.87 | 3.06E-10 | 8.00E-09 |
| MAD012605 | <i>SLC16A4</i>    | -3041.69 | -3061.48 | 3.13E-10 | 8.16E-09 |
| MAD006073 | <i>UCHL1</i>      | -1211.65 | -1231.25 | 3.81E-10 | 9.90E-09 |
| MAD001485 | <i>C5H11orf49</i> | -1289.43 | -1309.02 | 3.87E-10 | 1.00E-08 |

|           |                  |          |          |          |          |
|-----------|------------------|----------|----------|----------|----------|
| MAD005305 | <i>PGPEP1L</i>   | -1111.25 | -1130.82 | 3.96E-10 | 1.02E-08 |
| MAD000626 | <i>HDAC8</i>     | -1779.6  | -1798.75 | 6.08E-10 | 1.56E-08 |
| MAD007693 | <i>CAPS2</i>     | -978.324 | -997.4   | 6.55E-10 | 1.66E-08 |
| MAD003529 | <i>KIDINS220</i> | -8069.12 | -8088.2  | 6.53E-10 | 1.66E-08 |
| MAD007756 | <i>FTO</i>       | -2102.04 | -2120.85 | 8.56E-10 | 2.16E-08 |
| MAD012680 | <i>ACBD6</i>     | -1187.36 | -1206.08 | 9.42E-10 | 2.37E-08 |
| MAD014580 |                  | -1103.12 | -1121.29 | 1.67E-09 | 4.18E-08 |
| MAD006722 | <i>NAPG</i>      | -1381.05 | -1399.17 | 1.75E-09 | 4.37E-08 |
| MAD010343 | <i>MTMR2</i>     | -3204.3  | -3222.24 | 2.10E-09 | 5.22E-08 |
| MAD013795 | <i>TERF2</i>     | -2511.28 | -2528.91 | 2.88E-09 | 7.13E-08 |
| MAD008950 | <i>PEX14</i>     | -2290.41 | -2307.92 | 3.24E-09 | 7.98E-08 |
| MAD008230 |                  | -3783.13 | -3800.61 | 3.37E-09 | 8.28E-08 |
| MAD004081 | <i>ADARB1</i>    | -3563.07 | -3580.31 | 4.32E-09 | 1.06E-07 |
| MAD006747 | <i>PSMG2</i>     | -1673.67 | -1690.83 | 4.68E-09 | 1.14E-07 |
| MAD003938 | <i>POLR3F</i>    | -1633.1  | -1650.06 | 5.77E-09 | 1.40E-07 |
| MAD008775 | <i>HNRNPM</i>    | -2344.77 | -2361.48 | 7.45E-09 | 1.80E-07 |
| MAD006013 | <i>BANK1</i>     | -1075.19 | -1091.77 | 8.41E-09 | 2.02E-07 |
| MAD006589 | <i>PHF14</i>     | -2929.83 | -2946.31 | 9.43E-09 | 2.26E-07 |
| MAD011110 |                  | -3860.26 | -3876.7  | 9.83E-09 | 2.35E-07 |
| MAD011978 | <i>NELFA</i>     | -1932.6  | -1949.01 | 1.01E-08 | 2.41E-07 |
| MAD009969 | <i>RBM8A</i>     | -792.911 | -809.282 | 1.05E-08 | 2.49E-07 |
| MAD004336 | <i>SAMM50</i>    | -1187.3  | -1203.62 | 1.11E-08 | 2.63E-07 |
| MAD010295 |                  | -4736.84 | -4753.11 | 1.16E-08 | 2.74E-07 |
| MAD001493 | <i>LRRC56</i>    | -607.681 | -623.386 | 2.09E-08 | 4.89E-07 |
| MAD008338 | <i>SEC63</i>     | -2460    | -2475.47 | 2.64E-08 | 6.16E-07 |
| MAD010254 | <i>RIF1</i>      | -6600.66 | -6616.12 | 2.68E-08 | 6.23E-07 |
| MAD012506 | <i>GAS6</i>      | -3458.83 | -3474.22 | 2.89E-08 | 6.69E-07 |
| MAD009247 | <i>ITGA1</i>     | -4440.1  | -4455.39 | 3.20E-08 | 7.38E-07 |
| MAD004833 | <i>POGZ</i>      | -2204.84 | -2220    | 3.69E-08 | 8.47E-07 |
| MAD001785 | <i>RIMBP2</i>    | -9072.85 | -9087.97 | 3.83E-08 | 8.77E-07 |
| MAD009547 |                  | -1191.93 | -1207    | 4.01E-08 | 9.13E-07 |
| MAD012727 | <i>PABPC1L</i>   | -3837.76 | -3852.7  | 4.61E-08 | 1.05E-06 |
| MAD006594 | <i>STEAP2</i>    | -3024.05 | -3038.89 | 5.09E-08 | 1.15E-06 |
| MAD010717 | <i>PDLIM7</i>    | -2217.91 | -2232.75 | 5.10E-08 | 1.15E-06 |
| MAD002835 | <i>MYB</i>       | -2813.82 | -2828.57 | 5.62E-08 | 1.26E-06 |
| MAD005788 | <i>SELIL3</i>    | -4108.72 | -4123.39 | 6.11E-08 | 1.37E-06 |
| MAD002056 | <i>LXN</i>       | -1073.18 | -1087.67 | 7.30E-08 | 1.62E-06 |
| MAD001360 | <i>NUSAP1</i>    | -2635.94 | -2650.43 | 7.28E-08 | 1.62E-06 |
| MAD002261 | <i>IPO8</i>      | -4527.95 | -4542.16 | 9.80E-08 | 2.17E-06 |
| MAD001217 | <i>RB1CC1</i>    | -6772.21 | -6786.33 | 1.08E-07 | 2.37E-06 |
| MAD005132 | <i>RCN2</i>      | -1092.32 | -1106.23 | 1.34E-07 | 2.94E-06 |
| MAD001058 | <i>HOXA10</i>    | -1438.26 | -1452.01 | 1.58E-07 | 3.46E-06 |
| MAD003291 |                  | -3513.18 | -3526.91 | 1.60E-07 | 3.49E-06 |
| MAD006347 | <i>TMC7</i>      | -2144.54 | -2158.23 | 1.68E-07 | 3.65E-06 |
| MAD007543 |                  | -2787.92 | -2801.56 | 1.76E-07 | 3.82E-06 |
| MAD003737 | <i>SCGN</i>      | -1607.13 | -1620.67 | 1.95E-07 | 4.21E-06 |
| MAD003779 |                  | -1309.35 | -1322.86 | 2.00E-07 | 4.30E-06 |
| MAD011775 | <i>MORN3</i>     | -1418.33 | -1431.8  | 2.10E-07 | 4.50E-06 |

|           |                 |          |          |          |          |
|-----------|-----------------|----------|----------|----------|----------|
| MAD003473 | <i>STXBP5</i>   | -6115.29 | -6128.73 | 2.18E-07 | 4.65E-06 |
| MAD014075 | <i>NOLCI</i>    | -3609.64 | -3623.03 | 2.30E-07 | 4.89E-06 |
| MAD006791 | <i>SIN3B</i>    | -4449.61 | -4462.97 | 2.37E-07 | 5.01E-06 |
| MAD001164 | <i>ATP6V1H</i>  | -2435.65 | -2448.67 | 3.33E-07 | 7.03E-06 |
| MAD007857 | <i>ARFGEF2</i>  | -9556.58 | -9569.59 | 3.41E-07 | 7.17E-06 |
| MAD006381 | <i>OSR2</i>     | -1764.13 | -1777.02 | 3.82E-07 | 8.01E-06 |
| MAD012113 | <i>EIF2A</i>    | -3188.73 | -3201.58 | 3.98E-07 | 8.32E-06 |
| MAD001078 | <i>NGLY1</i>    | -3034.58 | -3047.41 | 4.09E-07 | 8.52E-06 |
| MAD012432 | <i>CSDE1</i>    | -3448.05 | -3460.54 | 5.79E-07 | 1.20E-05 |
| MAD014654 | <i>NEDD4L</i>   | -4164.77 | -4177.25 | 5.82E-07 | 1.20E-05 |
| MAD006448 | <i>DTNA</i>     | -3232.4  | -3244.78 | 6.50E-07 | 1.34E-05 |
| MAD005245 | <i>CHRNA5</i>   | -1891.47 | -1903.37 | 1.06E-06 | 2.18E-05 |
| MAD002557 | <i>COG5</i>     | -2165.32 | -2177.22 | 1.07E-06 | 2.19E-05 |
| MAD007241 | <i>MYO7A</i>    | -11248.6 | -11260.5 | 1.08E-06 | 2.20E-05 |
| MAD008225 | <i>MORC3</i>    | -4895.55 | -4907.31 | 1.23E-06 | 2.51E-05 |
| MAD000390 | <i>RPE65</i>    | -3098.69 | -3110.41 | 1.29E-06 | 2.59E-05 |
| MAD010315 | <i>ATG9A</i>    | -3668.03 | -3679.75 | 1.28E-06 | 2.59E-05 |
| MAD004931 | <i>TYRP1</i>    | -2372.49 | -2383.67 | 2.26E-06 | 4.54E-05 |
| MAD005924 | <i>TCEANC2</i>  | -1296.57 | -1307.25 | 3.81E-06 | 7.63E-05 |
| MAD008716 | <i>LGR5</i>     | -3930.52 | -3941.09 | 4.27E-06 | 8.52E-05 |
| MAD010606 | <i>PSD2</i>     | -3132.72 | -3143.24 | 4.48E-06 | 8.93E-05 |
| MAD003810 | <i>LRRTM4</i>   | -1048.63 | -1058.71 | 7.15E-06 | 0.000142 |
| MAD005207 |                 | -3030.68 | -3040.5  | 9.33E-06 | 0.000185 |
| MAD000005 | <i>DPP10</i>    | -3244.38 | -3254.15 | 9.79E-06 | 0.000193 |
| MAD007152 | <i>TPRG1L</i>   | -819.341 | -829.061 | 1.04E-05 | 0.000204 |
| MAD013593 | <i>ARL6</i>     | -1019.4  | -1028.86 | 1.37E-05 | 0.000267 |
| MAD005911 | <i>SGIP1</i>    | -1404.05 | -1413.46 | 1.44E-05 | 0.000281 |
| MAD006217 |                 | -1684.28 | -1693.63 | 1.54E-05 | 0.0003   |
| MAD012032 | <i>RNF214</i>   | -2435.65 | -2444.97 | 1.58E-05 | 0.000306 |
| MAD006049 | <i>HAND2</i>    | -629.246 | -638.463 | 1.76E-05 | 0.00034  |
| MAD011589 | <i>C5</i>       | -7940.38 | -7949.52 | 1.90E-05 | 0.000366 |
| MAD013570 | <i>TIMMDC1</i>  | -882.785 | -891.895 | 1.97E-05 | 0.000378 |
| MAD012854 | <i>TTC25</i>    | -1938.27 | -1947.32 | 2.09E-05 | 0.000401 |
| MAD001468 | <i>PLEKHD1</i>  | -2291.43 | -2300.4  | 2.27E-05 | 0.000433 |
| MAD013889 | <i>ZPLD1</i>    | -2537.08 | -2546.04 | 2.31E-05 | 0.00044  |
| MAD000777 | <i>TMC6</i>     | -4172.55 | -4181.36 | 2.67E-05 | 0.000507 |
| MAD005240 | <i>LRRK1</i>    | -9747.32 | -9756.06 | 2.91E-05 | 0.000549 |
| MAD005549 | <i>SNAPC4</i>   | -2627.29 | -2635.95 | 3.16E-05 | 0.000596 |
| MAD001891 | <i>CEP55</i>    | -3178.22 | -3186.85 | 3.25E-05 | 0.00061  |
| MAD010926 | <i>DNAH12</i>   | -9279.73 | -9288.3  | 3.47E-05 | 0.000649 |
| MAD010901 | <i>CRBN</i>     | -1793.59 | -1802.09 | 3.70E-05 | 0.000692 |
| MAD009374 |                 | -1583.62 | -1592.08 | 3.92E-05 | 0.000729 |
| MAD009704 | <i>FAM189A1</i> | -1404.18 | -1412.62 | 4.00E-05 | 0.000742 |
| MAD010814 |                 | -940.336 | -948.604 | 4.78E-05 | 0.000884 |
| MAD012899 |                 | -896.923 | -905.127 | 5.11E-05 | 0.000942 |
| MAD008091 | <i>CFAP46</i>   | -522.551 | -530.715 | 5.33E-05 | 0.000979 |
| MAD000280 | <i>MAMLD1</i>   | -5470.59 | -5478.68 | 5.76E-05 | 0.001055 |
| MAD008760 | <i>PTPRD</i>    | -9103.58 | -9111.59 | 6.27E-05 | 0.001146 |

|               |                    |          |          |          |          |
|---------------|--------------------|----------|----------|----------|----------|
| MAD001466     | <i>RYR3</i>        | -19267   | -19275   | 6.34E-05 | 0.001155 |
| MAD005525     | <i>PKN3</i>        | -4537.25 | -4545.02 | 8.08E-05 | 0.001468 |
| MAD002417     |                    | -2585.55 | -2593.3  | 8.28E-05 | 0.001499 |
| MAD011689     | <i>FNDC5</i>       | -789.866 | -797.591 | 8.47E-05 | 0.001529 |
| MAD007568     | <i>FGF</i>         | -2849.5  | -2857.1  | 9.64E-05 | 0.001735 |
| MAD011770     | <i>TCTN2</i>       | -1168    | -1175.45 | 0.000113 | 0.002027 |
| MAD013589     | <i>MAEL</i>        | -1422.69 | -1430.08 | 0.000121 | 0.00216  |
| MAD005627     | <i>SEC16A</i>      | -9807    | -9814.22 | 0.000145 | 0.002585 |
| MAD002637     | <i>TMEM63A</i>     | -3543.43 | -3550.62 | 0.000151 | 0.002679 |
| MAD007000     | <i>TXN2</i>        | -744.008 | -751.164 | 0.000155 | 0.002746 |
| MAD009517     | <i>EEF1D</i>       | -3072.89 | -3079.86 | 0.000188 | 0.003331 |
| MAD006419     | <i>CSPP1</i>       | -5503.77 | -5510.72 | 0.000193 | 0.003405 |
| MAD005864     |                    | -3193.77 | -3200.71 | 0.000195 | 0.003423 |
| MAD008689     | <i>CAND1</i>       | -5059.08 | -5065.98 | 0.000203 | 0.003561 |
| MAD004975     |                    | -4070.8  | -4077.67 | 0.00021  | 0.003669 |
| MAD001777     | <i>EP400</i>       | -15891.9 | -15898.6 | 0.000253 | 0.004402 |
| MAD006369     | <i>MTFR1</i>       | -1927.66 | -1934.27 | 0.000275 | 0.004779 |
| MAD014541     | <i>EPHB6</i>       | -5092.45 | -5099.04 | 0.000281 | 0.004875 |
| MAD014880     | <i>SYT9</i>        | -1306.52 | -1313.09 | 0.000289 | 0.004983 |
| MAD006651     | <i>ETS1</i>        | -1586.68 | -1593.06 | 0.000355 | 0.006113 |
| MAD009531     | <i>SUGP1</i>       | -1848.97 | -1854.86 | 0.0006   | 0.010299 |
| MAD006636     | <i>SPA17</i>       | -365.234 | -370.807 | 0.000842 | 0.014424 |
| MAD007697     | <i>C1AH12orf50</i> | -499.198 | -504.725 | 0.000885 | 0.015115 |
| MAD009899     | <i>NUP155</i>      | -5435.02 | -5440.39 | 0.001056 | 0.017982 |
| MAD003197     | <i>TADA2A</i>      | -1772.39 | -1777.68 | 0.001135 | 0.019271 |
| MAD008056     |                    | -1130.08 | -1135.09 | 0.001553 | 0.026298 |
| MAD001069     | <i>MRPL3</i>       | -1185.59 | -1190.53 | 0.001671 | 0.028202 |
| MAD002966     | <i>YTHDF1</i>      | -2474.18 | -2479.07 | 0.001769 | 0.029781 |
| MAD009788     | <i>GHR</i>         | -2652.97 | -2657.72 | 0.002037 | 0.034191 |
| MAD006239     | <i>PTCD1</i>       | -3291.11 | -3295.87 | 0.002044 | 0.034222 |
| MAD003054     | <i>DDHD2</i>       | -2541.07 | -2545.74 | 0.002233 | 0.037273 |
| MAD000663     | <i>DOCK11</i>      | -6913    | -6917.61 | 0.002395 | 0.039876 |
| MAD011593     | <i>LHX6</i>        | -931.551 | -935.979 | 0.002923 | 0.048531 |
| <b>Rufico</b> |                    |          |          |          |          |
| PRU012784     | <i>INSR</i>        | -7519.43 | -7712.32 | 6.88E-86 | 4.12E-82 |
| PRU012309     | <i>BRCA2</i>       | -17984.1 | -18164   | 3.15E-80 | 9.45E-77 |
| PRU005201     | <i>DNAH3</i>       | -21640.4 | -21786.4 | 1.79E-65 | 3.58E-62 |
| PRU004086     | <i>PDE6B</i>       | -4629.05 | -4772.59 | 2.16E-64 | 3.23E-61 |
| PRU013106     | <i>ADAMTS8</i>     | -4010.64 | -4153.42 | 4.65E-64 | 5.58E-61 |
| PRU000634     | <i>DOCK3</i>       | -9868.1  | -10007.1 | 2.00E-62 | 1.99E-59 |
| PRU013114     | <i>RBBP8</i>       | -4112.74 | -4247.59 | 1.32E-60 | 1.13E-57 |
| PRU004359     | <i>MFSD4</i>       | -2677.98 | -2809.43 | 3.97E-59 | 2.98E-56 |
| PRU014137     | <i>NUP98</i>       | -8319.88 | -8447.17 | 2.60E-57 | 1.73E-54 |
| PRU005721     | <i>MYO5C</i>       | -4770.46 | -4890.32 | 4.52E-54 | 2.71E-51 |
| PRU013479     | <i>CD101</i>       | -4309.73 | -4429.4  | 5.48E-54 | 2.99E-51 |
| PRU011694     | <i>NRP1</i>        | -5070.35 | -5185.06 | 7.99E-52 | 3.99E-49 |
| PRU007489     | <i>KPNA2</i>       | -3068.21 | -3180.18 | 1.25E-50 | 5.77E-48 |
| PRU002696     | <i>CAMTA1</i>      | -7456.53 | -7564.03 | 1.11E-48 | 4.76E-46 |

|           |                 |          |          |          |          |
|-----------|-----------------|----------|----------|----------|----------|
| PRU013173 | <i>PDE3A</i>    | -4420.36 | -4525.89 | 8.06E-48 | 3.22E-45 |
| PRU001767 | <i>MOXD1</i>    | -3024.69 | -3128.19 | 6.19E-47 | 2.32E-44 |
| PRU009551 | <i>FAR1</i>     | -2834.03 | -2937.35 | 7.40E-47 | 2.61E-44 |
| PRU006297 | <i>BIRC6</i>    | -21110.8 | -21213   | 2.10E-46 | 6.99E-44 |
| PRU003349 | <i>ADCY2</i>    | -5137.16 | -5238.71 | 4.41E-46 | 1.39E-43 |
| PRU009086 | <i>DHTKD1</i>   | -4781.9  | -4879.2  | 3.15E-44 | 9.44E-42 |
| PRU012649 |                 | -2594.63 | -2690.36 | 1.53E-43 | 4.37E-41 |
| PRU012372 | <i>HEPHL1</i>   | -5614.79 | -5707.6  | 2.88E-42 | 7.86E-40 |
| PRU001958 | <i>PCDH15</i>   | -10266.3 | -10359   | 3.29E-42 | 8.58E-40 |
| PRU011496 | <i>BLZF1</i>    | -2218.76 | -2311.06 | 4.77E-42 | 1.19E-39 |
| PRU013650 | <i>RGL1</i>     | -3645.4  | -3737.35 | 6.84E-42 | 1.64E-39 |
| PRU002256 | <i>SLCO2A1</i>  | -3646.78 | -3738.6  | 7.75E-42 | 1.79E-39 |
| PRU002634 | <i>ASHIL</i>    | -17181.1 | -17269   | 3.73E-40 | 8.28E-38 |
| PRU009304 | <i>RIF1</i>     | -6526.55 | -6613.44 | 1.10E-39 | 2.36E-37 |
| PRU007229 |                 | -2309.24 | -2395.58 | 1.93E-39 | 3.99E-37 |
| PRU001421 | <i>FAM114A2</i> | -2342.15 | -2427.5  | 5.20E-39 | 1.04E-36 |
| PRU004109 | <i>AP5M1</i>    | -2036.83 | -2120.55 | 2.68E-38 | 5.19E-36 |
| PRU006558 | <i>SNX9</i>     | -2822.65 | -2902.94 | 8.43E-37 | 1.58E-34 |
| PRU004700 | <i>ALDH18A1</i> | -4240.73 | -4320.26 | 1.82E-36 | 3.30E-34 |
| PRU004116 | <i>CGRRF1</i>   | -1966.2  | -2044.77 | 4.73E-36 | 8.34E-34 |
| PRU009409 | <i>GTF2E2</i>   | -1628.88 | -1707.03 | 7.30E-36 | 1.25E-33 |
| PRU005802 | <i>TRIP4</i>    | -3335.21 | -3413.11 | 9.37E-36 | 1.55E-33 |
| PRU003488 | <i>KPNA6</i>    | -3040.6  | -3118.48 | 9.55E-36 | 1.55E-33 |
| PRU008210 | <i>RIPK1</i>    | -4672.68 | -4749.65 | 2.38E-35 | 3.65E-33 |
| PRU002437 | <i>MCM3</i>     | -4648.58 | -4725.58 | 2.33E-35 | 3.65E-33 |
| PRU003556 | <i>SLC4A9</i>   | -4770.31 | -4846.38 | 5.91E-35 | 8.86E-33 |
| PRU004917 | <i>POFUT2</i>   | -2342.75 | -2418.63 | 7.16E-35 | 1.05E-32 |
| PRU007482 | <i>NOL11</i>    | -3899.96 | -3975.51 | 9.91E-35 | 1.41E-32 |
| PRU005677 | <i>IQCH</i>     | -3572.78 | -3648.18 | 1.16E-34 | 1.61E-32 |
| PRU001236 | <i>SPTAN1</i>   | -12111.4 | -12185.9 | 2.82E-34 | 3.84E-32 |
| PRU000334 | <i>RIMBP2</i>   | -9008.84 | -9082.8  | 4.98E-34 | 6.63E-32 |
| PRU004440 | <i>INPP5D</i>   | -6100.53 | -6174.2  | 6.67E-34 | 8.70E-32 |
| PRU006158 | <i>CRISPLD2</i> | -3237.13 | -3309.62 | 2.15E-33 | 2.75E-31 |
| PRU011701 | <i>ARMC4</i>    | -3019.47 | -3091.25 | 4.44E-33 | 5.54E-31 |
| PRU003708 | <i>SLC39A8</i>  | -2309.53 | -2379.6  | 2.48E-32 | 3.04E-30 |
| PRU013258 | <i>CDK5RAP1</i> | -2594.45 | -2663.89 | 4.67E-32 | 5.60E-30 |
| PRU001619 | <i>SVIL</i>     | -9443.35 | -9511.88 | 1.17E-31 | 1.38E-29 |
| PRU013109 | <i>GRIK4</i>    | -1991.75 | -2060.23 | 1.23E-31 | 1.41E-29 |
| PRU012239 | <i>PRRC2C</i>   | -13390.2 | -13458.6 | 1.37E-31 | 1.55E-29 |
| PRU012126 | <i>COL14A1</i>  | -7076.94 | -7145.17 | 1.59E-31 | 1.77E-29 |
| PRU002346 | <i>MYT1</i>     | -4975.59 | -5043.15 | 3.08E-31 | 3.36E-29 |
| PRU005625 | <i>CDK15</i>    | -2191.83 | -2257.98 | 1.28E-30 | 1.37E-28 |
| PRU002435 |                 | -1992.53 | -2057.94 | 2.69E-30 | 2.83E-28 |
| PRU014983 | <i>EDIL3</i>    | -2094.56 | -2159.72 | 3.49E-30 | 3.61E-28 |
| PRU007795 | <i>CASP9</i>    | -2684.49 | -2748.25 | 1.43E-29 | 1.46E-27 |
| PRU000015 | <i>THOC5</i>    | -4234.25 | -4297.48 | 2.44E-29 | 2.44E-27 |
| PRU005546 | <i>IFIH1</i>    | -5185.66 | -5248.8  | 2.67E-29 | 2.62E-27 |
| PRU014010 | <i>TRIM2</i>    | -3967.01 | -4029.97 | 3.20E-29 | 3.09E-27 |

|           |                   |          |          |          |          |
|-----------|-------------------|----------|----------|----------|----------|
| PRU003748 | <i>POLR3F</i>     | -1581.81 | -1644.39 | 4.67E-29 | 4.44E-27 |
| PRU010920 | <i>RPSA</i>       | -1644.5  | -1706.99 | 5.15E-29 | 4.82E-27 |
| PRU014698 | <i>FAM13A</i>     | -4559.56 | -4621.34 | 1.05E-28 | 9.66E-27 |
| PRU006536 | <i>ENPP1</i>      | -2396.92 | -2458.69 | 1.07E-28 | 9.69E-27 |
| PRU011154 | <i>RSPRY1</i>     | -2819.03 | -2880.53 | 1.39E-28 | 1.24E-26 |
| PRU004387 |                   | -4972.57 | -5033.44 | 2.64E-28 | 2.33E-26 |
| PRU000066 | <i>CHEK2</i>      | -3123.95 | -3184.54 | 3.51E-28 | 3.05E-26 |
| PRU003061 | <i>SLC6A13</i>    | -3134.73 | -3195.1  | 4.35E-28 | 3.67E-26 |
| PRU007598 | <i>HPS5</i>       | -2881.13 | -2941.5  | 4.32E-28 | 3.67E-26 |
| PRU012477 | <i>FAM35A</i>     | -3257.68 | -3317.75 | 5.92E-28 | 4.93E-26 |
| PRU009483 | <i>ENTPD6</i>     | -2186.59 | -2246.04 | 1.10E-27 | 9.03E-26 |
| PRU003282 | <i>DDX20</i>      | -4098.96 | -4158.26 | 1.29E-27 | 1.04E-25 |
| PRU000487 | <i>CBL</i>        | -4480.71 | -4539.74 | 1.69E-27 | 1.35E-25 |
| PRU007375 | <i>CFAP61</i>     | -7604.65 | -7662.62 | 4.89E-27 | 3.86E-25 |
| PRU001362 | <i>ECT2</i>       | -4956.09 | -5013.18 | 1.19E-26 | 9.29E-25 |
| PRU008441 | <i>TERF2</i>      | -2455.8  | -2510.85 | 9.35E-26 | 7.19E-24 |
| PRU000329 | <i>KNTC1</i>      | -12471.5 | -12526.2 | 1.27E-25 | 9.66E-24 |
| PRU008182 | <i>AGFG1</i>      | -2515.51 | -2569.73 | 2.15E-25 | 1.61E-23 |
| PRU010456 | <i>PON2</i>       | -1947.03 | -2001.16 | 2.36E-25 | 1.74E-23 |
| PRU010779 | <i>HOOK1</i>      | -2301.09 | -2355.19 | 2.41E-25 | 1.76E-23 |
| PRU001603 | <i>ACVR2B</i>     | -2066.73 | -2120.13 | 4.93E-25 | 3.56E-23 |
| PRU009696 | <i>ABHD12</i>     | -1723.48 | -1776.59 | 6.55E-25 | 4.67E-23 |
| PRU007181 | <i>SCPEP1</i>     | -1983.95 | -2036.72 | 9.23E-25 | 6.51E-23 |
| PRU014321 | <i>NEB</i>        | -19291.9 | -19344.1 | 1.74E-24 | 1.21E-22 |
| PRU006673 | <i>PABPC1</i>     | -2635.72 | -2687.79 | 1.90E-24 | 1.31E-22 |
| PRU012690 | <i>C5H14orf79</i> | -2272.01 | -2324    | 2.04E-24 | 1.39E-22 |
| PRU009297 | <i>CSTF2</i>      | -3124.42 | -3175.95 | 3.24E-24 | 2.18E-22 |
| PRU005332 | <i>NEURL1</i>     | -1836.49 | -1887.86 | 3.85E-24 | 2.56E-22 |
| PRU012903 | <i>PPP1R12A</i>   | -4162.33 | -4213.65 | 4.05E-24 | 2.65E-22 |
| PRU004175 | <i>FUT10</i>      | -2753.9  | -2805.21 | 4.06E-24 | 2.65E-22 |
| PRU012520 | <i>DDX19A</i>     | -2244.05 | -2294.97 | 6.02E-24 | 3.88E-22 |
| PRU000282 | <i>IQCD</i>       | -2378.38 | -2428.45 | 1.41E-23 | 9.00E-22 |
| PRU011583 | <i>LTN1</i>       | -5782.56 | -5832.5  | 1.61E-23 | 1.02E-21 |
| PRU002165 | <i>RALGAPA2</i>   | -10241.5 | -10290.8 | 3.11E-23 | 1.94E-21 |
| PRU009259 | <i>TBCE</i>       | -2840.41 | -2888.03 | 1.67E-22 | 1.03E-20 |
| PRU003804 | <i>DOPEY2</i>     | -10894.2 | -10941.8 | 1.74E-22 | 1.06E-20 |
| PRU008552 | <i>MRPL1</i>      | -1721.48 | -1768.95 | 1.96E-22 | 1.18E-20 |
| PRU014347 | <i>LRBA</i>       | -8267.12 | -8313.83 | 4.21E-22 | 2.52E-20 |
| PRU006178 | <i>ANKRD27</i>    | -5378.78 | -5425.42 | 4.53E-22 | 2.69E-20 |
| PRU005720 | <i>GNB5</i>       | -2211.53 | -2257.75 | 6.91E-22 | 4.06E-20 |
| PRU013531 | <i>ST7</i>        | -2668.97 | -2715.04 | 8.08E-22 | 4.70E-20 |
| PRU006038 | <i>ITGA11</i>     | -3838.87 | -3884.52 | 1.24E-21 | 7.07E-20 |
| PRU003652 | <i>GNPTAB</i>     | -6511.27 | -6556.92 | 1.24E-21 | 7.07E-20 |
| PRU012475 | <i>ASAH2</i>      | -4162.77 | -4208.28 | 1.42E-21 | 8.03E-20 |
| PRU011802 | <i>SMAD5</i>      | -2322.28 | -2367.43 | 2.05E-21 | 1.15E-19 |
| PRU004262 |                   | -945.447 | -990.491 | 2.28E-21 | 1.26E-19 |
| PRU003536 | <i>MAP4K5</i>     | -2783.42 | -2828.29 | 2.69E-21 | 1.48E-19 |
| PRU011303 | <i>TEC</i>        | -3503.21 | -3548.06 | 2.77E-21 | 1.51E-19 |

|           |                    |          |          |          |          |
|-----------|--------------------|----------|----------|----------|----------|
| PRU008849 | <i>SLC35D2</i>     | -1306.39 | -1350.77 | 4.45E-21 | 2.40E-19 |
| PRU001903 | <i>EPB41</i>       | -4181.82 | -4226.17 | 4.62E-21 | 2.47E-19 |
| PRU005741 | <i>TRPM3</i>       | -7733.36 | -7777.47 | 5.89E-21 | 3.12E-19 |
| PRU007518 | <i>ASB11</i>       | -2102.97 | -2146.98 | 6.48E-21 | 3.40E-19 |
| PRU000113 | <i>ADGRD1</i>      | -4194.58 | -4238.31 | 8.54E-21 | 4.45E-19 |
| PRU009446 | <i>CAST</i>        | -2713.07 | -2756.46 | 1.21E-20 | 6.27E-19 |
| PRU005730 | <i>PRTG</i>        | -5560.39 | -5603.66 | 1.37E-20 | 7.02E-19 |
| PRU008289 | <i>PIGN</i>        | -5315.97 | -5358.93 | 1.87E-20 | 9.50E-19 |
| PRU007719 | <i>ADGRF5</i>      | -7010.32 | -7053.23 | 1.97E-20 | 9.83E-19 |
| PRU012334 | <i>DYNC2H1</i>     | -16947.9 | -16990.9 | 1.96E-20 | 9.83E-19 |
| PRU008466 | <i>CSPP1</i>       | -5466.39 | -5509.1  | 2.41E-20 | 1.19E-18 |
| PRU012014 | <i>EYA3</i>        | -2152.54 | -2195.23 | 2.48E-20 | 1.21E-18 |
| PRU005927 | <i>SGSM2</i>       | -5656.35 | -5699.03 | 2.48E-20 | 1.21E-18 |
| PRU014121 | <i>CPTP</i>        | -1186.51 | -1229.03 | 2.93E-20 | 1.42E-18 |
| PRU011917 | <i>TBCK</i>        | -2516.08 | -2558.47 | 3.35E-20 | 1.60E-18 |
| PRU001130 | <i>CWH43</i>       | -2264.41 | -2306.37 | 5.12E-20 | 2.44E-18 |
| PRU003060 |                    | -2852.1  | -2893.25 | 1.17E-19 | 5.51E-18 |
| PRU009028 | <i>TJP2</i>        | -6074.39 | -6115.49 | 1.23E-19 | 5.75E-18 |
| PRU001616 | <i>KLF6</i>        | -1375.19 | -1415.72 | 2.19E-19 | 1.02E-17 |
| PRU013613 | <i>ACE</i>         | -6992.22 | -7032.74 | 2.22E-19 | 1.02E-17 |
| PRU008227 | <i>RNF144B</i>     | -1836.74 | -1877.08 | 2.66E-19 | 1.22E-17 |
| PRU008482 | <i>DTNA</i>        | -3202.75 | -3242.63 | 4.22E-19 | 1.92E-17 |
| PRU012940 | <i>CA2</i>         | -910.479 | -950.32  | 4.40E-19 | 1.98E-17 |
| PRU013079 | <i>SNX19</i>       | -3662.44 | -3701.96 | 6.10E-19 | 2.73E-17 |
| PRU011706 | <i>ARHGAP21</i>    | -9381.37 | -9420.2  | 1.22E-18 | 5.40E-17 |
| PRU010966 | <i>AKAP9</i>       | -8776.79 | -8815.09 | 2.10E-18 | 9.26E-17 |
| PRU010538 | <i>OSBPL10</i>     | -3545.34 | -3582.84 | 4.71E-18 | 2.06E-16 |
| PRU008113 | <i>CALB1</i>       | -991.815 | -1028.38 | 1.22E-17 | 5.28E-16 |
| PRU006642 |                    | -563.168 | -598.89  | 2.85E-17 | 1.23E-15 |
| PRU002757 | <i>FRMPD4</i>      | -5866.27 | -5901.87 | 3.22E-17 | 1.38E-15 |
| PRU007323 | <i>SLX4IP</i>      | -2230.94 | -2265.93 | 5.97E-17 | 2.54E-15 |
| PRU002856 | <i>SLC22A16</i>    | -2711.32 | -2745.71 | 1.10E-16 | 4.65E-15 |
| PRU005372 | <i>GAB3</i>        | -1817.82 | -1852.17 | 1.14E-16 | 4.78E-15 |
| PRU006440 | <i>MMGT1</i>       | -874.484 | -908.572 | 1.50E-16 | 6.22E-15 |
| PRU002078 | <i>C5H14orf159</i> | -1781.12 | -1815.01 | 1.82E-16 | 7.53E-15 |
| PRU008573 | <i>PDXK</i>        | -1328.99 | -1362.63 | 2.37E-16 | 9.74E-15 |
| PRU002507 | <i>EYA2</i>        | -2930.34 | -2963.94 | 2.46E-16 | 1.00E-14 |
| PRU000521 | <i>CNTN3</i>       | -4181.14 | -4214.67 | 2.63E-16 | 1.06E-14 |
| PRU008163 | <i>ARNT</i>        | -3373.47 | -3406.53 | 4.25E-16 | 1.71E-14 |
| PRU000873 | <i>NDC1</i>        | -2632.74 | -2665.63 | 5.05E-16 | 2.02E-14 |
| PRU014116 | <i>PLCH2</i>       | -4259.23 | -4291.74 | 7.45E-16 | 2.96E-14 |
| PRU001622 | <i>YMEIL1</i>      | -2663.6  | -2696.07 | 7.78E-16 | 3.07E-14 |
| PRU001872 | <i>PSMB2</i>       | -816.902 | -849.358 | 7.83E-16 | 3.07E-14 |
| PRU001426 | <i>ADAM19</i>      | -4101.39 | -4133.78 | 8.38E-16 | 3.26E-14 |
| PRU003686 | <i>SLC4A4</i>      | -5004.58 | -5036.94 | 8.63E-16 | 3.34E-14 |
| PRU004263 | <i>PTH1R</i>       | -1992.32 | -2024.64 | 8.94E-16 | 3.44E-14 |
| PRU005617 | <i>CCDC93</i>      | -3381.04 | -3413.18 | 1.08E-15 | 4.11E-14 |
| PRU006849 | <i>GALNT16</i>     | -2322.14 | -2354.19 | 1.18E-15 | 4.48E-14 |

|           |                |          |          |          |          |
|-----------|----------------|----------|----------|----------|----------|
| PRU004474 | <i>FADS2</i>   | -2533.75 | -2565.3  | 1.96E-15 | 7.37E-14 |
| PRU014763 | <i>ZDHHC13</i> | -1376.94 | -1408.26 | 2.49E-15 | 9.33E-14 |
| PRU004313 | <i>NFYA</i>    | -1356.17 | -1387.44 | 2.63E-15 | 9.77E-14 |
| PRU011505 | <i>UPK1B</i>   | -1869.86 | -1901    | 2.98E-15 | 1.10E-13 |
| PRU011472 | <i>KPNA4</i>   | -2746.92 | -2777.55 | 5.00E-15 | 1.84E-13 |
| PRU008123 | <i>CERS2</i>   | -1299.99 | -1330.52 | 5.52E-15 | 2.02E-13 |
| PRU012941 |                | -1067.77 | -1097    | 2.07E-14 | 7.52E-13 |
| PRU011641 | <i>CBLB</i>    | -5296.25 | -5325.1  | 3.06E-14 | 1.10E-12 |
| PRU008831 | <i>FANCM</i>   | -2780.41 | -2808.96 | 4.15E-14 | 1.49E-12 |
| PRU005735 | <i>ADAM10</i>  | -3057.48 | -3085.42 | 7.72E-14 | 2.75E-12 |
| PRU014030 | <i>DOCK9</i>   | -10084.6 | -10112.5 | 8.09E-14 | 2.87E-12 |
| PRU005297 | <i>MYH11</i>   | -9940.97 | -9968.64 | 1.02E-13 | 3.60E-12 |
| PRU008205 |                | -3340.76 | -3368.35 | 1.11E-13 | 3.87E-12 |
| PRU004587 | <i>SCAP</i>    | -5996.7  | -6024.21 | 1.19E-13 | 4.16E-12 |
| PRU002577 | <i>DSC1</i>    | -2707.23 | -2734.73 | 1.20E-13 | 4.16E-12 |
| PRU006077 | <i>USP10</i>   | -3048.9  | -3076.03 | 1.76E-13 | 6.01E-12 |
| PRU004372 | <i>PSCA</i>    | -819.822 | -846.956 | 1.75E-13 | 6.01E-12 |
| PRU009264 | <i>AICDA</i>   | -1116.4  | -1143.36 | 2.09E-13 | 7.12E-12 |
| PRU002689 | <i>SCGN</i>    | -1590.95 | -1617.76 | 2.43E-13 | 8.23E-12 |
| PRU005175 | <i>SMURF1</i>  | -3357.21 | -3383.9  | 2.77E-13 | 9.33E-12 |
| PRU006107 | <i>EXOC3L1</i> | -3751.29 | -3777.89 | 3.03E-13 | 1.01E-11 |
| PRU012712 | <i>RBM27</i>   | -3681.92 | -3708.41 | 3.38E-13 | 1.12E-11 |
| PRU006511 | <i>DLG3</i>    | -3858.14 | -3884.53 | 3.74E-13 | 1.24E-11 |
| PRU004826 | <i>FGFR1OP</i> | -1227.13 | -1253.16 | 5.39E-13 | 1.78E-11 |
| PRU006425 | <i>CHMP1B</i>  | -866.751 | -892.767 | 5.46E-13 | 1.79E-11 |
| PRU004250 | <i>TARBP1</i>  | -3276.27 | -3302.1  | 6.65E-13 | 2.17E-11 |
| PRU007617 |                | -2238.95 | -2264.76 | 6.76E-13 | 2.19E-11 |
| PRU003218 | <i>NFAT5</i>   | -7642.22 | -7667.75 | 8.91E-13 | 2.87E-11 |
| PRU008988 | <i>TET2</i>    | -7566.45 | -7591.97 | 9.06E-13 | 2.90E-11 |
| PRU003430 |                | -1894.7  | -1920.18 | 9.49E-13 | 3.03E-11 |
| PRU010282 | <i>SSFA2</i>   | -5949.16 | -5974.44 | 1.15E-12 | 3.65E-11 |
| PRU013265 | <i>BPIFB2</i>  | -2726.92 | -2751.66 | 2.01E-12 | 6.33E-11 |
| PRU007689 | <i>BRF1</i>    | -2127.77 | -2152.36 | 2.34E-12 | 7.34E-11 |
| PRU009884 | <i>GON4L</i>   | -8120.77 | -8144.68 | 4.69E-12 | 1.46E-10 |
| PRU011912 | <i>UBN2</i>    | -5869.63 | -5893.49 | 4.95E-12 | 1.54E-10 |
| PRU003617 | <i>IL10RA</i>  | -4156.42 | -4180.05 | 6.18E-12 | 1.91E-10 |
| PRU011586 | <i>TTF2</i>    | -5642.15 | -5665.71 | 6.71E-12 | 2.06E-10 |
| PRU014657 | <i>PCID2</i>   | -2105.05 | -2128.43 | 8.03E-12 | 2.45E-10 |
| PRU008524 | <i>WBSCR17</i> | -1895.98 | -1919.35 | 8.11E-12 | 2.47E-10 |
| PRU009058 | <i>RBM26</i>   | -3752.9  | -3776.06 | 1.01E-11 | 3.05E-10 |
| PRU006699 | <i>FST</i>     | -2325.23 | -2348.24 | 1.17E-11 | 3.52E-10 |
| PRU014246 | <i>ABCG2</i>   | -3187.82 | -3210.3  | 2.00E-11 | 5.99E-10 |
| PRU003813 |                | -3779.51 | -3801.92 | 2.15E-11 | 6.40E-10 |
| PRU010991 | <i>NEK11</i>   | -3509.18 | -3531.43 | 2.55E-11 | 7.55E-10 |
| PRU009839 | <i>TRPM8</i>   | -3226.04 | -3248.18 | 2.83E-11 | 8.36E-10 |
| PRU011627 | <i>C1R</i>     | -4344.62 | -4366.61 | 3.32E-11 | 9.75E-10 |
| PRU014298 |                | -3214.62 | -3236.18 | 5.16E-11 | 1.51E-09 |
| PRU001117 | <i>WDR19</i>   | -6159.58 | -6181.03 | 5.81E-11 | 1.69E-09 |



|           |                   |          |          |          |          |
|-----------|-------------------|----------|----------|----------|----------|
| PRU001500 | <i>CENPC</i>      | -4249.85 | -4271.19 | 6.44E-11 | 1.87E-09 |
| PRU008082 | <i>IMPA1</i>      | -1286.6  | -1307.78 | 7.60E-11 | 2.19E-09 |
| PRU002953 |                   | -1215.15 | -1236.31 | 7.77E-11 | 2.23E-09 |
| PRU007378 | <i>TASP1</i>      | -2444.05 | -2464.68 | 1.34E-10 | 3.82E-09 |
| PRU006741 | <i>ZDHHC12</i>    | -825.726 | -845.758 | 2.46E-10 | 6.98E-09 |
| PRU000935 | <i>JAK1</i>       | -6363.73 | -6383.62 | 2.83E-10 | 8.01E-09 |
| PRU000161 | <i>FOXN4</i>      | -2744.68 | -2764.18 | 4.25E-10 | 1.20E-08 |
| PRU002791 | <i>PPEF2</i>      | -3168.94 | -3188.41 | 4.34E-10 | 1.22E-08 |
| PRU013485 | <i>TMEM14A</i>    | -721.716 | -740.913 | 5.78E-10 | 1.61E-08 |
| PRU002657 | <i>TP73</i>       | -3114.29 | -3133.43 | 6.14E-10 | 1.70E-08 |
| PRU002952 | <i>ARSD</i>       | -3872.25 | -3891.09 | 8.36E-10 | 2.31E-08 |
| PRU004414 | <i>CZH5orf34</i>  | -4013.41 | -4031.91 | 1.17E-09 | 3.23E-08 |
| PRU005657 | <i>TMBIM1</i>     | -2256.14 | -2274.53 | 1.32E-09 | 3.62E-08 |
| PRU012724 | <i>PPARGC1B</i>   | -5934.82 | -5953.05 | 1.55E-09 | 4.23E-08 |
| PRU007599 | <i>PHRF1</i>      | -7991.3  | -8009    | 2.67E-09 | 7.24E-08 |
| PRU013509 | <i>MYO6</i>       | -6318.02 | -6335.69 | 2.77E-09 | 7.49E-08 |
| PRU001335 | <i>ECELI</i>      | -2890.34 | -2907.81 | 3.41E-09 | 9.16E-08 |
| PRU012000 | <i>AADAT</i>      | -1182.7  | -1199.98 | 4.14E-09 | 1.11E-07 |
| PRU010147 | <i>NPNT</i>       | -2131.09 | -2148.3  | 4.40E-09 | 1.17E-07 |
| PRU012787 |                   | -5127.36 | -5144.57 | 4.43E-09 | 1.18E-07 |
| PRU010197 |                   | -3220.88 | -3237.98 | 4.96E-09 | 1.31E-07 |
| PRU010219 | <i>ITGB5</i>      | -3949.71 | -3966.76 | 5.23E-09 | 1.37E-07 |
| PRU012051 | <i>DNALI1</i>     | -767.713 | -784.656 | 5.84E-09 | 1.53E-07 |
| PRU009305 | <i>B3GNTL1</i>    | -786.634 | -803.514 | 6.23E-09 | 1.62E-07 |
| PRU013472 | <i>NSUN3</i>      | -1931.4  | -1948.28 | 6.23E-09 | 1.62E-07 |
| PRU006234 | <i>YIPF4</i>      | -883.647 | -900.35  | 7.48E-09 | 1.93E-07 |
| PRU002892 | <i>MDM2</i>       | -1403.06 | -1419.57 | 9.09E-09 | 2.34E-07 |
| PRU000380 | <i>DCLRE1A</i>    | -5788.84 | -5805.12 | 1.16E-08 | 2.97E-07 |
| PRU003826 | <i>GRHL1</i>      | -3628.67 | -3644.87 | 1.26E-08 | 3.21E-07 |
| PRU011752 | <i>P4HA2</i>      | -2553.57 | -2569.71 | 1.34E-08 | 3.40E-07 |
| PRU009866 | <i>ITPR2</i>      | -7661    | -7676.84 | 1.82E-08 | 4.61E-07 |
| PRU001489 |                   | -609.419 | -625.182 | 1.97E-08 | 4.96E-07 |
| PRU000784 | <i>C12H3orf18</i> | -1109.85 | -1125.37 | 2.55E-08 | 6.39E-07 |
| PRU008985 | <i>GSTCD</i>      | -3354.27 | -3369.73 | 2.69E-08 | 6.73E-07 |
| PRU012073 | <i>MIER3</i>      | -1005.57 | -1020.74 | 3.60E-08 | 8.95E-07 |
| PRU004093 | <i>PHYH</i>       | -2018.05 | -2032.9  | 5.06E-08 | 1.25E-06 |
| PRU008119 | <i>RMDN1</i>      | -1466.99 | -1481.69 | 5.90E-08 | 1.45E-06 |
| PRU005333 | <i>PVRL1</i>      | -766.25  | -780.897 | 6.22E-08 | 1.53E-06 |
| PRU009317 | <i>OGFOD3</i>     | -1497.08 | -1511.41 | 8.68E-08 | 2.12E-06 |
| PRU013881 | <i>SYT10</i>      | -2656.24 | -2670.55 | 8.74E-08 | 2.13E-06 |
| PRU001065 | <i>ZFAND3</i>     | -727.838 | -742.003 | 1.02E-07 | 2.48E-06 |
| PRU008948 | <i>GPC6</i>       | -1171.59 | -1185.42 | 1.45E-07 | 3.50E-06 |
| PRU000517 | <i>RAD18</i>      | -3071.17 | -3084.9  | 1.60E-07 | 3.86E-06 |
| PRU001399 | <i>SKP1</i>       | -736.359 | -750.077 | 1.62E-07 | 3.89E-06 |
| PRU008642 | <i>DHDDS</i>      | -1135.51 | -1149.18 | 1.70E-07 | 4.06E-06 |
| PRU013422 |                   | -1269.87 | -1283.37 | 2.04E-07 | 4.84E-06 |
| PRU012653 | <i>DYNCH1</i>     | -13581.7 | -13595.1 | 2.18E-07 | 5.18E-06 |
| PRU010288 | <i>ICOS</i>       | -1195.85 | -1209.19 | 2.39E-07 | 5.63E-06 |

|           |                    |          |          |          |          |
|-----------|--------------------|----------|----------|----------|----------|
| PRU009440 | <i>FSD1L</i>       | -2896.58 | -2909.84 | 2.60E-07 | 6.11E-06 |
| PRU002241 | <i>RBP1</i>        | -916.352 | -929.411 | 3.21E-07 | 7.52E-06 |
| PRU012001 | <i>HDAC2</i>       | -1646.94 | -1659.95 | 3.38E-07 | 7.88E-06 |
| PRU001484 | <i>ING2</i>        | -1125.3  | -1137.98 | 4.74E-07 | 1.10E-05 |
| PRU014282 | <i>CAD</i>         | -10099.1 | -10111.6 | 5.64E-07 | 1.31E-05 |
| PRU000398 | <i>FAM178A</i>     | -1223.18 | -1235.63 | 6.01E-07 | 1.39E-05 |
| PRU008845 |                    | -964.081 | -976.482 | 6.35E-07 | 1.46E-05 |
| PRU004005 | <i>CTNNA3</i>      | -2898.5  | -2910.87 | 6.54E-07 | 1.50E-05 |
| PRU014196 | <i>PLAA</i>        | -3492.5  | -3504.72 | 7.64E-07 | 1.74E-05 |
| PRU006925 | <i>RFX4</i>        | -2585.9  | -2598.02 | 8.53E-07 | 1.94E-05 |
| PRU007652 | <i>SLC6A18</i>     | -3172.51 | -3184.4  | 1.08E-06 | 2.45E-05 |
| PRU005219 | <i>ERCC4</i>       | -4386.65 | -4398.49 | 1.13E-06 | 2.55E-05 |
| PRU013673 | <i>CDC73</i>       | -2542.12 | -2553.88 | 1.24E-06 | 2.79E-05 |
| PRU014323 | <i>STAM2</i>       | -1923.34 | -1935.02 | 1.34E-06 | 2.99E-05 |
| PRU006837 | <i>INO80</i>       | -7575.62 | -7587.27 | 1.39E-06 | 3.10E-05 |
| PRU013635 | <i>C8H1orf27</i>   | -2549.07 | -2560.51 | 1.73E-06 | 3.83E-05 |
| PRU007930 | <i>AEBP1</i>       | -1881.01 | -1892.43 | 1.77E-06 | 3.92E-05 |
| PRU005400 | <i>EXOSC1</i>      | -1062.55 | -1073.89 | 1.92E-06 | 4.23E-05 |
| PRU006315 | <i>DACH2</i>       | -1936.02 | -1947.35 | 1.93E-06 | 4.24E-05 |
| PRU008398 | <i>ZPR1</i>        | -2659.58 | -2670.9  | 1.94E-06 | 4.25E-05 |
| PRU012856 | <i>PSMB7</i>       | -1016.17 | -1027.42 | 2.08E-06 | 4.54E-05 |
| PRU012964 | <i>ZFHX4</i>       | -16409.6 | -16420.8 | 2.21E-06 | 4.80E-05 |
| PRU011404 |                    | -1299.33 | -1310.49 | 2.32E-06 | 5.01E-05 |
| PRU011705 | <i>PRTFDC1</i>     | -865.416 | -876.543 | 2.39E-06 | 5.15E-05 |
| PRU012892 | <i>IFNG</i>        | -1340.39 | -1351.44 | 2.60E-06 | 5.58E-05 |
| PRU008465 |                    | -1005.25 | -1016.2  | 2.89E-06 | 6.19E-05 |
| PRU007353 | <i>ACBD3</i>       | -2101.16 | -2111.92 | 3.48E-06 | 7.41E-05 |
| PRU005496 | <i>C24H11orf53</i> | -1767.59 | -1778.19 | 4.10E-06 | 8.72E-05 |
| PRU009736 | <i>SRF</i>         | -1191.44 | -1201.95 | 4.55E-06 | 9.64E-05 |
| PRU011611 |                    | -12013.9 | -12024.3 | 4.79E-06 | 0.000101 |
| PRU008092 | <i>ARFGEF1</i>     | -4690.12 | -4700.49 | 5.26E-06 | 0.00011  |
| PRU014426 | <i>SLC2A3</i>      | -2690.77 | -2701.14 | 5.27E-06 | 0.00011  |
| PRU013492 | <i>MCPH1</i>       | -854.218 | -864.424 | 6.25E-06 | 0.00013  |
| PRU004272 | <i>HDAC7</i>       | -2700.55 | -2710.62 | 7.20E-06 | 0.00015  |
| PRU001347 | <i>CCDC50</i>      | -1018.82 | -1028.84 | 7.62E-06 | 0.000158 |
| PRU012469 | <i>RASGEF1A</i>    | -2224.91 | -2234.9  | 7.80E-06 | 0.000161 |
| PRU012221 | <i>METTL13</i>     | -3262.99 | -3272.95 | 8.04E-06 | 0.000166 |
| PRU002599 | <i>CEP192</i>      | -6586.51 | -6596.3  | 9.67E-06 | 0.000198 |
| PRU011289 | <i>UGDH</i>        | -2879.06 | -2888.81 | 1.00E-05 | 0.000205 |
| PRU013486 | <i>CD109</i>       | -6093.88 | -6103.58 | 1.06E-05 | 0.000216 |
| PRU012665 | <i>ZFYVE21</i>     | -1021.63 | -1031.31 | 1.08E-05 | 0.00022  |
| PRU007865 | <i>CDON</i>        | -2717.98 | -2727.63 | 1.11E-05 | 0.000225 |
| PRU006660 | <i>TAF2</i>        | -4228.88 | -4238.51 | 1.14E-05 | 0.00023  |
| PRU000336 | <i>POLE</i>        | -11032.1 | -11041.7 | 1.23E-05 | 0.000247 |
| PRU001210 | <i>ANAPC2</i>      | -3913.2  | -3922.69 | 1.32E-05 | 0.000265 |
| PRU003362 | <i>NRCAM</i>       | -5430.43 | -5439.9  | 1.34E-05 | 0.000268 |
| PRU002154 | <i>XPO1</i>        | -5319.55 | -5328.7  | 1.88E-05 | 0.000375 |
| PRU003137 | <i>KIF21A</i>      | -7226.7  | -7235.66 | 2.28E-05 | 0.000453 |

|           |                 |          |          |          |          |
|-----------|-----------------|----------|----------|----------|----------|
| PRU005681 | <i>CLPX</i>     | -3009.06 | -3018    | 2.33E-05 | 0.000461 |
| PRU001770 | <i>SLC2A12</i>  | -2924.22 | -2933.02 | 2.73E-05 | 0.000538 |
| PRU000590 | <i>GNL3</i>     | -2966.93 | -2975.67 | 2.89E-05 | 0.000568 |
| PRU000519 | <i>SUMF1</i>    | -1376.08 | -1384.68 | 3.34E-05 | 0.000654 |
| PRU013821 | <i>DCAF6</i>    | -3909.9  | -3918.48 | 3.46E-05 | 0.000676 |
| PRU003158 | <i>TBC1D22A</i> | -2513.89 | -2522.44 | 3.53E-05 | 0.000687 |
| PRU008357 | <i>PKP3</i>     | -2380.5  | -2389.02 | 3.67E-05 | 0.000713 |
| PRU006705 | <i>PIK3R1</i>   | -3885.05 | -3893.55 | 3.71E-05 | 0.000716 |
| PRU013268 | <i>TPD52L2</i>  | -1491.73 | -1500.15 | 4.05E-05 | 0.000781 |
| PRU009066 | <i>RBPMS</i>    | -1227.64 | -1236.01 | 4.31E-05 | 0.000827 |
| PRU009624 | <i>DHX30</i>    | -2285.82 | -2294.08 | 4.84E-05 | 0.000926 |
| PRU011569 | <i>ZPLD1</i>    | -2537.87 | -2546.04 | 5.32E-05 | 0.001015 |
| PRU000300 | <i>DHX37</i>    | -6860.62 | -6868.69 | 5.87E-05 | 0.001116 |
| PRU001741 | <i>PEX16</i>    | -553.911 | -561.543 | 9.35E-05 | 0.001768 |
| PRU008610 | <i>ICOSLG</i>   | -2045.4  | -2053.03 | 9.33E-05 | 0.001768 |
| PRU011962 | <i>VPS37A</i>   | -1732.16 | -1739.73 | 9.99E-05 | 0.001883 |
| PRU005289 | <i>HBAD</i>     | -833.744 | -841.282 | 0.000103 | 0.001941 |
| PRU007754 | <i>SUPT3H</i>   | -1756.37 | -1763.82 | 0.000113 | 0.002122 |
| PRU001361 | <i>LEKRI</i>    | -1632.93 | -1640.12 | 0.000149 | 0.002789 |
| PRU007085 | <i>ATXN3</i>    | -1687.46 | -1694.55 | 0.000167 | 0.003115 |
| PRU007664 | <i>BEGAIN</i>   | -2893.67 | -2900.63 | 0.000191 | 0.003552 |
| PRU004002 | <i>PBLD</i>     | -1889.86 | -1896.79 | 0.000197 | 0.003639 |
| PRU003333 | <i>FAM105A</i>  | -1391.17 | -1397.98 | 0.000225 | 0.004142 |
| PRU009644 | <i>ANKFY1</i>   | -5878.18 | -5884.9  | 0.000245 | 0.004512 |
| PRU010954 | <i>TAX1BP1</i>  | -4175.55 | -4182.22 | 0.00026  | 0.004769 |
| PRU006561 | <i>TAGAP</i>    | -3117.78 | -3124.39 | 0.000276 | 0.005043 |
| PRU005575 | <i>CERKL</i>    | -1774.66 | -1781.1  | 0.000334 | 0.006078 |
| PRU011755 | <i>SEC24A</i>   | -5144.74 | -5151.11 | 0.00036  | 0.006545 |
| PRU012043 | <i>PEF1</i>     | -1004.38 | -1010.65 | 0.000401 | 0.007253 |
| PRU002974 | <i>DHRX</i>     | -1601.99 | -1608.13 | 0.00046  | 0.008305 |
| PRU003777 | <i>PPP6R2</i>   | -3432.63 | -3438.69 | 0.000502 | 0.009037 |
| PRU000441 | <i>FAM21C</i>   | -4885.02 | -4891.06 | 0.000514 | 0.009219 |
| PRU006613 | <i>FABP7</i>    | -649.183 | -655.055 | 0.00061  | 0.010912 |
| PRU006133 | <i>ORC6</i>     | -1298.54 | -1304.37 | 0.000641 | 0.011434 |
| PRU013924 | <i>FYB</i>      | -617.954 | -623.701 | 0.000698 | 0.012416 |
| PRU008943 | <i>NAALAD2</i>  | -4238.74 | -4244.19 | 0.000956 | 0.016951 |
| PRU009087 | <i>CDC123</i>   | -1592.47 | -1597.92 | 0.00096  | 0.016964 |
| PRU009225 | <i>MYO1B</i>    | -4820.48 | -4825.89 | 0.000995 | 0.017535 |
| PRU013872 |                 | -1414.53 | -1419.94 | 0.001009 | 0.017739 |
| PRU001182 | <i>FAM114A1</i> | -3035.45 | -3040.85 | 0.00102  | 0.017879 |
| PRU009102 | <i>SLC44A1</i>  | -2308.02 | -2313.39 | 0.001046 | 0.018268 |
| PRU005679 | <i>RAB11A</i>   | -378.853 | -384.212 | 0.001061 | 0.018492 |
| PRU009512 | <i>BRX1</i>     | -1615.56 | -1620.91 | 0.001081 | 0.018772 |
| PRU005634 | <i>MGAT5</i>    | -3489.23 | -3494.49 | 0.00118  | 0.020431 |
| PRU011498 | <i>BOC</i>      | -2326.35 | -2331.54 | 0.001274 | 0.021996 |
| PRU012905 | <i>LIN7A</i>    | -1209.2  | -1214.36 | 0.001319 | 0.022712 |
| PRU010861 | <i>CDK14</i>    | -775.713 | -780.715 | 0.001561 | 0.026802 |
| PRU010343 | <i>PGAP1</i>    | -4895.63 | -4900.56 | 0.00168  | 0.028766 |

|                      |                |          |          |          |          |
|----------------------|----------------|----------|----------|----------|----------|
| PRU007123            |                | -2157.5  | -2162.42 | 0.001703 | 0.029076 |
| PRU008083            | <i>FABP4</i>   | -1021.6  | -1026.48 | 0.001791 | 0.030501 |
| PRU011257            | <i>NELFA</i>   | -1941.07 | -1945.68 | 0.002395 | 0.040667 |
| PRU003168            | <i>HGF</i>     | -3231.56 | -3236.05 | 0.002716 | 0.045974 |
| PRU005742            | <i>GTF2A2</i>  | -597.772 | -602.232 | 0.002822 | 0.047642 |
| <b><i>Taczan</i></b> |                |          |          |          |          |
| OTA005370            | <i>RYR3</i>    | -19106.8 | -19254   | 5.61E-66 | 3.36E-62 |
| OTA013539            | <i>ASH1L</i>   | -17114.9 | -17252.6 | 7.52E-62 | 2.25E-58 |
| OTA005581            | <i>RPAP1</i>   | -7805.98 | -7936.33 | 1.21E-58 | 2.42E-55 |
| OTA008817            | <i>TBC1D30</i> | -3999.44 | -4126.74 | 2.59E-57 | 3.88E-54 |
| OTA014701            | <i>ZFYVE16</i> | -4269.06 | -4394.02 | 2.69E-56 | 3.23E-53 |
| OTA011062            | <i>MYH11</i>   | -9843.07 | -9963.33 | 3.03E-54 | 2.59E-51 |
| OTA003674            | <i>SPATA13</i> | -3591.88 | -3712.17 | 2.95E-54 | 2.59E-51 |
| OTA010855            | <i>ACADSB</i>  | -2772.7  | -2892.36 | 5.54E-54 | 4.15E-51 |
| OTA001050            | <i>ELMO2</i>   | -3877.31 | -3987.16 | 1.05E-49 | 7.02E-47 |
| OTA008058            |                | -3977    | -4077.74 | 9.95E-46 | 5.96E-43 |
| OTA006342            | <i>AGL</i>     | -8284.05 | -8383.98 | 2.24E-45 | 1.22E-42 |
| OTA014267            | <i>DST</i>     | -20684   | -20778.3 | 6.52E-43 | 3.26E-40 |
| OTA013757            | <i>ELF1</i>    | -2956.26 | -3043.18 | 1.07E-39 | 4.91E-37 |
| OTA006672            | <i>CCDC93</i>  | -3321.11 | -3407.85 | 1.29E-39 | 5.51E-37 |
| OTA009332            | <i>PYGL</i>    | -3484.05 | -3570.67 | 1.46E-39 | 5.85E-37 |
| OTA005448            | <i>TRIP11</i>  | -10466.6 | -10551.6 | 7.30E-39 | 2.74E-36 |
| OTA001158            | <i>PDK4</i>    | -2154.26 | -2238.59 | 1.45E-38 | 5.10E-36 |
| OTA005813            | <i>AFAP1</i>   | -4614.18 | -4698.45 | 1.54E-38 | 5.12E-36 |
| OTA011736            | <i>UBE2J2</i>  | -1797.32 | -1880.59 | 4.24E-38 | 1.34E-35 |
| OTA006615            | <i>DFNB31</i>  | -4223.23 | -4306.02 | 6.86E-38 | 2.06E-35 |
| OTA009067            | <i>RNGTT</i>   | -2615.86 | -2697.55 | 2.07E-37 | 5.91E-35 |
| OTA006340            | <i>JAK1</i>    | -6289.86 | -6371.3  | 2.65E-37 | 7.23E-35 |
| OTA002844            |                | -3857.94 | -3938.79 | 4.81E-37 | 1.25E-34 |
| OTA001655            | <i>MCCC1</i>   | -3605.04 | -3684.63 | 1.72E-36 | 4.29E-34 |
| OTA012297            | <i>PIK3C2G</i> | -6805.52 | -6884.26 | 3.99E-36 | 9.57E-34 |
| OTA007192            | <i>TANC2</i>   | -6599.52 | -6676.74 | 1.86E-35 | 4.30E-33 |
| OTA009904            | <i>IFNAR1</i>  | -3292.33 | -3367.13 | 2.12E-34 | 4.70E-32 |
| OTA008725            | <i>CELSR1</i>  | -14603.5 | -14678.2 | 2.35E-34 | 5.02E-32 |
| OTA006899            | <i>SPATS2L</i> | -2907.74 | -2982.27 | 2.79E-34 | 5.76E-32 |
| OTA011559            | <i>NIPAL4</i>  | -2187.16 | -2261.48 | 3.44E-34 | 6.86E-32 |
| OTA000308            | <i>TBC1D9B</i> | -5567.15 | -5636.79 | 3.83E-32 | 7.40E-30 |
| OTA008987            | <i>PKHD1</i>   | -8755.86 | -8825.4  | 4.21E-32 | 7.88E-30 |
| OTA005562            | <i>SYT13</i>   | -2376.1  | -2445.51 | 4.82E-32 | 8.75E-30 |
| OTA012165            | <i>GIT2</i>    | -3517.37 | -3586.15 | 9.02E-32 | 1.59E-29 |
| OTA009196            |                | -2291.95 | -2360.53 | 1.11E-31 | 1.89E-29 |
| OTA005869            | <i>EVC2</i>    | -7233.72 | -7301.62 | 2.19E-31 | 3.65E-29 |
| OTA002059            | <i>ARID1B</i>  | -7398.21 | -7464.97 | 6.95E-31 | 1.13E-28 |
| OTA010963            | <i>SYT17</i>   | -2604.55 | -2671.27 | 7.28E-31 | 1.15E-28 |
| OTA011470            | <i>CHL1</i>    | -7017.71 | -7084.34 | 7.88E-31 | 1.21E-28 |
| OTA002101            | <i>TAGAP</i>   | -3057.55 | -3123.66 | 1.35E-30 | 2.02E-28 |
| OTA009588            | <i>ABCC9</i>   | -8338.44 | -8404.11 | 2.08E-30 | 3.05E-28 |
| OTA002511            | <i>RFX4</i>    | -2525.97 | -2591.1  | 3.59E-30 | 5.12E-28 |

|           |                   |          |          |          |          |
|-----------|-------------------|----------|----------|----------|----------|
| OTA007365 | <i>UBA6</i>       | -4766.98 | -4831.32 | 7.93E-30 | 1.11E-27 |
| OTA009482 | <i>C5H11orf24</i> | -1728.59 | -1792.87 | 8.47E-30 | 1.15E-27 |
| OTA013485 | <i>RLIM</i>       | -3191.62 | -3255.87 | 8.78E-30 | 1.17E-27 |
| OTA002487 | <i>SGSM3</i>      | -3834.42 | -3898.16 | 1.46E-29 | 1.90E-27 |
| OTA007213 | <i>KLHL11</i>     | -2770.22 | -2832.15 | 8.98E-29 | 1.15E-26 |
| OTA005586 | <i>EIF2AK4</i>    | -8352.31 | -8414.04 | 1.10E-28 | 1.37E-26 |
| OTA009838 | <i>DDX58</i>      | -4047.65 | -4109.03 | 1.57E-28 | 1.92E-26 |
| OTA011848 | <i>CCDC40</i>     | -4767.81 | -4829.01 | 1.88E-28 | 2.25E-26 |
| OTA008965 | <i>SF3A2</i>      | -1882.23 | -1943.24 | 2.28E-28 | 2.67E-26 |
| OTA001243 | <i>SMARCC1</i>    | -5216.77 | -5277.33 | 3.58E-28 | 4.12E-26 |
| OTA009686 |                   | -4971.54 | -5031.28 | 8.27E-28 | 9.36E-26 |
| OTA009734 | <i>CDH6</i>       | -3878.55 | -3938.25 | 8.57E-28 | 9.51E-26 |
| OTA009767 | <i>BRD9</i>       | -2970.34 | -3029.51 | 1.46E-27 | 1.59E-25 |
| OTA001152 | <i>MTPAP</i>      | -2466.32 | -2525.42 | 1.57E-27 | 1.68E-25 |
| OTA008982 | <i>BLK</i>        | -2332.82 | -2391.73 | 1.90E-27 | 1.96E-25 |
| OTA001185 | <i>GAD2</i>       | -2437.23 | -2496.15 | 1.89E-27 | 1.96E-25 |
| OTA004676 | <i>PHF2</i>       | -5606.18 | -5665.03 | 2.01E-27 | 2.04E-25 |
| OTA005913 | <i>PPP2R2C</i>    | -2060.4  | -2118.59 | 3.92E-27 | 3.92E-25 |
| OTA010740 | <i>MFGE8</i>      | -1801.5  | -1859.35 | 5.52E-27 | 5.42E-25 |
| OTA007291 | <i>EIF3I</i>      | -1879.19 | -1936.97 | 5.93E-27 | 5.73E-25 |
| OTA001637 | <i>ANKRD44</i>    | -4800.27 | -4857.03 | 1.66E-26 | 1.58E-24 |
| OTA007711 | <i>PAPSS2</i>     | -3617.37 | -3673.99 | 1.91E-26 | 1.78E-24 |
| OTA007975 |                   | -4500.59 | -4555.51 | 1.06E-25 | 9.74E-24 |
| OTA007650 | <i>PHACTR2</i>    | -2461.3  | -2516.03 | 1.29E-25 | 1.17E-23 |
| OTA003518 | <i>MYO10</i>      | -8931.07 | -8985.48 | 1.77E-25 | 1.58E-23 |
| OTA009180 | <i>TTL</i>        | -1834.11 | -1888.27 | 2.28E-25 | 2.01E-23 |
| OTA001843 | <i>SAMD11</i>     | -2046.02 | -2100.11 | 2.45E-25 | 2.13E-23 |
| OTA009642 | <i>RAI14</i>      | -3949.04 | -4002.36 | 5.33E-25 | 4.57E-23 |
| OTA015067 | <i>DNAJC25</i>    | -1427.64 | -1478.32 | 7.66E-24 | 6.47E-22 |
| OTA006362 | <i>IPO13</i>      | -4448.29 | -4498.82 | 8.90E-24 | 7.41E-22 |
| OTA008499 | <i>NRIP3</i>      | -1559.4  | -1609.43 | 1.48E-23 | 1.22E-21 |
| OTA010021 | <i>PLCB2</i>      | -4150.7  | -4200.66 | 1.59E-23 | 1.28E-21 |
| OTA005593 | <i>FAM20C</i>     | -1570.53 | -1619.78 | 3.25E-23 | 2.59E-21 |
| OTA002221 | <i>CSDE1</i>      | -3409.01 | -3457.56 | 6.57E-23 | 5.18E-21 |
| OTA006363 | <i>PIGK</i>       | -2130.36 | -2178.78 | 7.52E-23 | 5.85E-21 |
| OTA014009 | <i>RIPK1</i>      | -4701.3  | -4749.65 | 7.99E-23 | 6.14E-21 |
| OTA003052 | <i>NECAP1</i>     | -1397.89 | -1446.09 | 9.36E-23 | 7.10E-21 |
| OTA007847 | <i>CMTR1</i>      | -1990.22 | -2038.37 | 9.95E-23 | 7.46E-21 |
| OTA007185 | <i>CDC27</i>      | -4113.23 | -4161.1  | 1.32E-22 | 9.77E-21 |
| OTA008048 | <i>PRRC2C</i>     | -13410.9 | -13458.6 | 1.55E-22 | 1.13E-20 |
| OTA001605 | <i>EEF1B2</i>     | -1350.31 | -1397.63 | 2.27E-22 | 1.64E-20 |
| OTA002365 | <i>POLE</i>       | -10989.6 | -11036.4 | 3.79E-22 | 2.71E-20 |
| OTA006486 | <i>AKRIA1</i>     | -1704.6  | -1751.4  | 3.87E-22 | 2.73E-20 |
| OTA005916 | <i>FGFR3</i>      | -3931.69 | -3978.45 | 4.02E-22 | 2.80E-20 |
| OTA013182 | <i>HNRNPD</i>     | -1407    | -1452.3  | 1.76E-21 | 1.21E-19 |
| OTA014153 | <i>RIMS1</i>      | -3642.78 | -3688.04 | 1.83E-21 | 1.24E-19 |
| OTA002986 | <i>ABHD5</i>      | -1696.05 | -1741.09 | 2.28E-21 | 1.54E-19 |
| OTA014738 |                   | -1716.08 | -1760.86 | 2.97E-21 | 1.98E-19 |

|           |                 |          |          |          |          |
|-----------|-----------------|----------|----------|----------|----------|
| OTA011646 | <i>PDLIM7</i>   | -2175.67 | -2220.19 | 3.88E-21 | 2.56E-19 |
| OTA009201 | <i>ARAPI1</i>   | -5440.26 | -5484.31 | 6.22E-21 | 4.05E-19 |
| OTA007341 | <i>MYOM3</i>    | -8378.18 | -8421.78 | 9.77E-21 | 6.29E-19 |
| OTA008729 | <i>BRD1</i>     | -6282.1  | -6325.57 | 1.12E-20 | 7.13E-19 |
| OTA014832 |                 | -1763.27 | -1806.47 | 1.47E-20 | 9.29E-19 |
| OTA008809 | <i>DDX49</i>    | -1462.99 | -1506.01 | 1.76E-20 | 1.10E-18 |
| OTA003636 | <i>NAV3</i>     | -12187.8 | -12230.8 | 1.84E-20 | 1.14E-18 |
| OTA003924 | <i>PAN3</i>     | -3645.47 | -3688.29 | 2.16E-20 | 1.32E-18 |
| OTA006058 | <i>RAB7A</i>    | -1216.03 | -1258.65 | 2.63E-20 | 1.59E-18 |
| OTA006364 |                 | -8491.71 | -8534.29 | 2.74E-20 | 1.64E-18 |
| OTA012694 | <i>HGD</i>      | -2381.26 | -2423.32 | 4.64E-20 | 2.75E-18 |
| OTA013901 |                 | -1133.11 | -1175.08 | 5.12E-20 | 3.01E-18 |
| OTA006669 |                 | -2308.94 | -2350.75 | 6.02E-20 | 3.50E-18 |
| OTA010188 | <i>GATAD2A</i>  | -4302.2  | -4343.88 | 6.84E-20 | 3.94E-18 |
| OTA006849 | <i>GLS</i>      | -2172.58 | -2214.19 | 7.36E-20 | 4.20E-18 |
| OTA001631 | <i>HECW2</i>    | -9080.34 | -9121.73 | 9.19E-20 | 5.19E-18 |
| OTA014859 |                 | -1506.47 | -1547.8  | 9.67E-20 | 5.42E-18 |
| OTA003431 | <i>TBC1D20</i>  | -2187.2  | -2228.26 | 1.28E-19 | 7.10E-18 |
| OTA002513 | <i>TNRC6B</i>   | -5734.34 | -5775.21 | 1.56E-19 | 8.57E-18 |
| OTA004163 | <i>HK1</i>      | -5297.58 | -5337.95 | 2.56E-19 | 1.40E-17 |
| OTA006354 |                 | -3664.67 | -3704.9  | 2.97E-19 | 1.60E-17 |
| OTA011766 | <i>CEP104</i>   | -5579.14 | -5619.15 | 3.70E-19 | 1.98E-17 |
| OTA012213 | <i>TBX1</i>     | -946.721 | -986.142 | 6.73E-19 | 3.57E-17 |
| OTA008161 |                 | -1691.73 | -1731.09 | 7.15E-19 | 3.76E-17 |
| OTA011754 | <i>PIK3CD</i>   | -5460.86 | -5499.6  | 1.34E-18 | 6.97E-17 |
| OTA002452 | <i>USP54</i>    | -5680.19 | -5718.79 | 1.56E-18 | 8.06E-17 |
| OTA000941 | <i>MMADHC</i>   | -2050.87 | -2089.22 | 1.98E-18 | 1.01E-16 |
| OTA004521 |                 | -3025.18 | -3063.44 | 2.16E-18 | 1.10E-16 |
| OTA014444 | <i>SSRP1</i>    | -3909.69 | -3947.44 | 3.65E-18 | 1.84E-16 |
| OTA014706 | <i>TRPM3</i>    | -7668.52 | -7706.22 | 3.83E-18 | 1.91E-16 |
| OTA003585 | <i>SERTAD4</i>  | -1531.13 | -1568.81 | 3.94E-18 | 1.95E-16 |
| OTA012654 | <i>STYXL1</i>   | -2125.47 | -2162.71 | 6.10E-18 | 2.99E-16 |
| OTA008522 | <i>OTOG</i>     | -8415.77 | -8452.93 | 6.67E-18 | 3.25E-16 |
| OTA008929 | <i>LRRFIP1</i>  | -2147.55 | -2184.52 | 8.09E-18 | 3.91E-16 |
| OTA015205 | <i>KMO</i>      | -2392.11 | -2428.87 | 9.92E-18 | 4.76E-16 |
| OTA004618 | <i>DISP2</i>    | -6841.55 | -6878.06 | 1.28E-17 | 6.10E-16 |
| OTA003082 | <i>NOX4</i>     | -2921.4  | -2957.89 | 1.31E-17 | 6.20E-16 |
| OTA013635 | <i>MAGI3</i>    | -4695.03 | -4731.06 | 2.09E-17 | 9.81E-16 |
| OTA008966 | <i>ANKRD66</i>  | -930.465 | -966.091 | 3.15E-17 | 1.46E-15 |
| OTA007166 | <i>CLDN16</i>   | -1160.1  | -1195.23 | 5.19E-17 | 2.39E-15 |
| OTA003598 | <i>PLB1</i>     | -4114.56 | -4149.67 | 5.31E-17 | 2.43E-15 |
| OTA009133 | <i>BBX</i>      | -4670.17 | -4705.15 | 6.07E-17 | 2.76E-15 |
| OTA011460 | <i>CACNA2D3</i> | -2001.28 | -2035.91 | 8.68E-17 | 3.91E-15 |
| OTA015269 | <i>SLC30A10</i> | -2651.72 | -2686.32 | 8.88E-17 | 3.97E-15 |
| OTA000667 | <i>RALGPS1</i>  | -3258.43 | -3292.79 | 1.13E-16 | 5.03E-15 |
| OTA003668 | <i>FLT1</i>     | -3172.28 | -3206.4  | 1.45E-16 | 6.38E-15 |
| OTA009319 | <i>POLE2</i>    | -2408.65 | -2442.66 | 1.62E-16 | 7.07E-15 |
| OTA003327 | <i>CCDC86</i>   | -710.134 | -744.068 | 1.75E-16 | 7.59E-15 |

|           |                   |          |          |          |          |
|-----------|-------------------|----------|----------|----------|----------|
| OTA001523 | <i>CSTF2</i>      | -3141.11 | -3174.65 | 2.62E-16 | 1.13E-14 |
| OTA009614 | <i>TMEM52B</i>    | -918.498 | -951.865 | 3.11E-16 | 1.33E-14 |
| OTA006050 | <i>BAP1</i>       | -3566.89 | -3599.83 | 4.79E-16 | 2.04E-14 |
| OTA009758 | <i>PHF14</i>      | -2913.07 | -2945.79 | 6.02E-16 | 2.54E-14 |
| OTA000956 | <i>MARCO</i>      | -3520.7  | -3553.4  | 6.13E-16 | 2.57E-14 |
| OTA012755 |                   | -3820.55 | -3853.09 | 7.18E-16 | 2.99E-14 |
| OTA010037 | <i>DCP2</i>       | -1407.84 | -1440.2  | 8.64E-16 | 3.57E-14 |
| OTA010909 | <i>ZRANB1</i>     | -3720.54 | -3752.19 | 1.77E-15 | 7.28E-14 |
| OTA000637 | <i>C17H9orf96</i> | -1597.4  | -1629    | 1.86E-15 | 7.58E-14 |
| OTA012583 | <i>SUN2</i>       | -3779.81 | -3811.06 | 2.68E-15 | 1.08E-13 |
| OTA006949 | <i>CDK15</i>      | -2226.85 | -2257.98 | 2.99E-15 | 1.20E-13 |
| OTA009096 | <i>ASCC3</i>      | -10099.6 | -10130.6 | 3.52E-15 | 1.41E-13 |
| OTA014756 | <i>CRLF2</i>      | -1133.45 | -1164.4  | 3.60E-15 | 1.43E-13 |
| OTA007801 | <i>SRD5A2</i>     | -855.703 | -886.552 | 4.01E-15 | 1.58E-13 |
| OTA007261 | <i>ETV4</i>       | -2295.42 | -2326.24 | 4.12E-15 | 1.61E-13 |
| OTA000640 | <i>COL5A1</i>     | -4360.25 | -4391.03 | 4.32E-15 | 1.68E-13 |
| OTA008334 |                   | -5111.3  | -5142.04 | 4.51E-15 | 1.74E-13 |
| OTA014232 | <i>TRMT1L</i>     | -2785.7  | -2816.2  | 5.70E-15 | 2.19E-13 |
| OTA002128 | <i>GINM1</i>      | -1443.07 | -1473.42 | 6.63E-15 | 2.53E-13 |
| OTA013662 | <i>USP49</i>      | -3810.14 | -3840.27 | 8.31E-15 | 3.15E-13 |
| OTA006415 | <i>EXTL2</i>      | -871.807 | -901.819 | 9.37E-15 | 3.53E-13 |
| OTA013080 | <i>SIM2</i>       | -2471.57 | -2501.41 | 1.11E-14 | 4.17E-13 |
| OTA004344 | <i>MTFR2</i>      | -1113.46 | -1143.08 | 1.39E-14 | 5.17E-13 |
| OTA008584 |                   | -2008.32 | -2037.36 | 2.51E-14 | 9.28E-13 |
| OTA015013 | <i>SLC4A5</i>     | -5034.67 | -5063.34 | 3.68E-14 | 1.35E-12 |
| OTA007821 | <i>AGPAT4</i>     | -1888.85 | -1917.44 | 3.99E-14 | 1.46E-12 |
| OTA000396 | <i>TNIP1</i>      | -2951.33 | -2979.86 | 4.21E-14 | 1.53E-12 |
| OTA009778 | <i>CTDP1</i>      | -4342.48 | -4370.75 | 5.54E-14 | 2.00E-12 |
| OTA002749 | <i>TM4SF19</i>    | -1360.4  | -1388.57 | 6.15E-14 | 2.21E-12 |
| OTA002305 | <i>LZTR1</i>      | -3968.73 | -3996.4  | 1.01E-13 | 3.60E-12 |
| OTA006536 | <i>CCBL1</i>      | -2273.24 | -2300.83 | 1.10E-13 | 3.89E-12 |
| OTA006268 | <i>HYI</i>        | -964.292 | -991.722 | 1.29E-13 | 4.56E-12 |
| OTA006432 | <i>ANGPTL3</i>    | -2749.31 | -2776.69 | 1.36E-13 | 4.77E-12 |
| OTA009224 | <i>NR2E1</i>      | -668.202 | -695.368 | 1.69E-13 | 5.90E-12 |
| OTA002849 | <i>NME8</i>       | -3208.44 | -3235.23 | 2.49E-13 | 8.63E-12 |
| OTA000091 | <i>TLL5</i>       | -6329.03 | -6355.74 | 2.68E-13 | 9.22E-12 |
| OTA002483 | <i>ZC3H7B</i>     | -4882.52 | -4909.23 | 2.69E-13 | 9.22E-12 |
| OTA007383 | <i>ETFDH</i>      | -2736.47 | -2763.14 | 2.82E-13 | 9.62E-12 |
| OTA010731 | <i>IQCH</i>       | -3622.69 | -3649.34 | 2.86E-13 | 9.70E-12 |
| OTA004219 | <i>CHRNA3</i>     | -1875.3  | -1901.75 | 3.51E-13 | 1.18E-11 |
| OTA014843 | <i>IARS</i>       | -6946.43 | -6972.85 | 3.65E-13 | 1.22E-11 |
| OTA003824 | <i>MRPL48</i>     | -1126.81 | -1152.96 | 4.76E-13 | 1.58E-11 |
| OTA011583 | <i>PCBD2</i>      | -640.832 | -666.925 | 5.05E-13 | 1.67E-11 |
| OTA009613 |                   | -3407.22 | -3433.03 | 6.68E-13 | 2.20E-11 |
| OTA013127 | <i>PISD</i>       | -1644.46 | -1670.22 | 7.08E-13 | 2.32E-11 |
| OTA014029 | <i>TAF2</i>       | -4213.72 | -4238.96 | 1.21E-12 | 3.94E-11 |
| OTA009479 | <i>C5H11orf74</i> | -1147.29 | -1172.23 | 1.62E-12 | 5.23E-11 |
| OTA002934 | <i>CPNE4</i>      | -1687.12 | -1712.07 | 1.62E-12 | 5.23E-11 |

|           |                 |          |          |          |          |
|-----------|-----------------|----------|----------|----------|----------|
| OTA014731 | <i>MAMDC2</i>   | -3206.88 | -3231.76 | 1.74E-12 | 5.57E-11 |
| OTA008261 | <i>IWS1</i>     | -3424.29 | -3449.16 | 1.77E-12 | 5.64E-11 |
| OTA001804 | <i>PRKCZ</i>    | -2353.91 | -2378.54 | 2.24E-12 | 7.11E-11 |
| OTA004682 | <i>E2F2</i>     | -1234.92 | -1259.45 | 2.48E-12 | 7.82E-11 |
| OTA001938 | <i>AZIN2</i>    | -3211.2  | -3235.08 | 4.80E-12 | 1.51E-10 |
| OTA001140 | <i>SLC38A8</i>  | -2200.35 | -2223.76 | 7.77E-12 | 2.43E-10 |
| OTA008166 | <i>PABPC1L</i>  | -3829.23 | -3852.5  | 9.02E-12 | 2.80E-10 |
| OTA011953 | <i>NBN</i>      | -3044.18 | -3067.4  | 9.42E-12 | 2.91E-10 |
| OTA009817 | <i>HORMAD1</i>  | -788.204 | -811.225 | 1.16E-11 | 3.56E-10 |
| OTA007780 | <i>MCM8</i>     | -4433.94 | -4456.48 | 1.90E-11 | 5.80E-10 |
| OTA004104 | <i>MATR3</i>    | -4326.54 | -4348.71 | 2.75E-11 | 8.36E-10 |
| OTA000507 | <i>AKAP13</i>   | -6997.4  | -7019.37 | 3.40E-11 | 1.02E-09 |
| OTA007108 |                 | -2597.81 | -2619.78 | 3.39E-11 | 1.02E-09 |
| OTA002978 | <i>AOAH</i>     | -3505.68 | -3527.53 | 3.85E-11 | 1.15E-09 |
| OTA015383 | <i>SUGP1</i>    | -1841.63 | -1863.44 | 3.95E-11 | 1.18E-09 |
| OTA013689 | <i>SYNRG</i>    | -6911.17 | -6932.96 | 4.06E-11 | 1.21E-09 |
| OTA009092 | <i>SEC63</i>    | -2455.91 | -2477.68 | 4.14E-11 | 1.22E-09 |
| OTA006888 | <i>CARF</i>     | -3853.62 | -3875.38 | 4.20E-11 | 1.23E-09 |
| OTA001047 |                 | -1979.02 | -2000.69 | 4.64E-11 | 1.36E-09 |
| OTA008265 | <i>PLSCRI</i>   | -1320.46 | -1342.01 | 5.17E-11 | 1.50E-09 |
| OTA008705 |                 | -1866.1  | -1887.58 | 5.54E-11 | 1.60E-09 |
| OTA001863 | <i>NUDC</i>     | -1697.06 | -1718.26 | 7.42E-11 | 2.14E-09 |
| OTA004961 | <i>ERGIC3</i>   | -1730.74 | -1751.89 | 7.78E-11 | 2.23E-09 |
| OTA014504 | <i>HEXDC</i>    | -2965.16 | -2986.06 | 1.01E-10 | 2.88E-09 |
| OTA011248 | <i>TEC</i>      | -3519.78 | -3540.64 | 1.05E-10 | 2.98E-09 |
| OTA003044 | <i>TENM4</i>    | -8732.83 | -8753.67 | 1.08E-10 | 3.05E-09 |
| OTA014651 | <i>NVL</i>      | -2757.35 | -2777.98 | 1.32E-10 | 3.72E-09 |
| OTA006505 | <i>C8G</i>      | -1010.71 | -1031.21 | 1.52E-10 | 4.25E-09 |
| OTA007382 | <i>GRIA2</i>    | -3787.44 | -3807.92 | 1.55E-10 | 4.32E-09 |
| OTA006111 | <i>LUC7L3</i>   | -2151.96 | -2172.31 | 1.77E-10 | 4.92E-09 |
| OTA001319 | <i>AB11</i>     | -2348.08 | -2368.39 | 1.84E-10 | 5.08E-09 |
| OTA008227 | <i>PLCG1</i>    | -6165.24 | -6185.46 | 2.02E-10 | 5.56E-09 |
| OTA005528 | <i>VIPAS39</i>  | -2734.27 | -2754.28 | 2.53E-10 | 6.91E-09 |
| OTA006603 | <i>TSC1</i>     | -5723.14 | -5742.75 | 3.80E-10 | 1.04E-08 |
| OTA013808 | <i>EFEMP1</i>   | -1555.13 | -1574.5  | 4.82E-10 | 1.31E-08 |
| OTA009326 | <i>MAP4K5</i>   | -2810.7  | -2830.05 | 4.92E-10 | 1.33E-08 |
| OTA012716 | <i>TTF2</i>     | -5646.61 | -5665.71 | 6.41E-10 | 1.72E-08 |
| OTA008266 |                 | -2150.31 | -2169.18 | 8.14E-10 | 2.18E-08 |
| OTA010703 | <i>APBA2</i>    | -3570.58 | -3589.09 | 1.17E-09 | 3.12E-08 |
| OTA014247 | <i>IVNS1ABP</i> | -3545.41 | -3563.79 | 1.33E-09 | 3.54E-08 |
| OTA001177 | <i>SPAG6</i>    | -1782.62 | -1800.77 | 1.71E-09 | 4.51E-08 |
| OTA013243 | <i>PSMG2</i>    | -1672.72 | -1690.83 | 1.75E-09 | 4.60E-08 |
| OTA002047 | <i>ZPR1</i>     | -2652.89 | -2670.9  | 1.95E-09 | 5.10E-08 |
| OTA013809 | <i>SMEK2</i>    | -2820.11 | -2838.05 | 2.10E-09 | 5.46E-08 |
| OTA013571 | <i>ILIR1</i>    | -2446.73 | -2464.65 | 2.16E-09 | 5.60E-08 |
| OTA015362 |                 | -2302.09 | -2319.92 | 2.34E-09 | 6.05E-08 |
| OTA001317 | <i>PRTFDC1</i>  | -857.46  | -875.149 | 2.72E-09 | 6.99E-08 |
| OTA012574 | <i>DES11</i>    | -913.314 | -930.522 | 4.45E-09 | 1.14E-07 |



|           |                  |          |          |          |          |
|-----------|------------------|----------|----------|----------|----------|
| OTA013087 |                  | -3784.78 | -3801.88 | 4.98E-09 | 1.27E-07 |
| OTA000552 | <i>ITGA11</i>    | -3897.14 | -3914.19 | 5.23E-09 | 1.33E-07 |
| OTA009301 |                  | -2140.58 | -2157.53 | 5.83E-09 | 1.47E-07 |
| OTA003577 | <i>CDK7</i>      | -1393.89 | -1410.72 | 6.56E-09 | 1.65E-07 |
| OTA012906 | <i>DSCAM</i>     | -3736.09 | -3752.75 | 7.81E-09 | 1.96E-07 |
| OTA003729 | <i>AQP2</i>      | -1095.93 | -1112.56 | 8.07E-09 | 2.01E-07 |
| OTA008185 | <i>PPP1R16B</i>  | -3031.4  | -3047.86 | 9.55E-09 | 2.37E-07 |
| OTA008045 | <i>SOAT1</i>     | -2696.37 | -2712.82 | 9.76E-09 | 2.42E-07 |
| OTA006935 | <i>GLB1L</i>     | -3077.06 | -3093.46 | 1.02E-08 | 2.51E-07 |
| OTA007281 | <i>FUCA1</i>     | -2474.24 | -2490.05 | 1.87E-08 | 4.59E-07 |
| OTA009783 | <i>HDAC7</i>     | -2694.49 | -2710.23 | 2.00E-08 | 4.90E-07 |
| OTA006478 | <i>CACHD1</i>    | -5399.06 | -5414.79 | 2.04E-08 | 4.97E-07 |
| OTA001021 | <i>ZNF423</i>    | -5909.87 | -5925.59 | 2.05E-08 | 4.98E-07 |
| OTA003858 | <i>C8H1orf27</i> | -2560.51 | -2576.05 | 2.46E-08 | 5.94E-07 |
| OTA006787 |                  | -2153.65 | -2168.78 | 3.76E-08 | 9.05E-07 |
| OTA014947 | <i>SPATA17</i>   | -1911.86 | -1926.82 | 4.51E-08 | 1.08E-06 |
| OTA002227 | <i>DENND2C</i>   | -3643.01 | -3657.92 | 4.76E-08 | 1.14E-06 |
| OTA007139 | <i>LEKR1</i>     | -1625.27 | -1640.12 | 5.06E-08 | 1.20E-06 |
| OTA008644 | <i>HOXA10</i>    | -1436.71 | -1451.34 | 6.35E-08 | 1.50E-06 |
| OTA008718 | <i>PLXNB2</i>    | -9941.78 | -9956.22 | 7.67E-08 | 1.81E-06 |
| OTA007434 | <i>PRIMPOL</i>   | -2650.1  | -2664.42 | 8.71E-08 | 2.05E-06 |
| OTA007769 | <i>MTG1</i>      | -1539.51 | -1553.77 | 9.31E-08 | 2.18E-06 |
| OTA006926 | <i>FAM171B</i>   | -4066.52 | -4080.71 | 9.91E-08 | 2.31E-06 |
| OTA010987 | <i>CACNA1H</i>   | -7088.44 | -7102.39 | 1.27E-07 | 2.96E-06 |
| OTA006618 | <i>ABCA2</i>     | -12253.3 | -12267.3 | 1.31E-07 | 3.02E-06 |
| OTA011527 | <i>GRPEL2</i>    | -1068.42 | -1082.27 | 1.42E-07 | 3.28E-06 |
| OTA014720 | <i>ZFAND5</i>    | -1459.51 | -1473.32 | 1.48E-07 | 3.39E-06 |
| OTA014547 | <i>DCT</i>       | -3760.61 | -3774.37 | 1.55E-07 | 3.56E-06 |
| OTA001329 | <i>DNAJB6</i>    | -1409.8  | -1423.48 | 1.69E-07 | 3.84E-06 |
| OTA014072 | <i>TAX1BP1</i>   | -4168.89 | -4182.48 | 1.86E-07 | 4.22E-06 |
| OTA013214 | <i>ADAD1</i>     | -2671.01 | -2684.58 | 1.89E-07 | 4.27E-06 |
| OTA006485 | <i>NSUN4</i>     | -2089.94 | -2103.45 | 2.02E-07 | 4.56E-06 |
| OTA000222 | <i>DHRS7</i>     | -1624.55 | -1638.02 | 2.12E-07 | 4.75E-06 |
| OTA008425 | <i>TBC1D22B</i>  | -2572.93 | -2586.34 | 2.24E-07 | 5.02E-06 |
| OTA011649 | <i>TCF7</i>      | -1101.19 | -1114.53 | 2.40E-07 | 5.36E-06 |
| OTA013810 | <i>MTIF2</i>     | -3988.06 | -4001.33 | 2.57E-07 | 5.70E-06 |
| OTA003076 | <i>GDPD4</i>     | -2928.23 | -2941.22 | 3.45E-07 | 7.62E-06 |
| OTA010229 |                  | -1309.78 | -1322.68 | 3.80E-07 | 8.37E-06 |
| OTA013369 | <i>TBC1D22A</i>  | -2509.58 | -2522.44 | 3.91E-07 | 8.59E-06 |
| OTA002582 | <i>MFSD8</i>     | -1964.24 | -1976.83 | 5.23E-07 | 1.14E-05 |
| OTA009060 | <i>SNAP91</i>    | -3421.84 | -3434.35 | 5.68E-07 | 1.24E-05 |
| OTA000619 | <i>HMCN2</i>     | -10061.6 | -10074.1 | 5.82E-07 | 1.26E-05 |
| OTA010926 | <i>RAC2</i>      | -857.531 | -869.907 | 6.52E-07 | 1.41E-05 |
| OTA001609 | <i>OSBPL6</i>    | -2896.61 | -2908.92 | 6.95E-07 | 1.50E-05 |
| OTA011481 | <i>PXK</i>       | -2127.53 | -2139.74 | 7.75E-07 | 1.67E-05 |
| OTA013827 | <i>MKKS</i>      | -3661.11 | -3673.3  | 7.91E-07 | 1.69E-05 |
| OTA011256 | <i>SMIM14</i>    | -472.192 | -484.261 | 8.97E-07 | 1.91E-05 |
| OTA011380 |                  | -3683.26 | -3695.29 | 9.35E-07 | 1.99E-05 |

|           |                |          |          |          |          |
|-----------|----------------|----------|----------|----------|----------|
| OTA009450 | <i>CHRNA5</i>  | -1891.23 | -1903.25 | 9.43E-07 | 2.00E-05 |
| OTA004110 | <i>EIF4B</i>   | -2281.28 | -2293.25 | 9.95E-07 | 2.10E-05 |
| OTA010209 | <i>FZD3</i>    | -1807.89 | -1819.76 | 1.11E-06 | 2.33E-05 |
| OTA012062 | <i>SEZ6L</i>   | -2371.82 | -2383.6  | 1.20E-06 | 2.51E-05 |
| OTA006590 | <i>C5</i>      | -7937.9  | -7949.52 | 1.43E-06 | 2.99E-05 |
| OTA001612 | <i>CSRNP3</i>  | -2907.52 | -2919.12 | 1.46E-06 | 3.03E-05 |
| OTA012852 | <i>BOC</i>     | -2320.3  | -2331.65 | 1.89E-06 | 3.93E-05 |
| OTA004766 | <i>SNCAIP</i>  | -5061.28 | -5072.38 | 2.47E-06 | 5.09E-05 |
| OTA011887 | <i>MFS11</i>   | -2368.58 | -2379.63 | 2.59E-06 | 5.32E-05 |
| OTA012037 | <i>ANAPC7</i>  | -2797.29 | -2808.32 | 2.66E-06 | 5.46E-05 |
| OTA003806 | <i>MINA</i>    | -2589.05 | -2600.05 | 2.73E-06 | 5.58E-05 |
| OTA011627 | <i>TCOF1</i>   | -3159.36 | -3170.21 | 3.19E-06 | 6.50E-05 |
| OTA010702 | <i>SLC24A1</i> | -3508.34 | -3519.05 | 3.70E-06 | 7.51E-05 |
| OTA000850 | <i>BTAF1</i>   | -8751.04 | -8761.66 | 4.06E-06 | 8.22E-05 |
| OTA009687 |                | -1580.52 | -1591.06 | 4.40E-06 | 8.89E-05 |
| OTA007737 | <i>PLAU</i>    | -1747.69 | -1758.11 | 5.02E-06 | 0.000101 |
| OTA008245 | <i>TFDP2</i>   | -2162.16 | -2172.55 | 5.18E-06 | 0.000104 |
| OTA002410 | <i>TMEM26</i>  | -2099.41 | -2109.66 | 5.94E-06 | 0.000119 |
| OTA002497 | <i>CYTH4</i>   | -2063.48 | -2073.69 | 6.24E-06 | 0.000124 |
| OTA007919 | <i>NEK1</i>    | -4807.08 | -4817.23 | 6.63E-06 | 0.000131 |
| OTA012718 | <i>DCBLD2</i>  | -2175.98 | -2186.07 | 7.06E-06 | 0.00014  |
| OTA013392 | <i>FAM185A</i> | -1219.26 | -1229.26 | 7.73E-06 | 0.000152 |
| OTA000810 |                | -799.672 | -809.55  | 8.79E-06 | 0.000173 |
| OTA011257 | <i>UGDH</i>    | -2879.06 | -2888.81 | 1.00E-05 | 0.000197 |
| OTA012747 | <i>KIF26B</i>  | -8833.28 | -8843.02 | 1.02E-05 | 0.000198 |
| OTA013328 | <i>MFS2B</i>   | -2439.53 | -2449.21 | 1.07E-05 | 0.000209 |
| OTA008519 | <i>PTPRJ</i>   | -6823.6  | -6832.71 | 1.96E-05 | 0.000381 |
| OTA007917 | <i>SH3D19</i>  | -3726.68 | -3735.7  | 2.16E-05 | 0.000417 |
| OTA009835 |                | -1841.94 | -1850.8  | 2.56E-05 | 0.000493 |
| OTA008250 | <i>SPHKAP</i>  | -8882.24 | -8891.07 | 2.66E-05 | 0.000512 |
| OTA015050 | <i>USP40</i>   | -6712.14 | -6720.88 | 2.92E-05 | 0.000559 |
| OTA008229 | <i>ZNF335</i>  | -6298.67 | -6307.26 | 3.42E-05 | 0.000653 |
| OTA005634 | <i>PMS2</i>    | -3698.55 | -3707.1  | 3.56E-05 | 0.000677 |
| OTA009395 | <i>RBPMS</i>   | -1226.4  | -1234.94 | 3.57E-05 | 0.000678 |
| OTA003587 | <i>TRERF1</i>  | -5646    | -5654.2  | 5.17E-05 | 0.000977 |
| OTA006564 | <i>RAB14</i>   | -788.115 | -796.298 | 5.23E-05 | 0.000985 |
| OTA012263 |                | -2191.79 | -2199.86 | 5.90E-05 | 0.001109 |
| OTA012613 | <i>RPL23A</i>  | -830.626 | -838.656 | 6.13E-05 | 0.001149 |
| OTA014681 | <i>DENND4C</i> | -10068.3 | -10076.3 | 6.28E-05 | 0.001173 |
| OTA006951 | <i>ABCB11</i>  | -7010.65 | -7018.63 | 6.42E-05 | 0.001194 |
| OTA015624 | <i>GRIN3A</i>  | -2366.21 | -2374.19 | 6.44E-05 | 0.001194 |
| OTA000221 | <i>UBR7</i>    | -2218.67 | -2226.59 | 6.90E-05 | 0.001276 |
| OTA009143 | <i>NIT2</i>    | -526.151 | -533.994 | 7.47E-05 | 0.001378 |
| OTA011119 | <i>EXOC3L1</i> | -3770.19 | -3777.89 | 8.73E-05 | 0.001605 |
| OTA008901 | <i>LANCL1</i>  | -2219.95 | -2227.61 | 9.10E-05 | 0.001667 |
| OTA011290 | <i>NELFA</i>   | -1938.05 | -1945.68 | 9.38E-05 | 0.001714 |
| OTA014129 | <i>CEP290</i>  | -12769   | -12776.5 | 0.000116 | 0.002111 |
| OTA007048 | <i>POP1</i>    | -5869.34 | -5876.76 | 0.000117 | 0.002124 |

|           |                  |          |          |          |           |
|-----------|------------------|----------|----------|----------|-----------|
| OTA014918 | <i>GALNT2</i>    | -2580.07 | -2587.43 | 0.000124 | 0.002253  |
| OTA011445 | <i>GLT8D1</i>    | -1790.4  | -1797.49 | 0.000166 | 0.002994  |
| OTA013896 | <i>MEF2D</i>     | -1242.77 | -1249.86 | 0.000167 | 0.002998  |
| OTA002617 | <i>SLC7A11</i>   | -2243.11 | -2250.17 | 0.000172 | 0.003087  |
| OTA004797 | <i>ATP2A3</i>    | -4718.1  | -4725.13 | 0.000177 | 0.003168  |
| OTA005475 | <i>MTHFD1</i>    | -4832.76 | -4839.75 | 0.000186 | 0.003314  |
| OTA006213 | <i>SSBP3</i>     | -650.196 | -657.161 | 0.00019  | 0.003376  |
| OTA002316 | <i>RBM19</i>     | -4279.6  | -4286.53 | 0.000197 | 0.00349   |
| OTA005402 | <i>CDAN1</i>     | -3590.31 | -3597.24 | 0.000198 | 0.003495  |
| OTA006861 | <i>METTL8</i>    | -1398.68 | -1405.49 | 0.000224 | 0.003949  |
| OTA001833 | <i>PLEKHN1</i>   | -1140.55 | -1147.31 | 0.000236 | 0.00415   |
| OTA010764 | <i>NOLC1</i>     | -3615.73 | -3622.47 | 0.000241 | 0.004216  |
| OTA014664 | <i>WDR26</i>     | -2722.88 | -2729.56 | 0.000257 | 0.004488  |
| OTA011504 | <i>CELSR3</i>    | -19442.3 | -19448.9 | 0.000258 | 0.004492  |
| OTA014570 | <i>PPAP2A</i>    | -1427.36 | -1433.97 | 0.000276 | 0.0048    |
| OTA005097 | <i>TRPV5</i>     | -3377.99 | -3384.59 | 0.000279 | 0.004829  |
| OTA014665 | <i>TP53BP2</i>   | -4988.96 | -4995.42 | 0.000323 | 0.00558   |
| OTA009242 | <i>CEP57L1</i>   | -2178.85 | -2185.31 | 0.000326 | 0.005609  |
| OTA004492 | <i>ERICH3</i>    | -1322.61 | -1329.06 | 0.00033  | 0.005668  |
| OTA014546 | <i>GGACT</i>     | -793.297 | -799.638 | 0.000369 | 0.006318  |
| OTA009741 | <i>CHRNA3</i>    | -2345.23 | -2351.41 | 0.000436 | 0.00744   |
| OTA007413 | <i>EGF</i>       | -5960.06 | -5966.05 | 0.00054  | 0.009185  |
| OTA010577 | <i>AP3B2</i>     | -5070.61 | -5076.54 | 0.000574 | 0.009748  |
| OTA013692 |                  | -1264.87 | -1270.69 | 0.000645 | 0.010927  |
| OTA001103 | <i>GABARAPL2</i> | -483.323 | -489.14  | 0.000648 | 0.010943  |
| OTA007396 | <i>CDKN2AIP</i>  | -2367.27 | -2373.06 | 0.000667 | 0.011228  |
| OTA002126 | <i>RFX6</i>      | -4881.74 | -4887.5  | 0.000688 | 0.011545  |
| OTA003231 | <i>SGSM2</i>     | -5693.46 | -5699.17 | 0.000728 | 0.012192  |
| OTA015245 | <i>RIOK2</i>     | -3058.56 | -3064.16 | 0.000824 | 0.01375   |
| OTA008459 | <i>CHAF1A</i>    | -5147.37 | -5152.94 | 0.000848 | 0.014115  |
| OTA004943 | <i>HABP4</i>     | -1627.11 | -1632.59 | 0.000936 | 0.015545  |
| OTA002298 | <i>GNAT2</i>     | -902.224 | -907.635 | 0.001003 | 0.0166    |
| OTA000205 | <i>WDR25</i>     | -1297.06 | -1302.46 | 0.001017 | 0.01679   |
| OTA006533 | <i>WDR34</i>     | -1337.58 | -1342.96 | 0.001035 | 0.017037  |
| OTA006473 | <i>VCAM1</i>     | -3059.97 | -3065.17 | 0.001264 | 0.020749  |
| OTA000041 | <i>ZFYVE1</i>    | -3502.99 | -3508.17 | 0.001288 | 0.021097  |
| OTA005112 | <i>RFESD</i>     | -983.014 | -988.127 | 0.001384 | 0.022604  |
| OTA013961 | <i>CDC123</i>    | -1593.84 | -1598.86 | 0.001537 | 0.02503   |
| OTA005822 | <i>IMMT</i>      | -4093.4  | -4098.4  | 0.001579 | 0.025643  |
| OTA006517 | <i>PRPF4</i>     | -2371.83 | -2376.64 | 0.001934 | 0.031327  |
| OTA007762 | <i>ADAM8</i>     | -2312.51 | -2317.21 | 0.002186 | 0.035314  |
| OTA000103 | <i>ZC3H14</i>    | -3127.65 | -3132.31 | 0.002273 | 0.036618  |
| OTA000715 | <i>OLFM1</i>     | -1769.16 | -1773.77 | 0.002409 | 0.03871   |
| OTA006810 | <i>ITGB1BP2</i>  | -1757.44 | -1762.01 | 0.002497 | 0.040009  |
| OTA013666 | <i>BRPF3</i>     | -5295.75 | -5300.28 | 0.002617 | 0.041826  |
| OTA001275 | <i>MALRD1</i>    | -764.921 | -769.434 | 0.002662 | 0.042424  |
| OTA011313 |                  | -1864.01 | -1868.49 | 0.002774 | 0.04v4093 |

Table S13. Functional impacts of snowfinch-specific *DTL* nonsynonymous substitutions as compared to those of *montan*. The nonsynonymous substitutions caused potential functional changes are shown in bold.

| Species         | Variant | <i>Montan</i> | Snowfinch        | Provean                               | Sift                                  |
|-----------------|---------|---------------|------------------|---------------------------------------|---------------------------------------|
| <i>adamsi</i>   | T83S    | T             | S                | 0.605 (Neutral)                       | 0.88 (Tolerated)                      |
|                 | V437M   | V             | M                | -0.193 (Neutral)                      | 0.11 (Tolerated)                      |
|                 | S599P   | S             | P                | -1.484 (Neutral)                      | 0.28 (Tolerated)                      |
|                 | P639T   | P             | T                | -0.225 (Neutral)                      | <b>0 (Affect protein function)</b>    |
|                 | R646H   | R             | H                | -0.852 (Neutral)                      | 0.22 (Tolerated)                      |
| <i>rufico</i>   | T53A    | T             | A                | -0.569 (Neutral)                      | 0.53 (Tolerated)                      |
|                 | P480R   | P             | R                | 1.007 (Neutral)                       | 0.78 (Tolerated)                      |
|                 | P544L   | P             | L                | -2.085 (Neutral)                      | 0.12 (Tolerated)                      |
|                 | E561D   | E             | D                | -0.486 (Neutral)                      | 0.49 (Tolerated)                      |
| <i>taczan</i>   | N59D    | N             | D                | -1.664 (Neutral)                      | 0.5 (Tolerated)                       |
|                 | I132V   | I             | V                | 0.296 (Neutral)                       | 1 (Tolerated)                         |
|                 | D190N   | D             | N                | -1.227 (Neutral)                      | 0.16 (Tolerated)                      |
|                 | R389C   | R             | C                | -2.275 (Neutral)                      | <b>0 (Affect protein function)</b>    |
|                 | E394G   | E             | G                | <b>-2.67 (Deleterious)</b>            | 0.23 (Tolerated)                      |
|                 | G417A   | G             | A                | 0.479 (Neutral)                       | 0.93 (Tolerated)                      |
|                 | A418T   | A             | T                | -0.201 (Neutral)                      | 0.3 (Tolerated)                       |
|                 | P506L   | P             | L                | <b>-3.105 (Deleterious)</b>           | <b>0 (Affect protein function)</b>    |
|                 | E549G   | E             | G                | -1.822 (Neutral)                      | <b>0.05 (Affect protein function)</b> |
|                 | K553R   | K             | R                | -1.494 (Neutral)                      | <b>0 (Affect protein function)</b>    |
|                 | S585P   | S             | P                | -0.601 (Neutral)                      | 0.26 (Tolerated)                      |
|                 | K586S   | K             | S                | -0.897 (Neutral)                      | <b>0.04 (Affect protein function)</b> |
|                 | H591N   | H             | N                | 0.4 (Neutral)                         | 0.77 (Tolerated)                      |
|                 | L606R   | L             | R                | -1.791 (Neutral)                      | 0.06 (Tolerated)                      |
| R662N           | R       | N             | -0.175 (Neutral) | 0.84 (Tolerated)                      |                                       |
| R686N           | R       | N             | 0.5 (Neutral)    | 0.11 (Tolerated)                      |                                       |
| <i>ancestor</i> | K45T    | K             | T                | 0.68 (Neutral)                        | 0.34 (Tolerated)                      |
|                 | M163L   | M             | L                | -1.56 (Neutral)                       | 0.81 (Tolerated)                      |
|                 | V188M   | V             | M                | -0.979 (Neutral)                      | 0.08 (Tolerated)                      |
|                 | Q312R   | Q             | R                | -1.909 (Neutral)                      | 0.31 (Tolerated)                      |
|                 | V330L   | V             | L                | -0.166 (Neutral)                      | 0.42 (Tolerated)                      |
|                 | T338V   | T             | V                | -0.602 (Neutral)                      | 1 (Tolerated)                         |
|                 | V397G   | V             | G                | -0.318 (Neutral)                      | 0.5 (Tolerated)                       |
|                 | E413K   | E             | K                | -0.631 (Neutral)                      | 0.24 (Tolerated)                      |
|                 | G414Q   | G             | Q                | 1.307 (Neutral)                       | 0.57 (Tolerated)                      |
|                 | P428L   | P             | L                | <b>-3.107 (Deleterious)</b>           | 0.58 (Tolerated)                      |
|                 | C438R   | C             | R                | 0.107 (Neutral)                       | 0.26 (Tolerated)                      |
| T450I           | T       | I             | -1.496 (Neutral) | <b>0.01 (Affect protein function)</b> |                                       |

|       |   |   |                  |                                       |
|-------|---|---|------------------|---------------------------------------|
|       |   |   |                  | <b>function)</b>                      |
| P462A | P | A | -1.542 (Neutral) | <b>0 (Affect protein function)</b>    |
| S471T | S | T | -0.125 (Neutral) | 0.12 (Tolerated)                      |
| H500Y | H | Y | -1.405 (Neutral) | 0.06 (Tolerated)                      |
| G533D | G | D | 0.216 (Neutral)  | 0.73 (Tolerated)                      |
| K550T | K | T | -0.243 (Neutral) | 0.06 (Tolerated)                      |
| H580N | H | N | 0.434 (Neutral)  | 1 (Tolerated)                         |
| A582D | A | D | -1.092 (Neutral) | <b>0.03 (Affect protein function)</b> |
| D640R | D | R | 0.943 (Neutral)  | 0.27 (Tolerated)                      |
| F642C | F | C | 0.104 (Neutral)  | <b>0.01 (Affect protein function)</b> |
| K648Q | K | Q | -0.022 (Neutral) | 0.25 (Tolerated)                      |
| E671A | E | A | 0.001 (Neutral)  | 0.35 (Tolerated)                      |
| A710L | A | L | 0.037 (Neutral)  | 0.16 (Tolerated)                      |
| A711L | A | L | -0.27 (Neutral)  | 0.32 (Tolerated)                      |
| M717V | M | V | -1.381 (Neutral) | <b>0 (Affect protein function)</b>    |

---

Table S14. Statistical results of pairwise comparisons of snowfinch *DTLs*. T-tests combined with FDR correction. \*,  $P < 0.05$ ; \*\*,  $P < 0.01$ ; \*\*\*,  $P < 0.001$ .

| 6-4PP | 1.5 h/6 h                    | <i>DTL</i> <sub>ancestor</sub> | <i>DTL</i> <sub>adamsi</sub> | <i>DTL</i> <sub>rufico</sub> |
|-------|------------------------------|--------------------------------|------------------------------|------------------------------|
|       | <i>DTL</i> <sub>adamsi</sub> | **/**                          |                              |                              |
|       | <i>DTL</i> <sub>rufico</sub> | **/**                          | **/*                         |                              |
|       | <i>DTL</i> <sub>taczan</sub> | */0.26                         | **/**                        | **/0.25                      |
| CPD   | 6 h/24 h                     | <i>DTL</i> <sub>ancestor</sub> | <i>DTL</i> <sub>adamsi</sub> | <i>DTL</i> <sub>rufico</sub> |
|       | <i>DTL</i> <sub>adamsi</sub> | */0.92                         |                              |                              |
|       | <i>DTL</i> <sub>rufico</sub> | */0.92                         | 0.61/0.92                    |                              |
|       | <i>DTL</i> <sub>taczan</sub> | */0.92                         | 0.59/0.92                    | 0.2/0.56                     |

Table S15. Phylogenetic signal test for adaptive characteristics in the three descendant species.

| Adaptive characteristics                                 | Blomberg's <i>K</i> | <i>P</i> value |
|----------------------------------------------------------|---------------------|----------------|
| Semantic similarity values (RCMAX)                       | 1.039               | 0.343          |
| Semantic similarity values (BMA)                         | 1.041               | 0.325          |
| <i>DTL</i> nonsynonymous substitution in Non-WD40 region | 1.048               | 0.344          |
| <i>DTL</i> nonsynonymous substitution in WD40 region     | 1.049               | 0.318          |
| DNA repair capacity at 1.5 h (6-4PP)                     | 0.952               | 1.000          |
| DNA repair capacity at 6 h (6-4PP)                       | 0.985               | 0.657          |
| DNA repair capacity at 6 h (CPD)                         | 0.997               | 0.661          |
| DNA repair capacity at 24 h (CPD)                        | 0.989               | 0.638          |

Table S16. Functional impacts of four alternative variants of inferred ancestral *DTL* sequences.

| Variants | <i>DTL</i> <sub>ancestor_1</sub> | <i>DTL</i> <sub>ancestor_2</sub> | <i>DTL</i> <sub>ancestor</sub> | PolyPhen-2    | Provean          |
|----------|----------------------------------|----------------------------------|--------------------------------|---------------|------------------|
| T472R    | T                                | R                                | T                              | 0.40 (Benign) | -0.532 (Neutral) |
| L566P    | L                                | P                                | P                              | 0.01 (Benign) | -1.519 (Neutral) |
| H586N    | H                                | H                                | N                              | 0.03 (Benign) | 0.076 (Neutral)  |
| Y605C    | Y                                | C                                | Y                              | 0.00 (Benign) | 0.585 (Neutral)  |



Table S17. Proportions of repeats in the genomes of the three species of snowfinches.

| Type                     | White-rumped Snowfinch |             | Black-winged Snowfinch |             | Rufous-necked Snowfinch |             |
|--------------------------|------------------------|-------------|------------------------|-------------|-------------------------|-------------|
|                          | Repeat Size(bp)        | % of genome | Repeat Size(bp)        | % of genome | Repeat Size(bp)         | % of genome |
| <i>TRF</i>               | 32,808,224             | 3.16        | 29,493,038             | 2.80        | 29,559,512              | 2.81        |
| <i>RepeatMasker</i>      | 63,386,645             | 6.11        | 69,799,001             | 6.63        | 68,872,029              | 6.55        |
| <i>RepeatProteinMask</i> | 26,239,030             | 2.53        | 31,021,768             | 2.95        | 30,732,968              | 2.92        |
| <i>De Novo</i>           | 77,428,015             | 7.46        | 91,048,124             | 8.65        | 86,608,645              | 8.23        |
| Total                    | 113,021,890            | 10.89       | 122,922,653            | 11.67       | 119,950,493             | 11.40       |

Table S18. Comparison transposable elements of the genomes in the three species of snowfinches.

| Type          | White-rumped Snowfinch |             | Black-winged Snowfinch |             | Rufous-necked Snowfinch |             |
|---------------|------------------------|-------------|------------------------|-------------|-------------------------|-------------|
|               | Length (bp)            | % in genome | Length (bp)            | % in genome | Length (bp)             | % in genome |
| DNA           | 4,048,441              | 0.39        | 4,215,590              | 0.4         | 3,748,454               | 0.36        |
| LINE          | 49,927,044             | 4.81        | 49,797,281             | 4.73        | 49,288,476              | 4.69        |
| SINE          | 24,333                 | 0           | 90,735                 | 0.01        | 51,452                  | 0           |
| LTR           | 20,227,074             | 1.95        | 36,065,547             | 3.42        | 31,318,798              | 2.98        |
| Other         | 0                      | 0           | 0                      | 0           | 0                       | 0           |
| Satellite     | 2,501,301              | 0.24        | 2,774,732              | 0.26        | 2,005,983               | 0.19        |
| Simple repeat | 1,247,570              | 0.12        | 1,984,824              | 0.19        | 1,848,477               | 0.18        |
| Unknown       | 3,302,048              | 0.32        | 3,311,783              | 0.31        | 3,631,406               | 0.35        |
| Total         | 77,428,015             | 7.46        | 91,048,124             | 8.65        | 86,608,645              | 8.23        |

Table S19. Summary of predicted RNA genes and their characteristics.

| Type                    |          | Copy (w) | Average length(bp) | Total length(bp) | % of genome |
|-------------------------|----------|----------|--------------------|------------------|-------------|
| White-rumped Snowfinch  |          |          |                    |                  |             |
|                         | miRNA    | 194      | 83.08              | 16,118.00        | 0.001553    |
|                         | tRNA     | 275      | 74.80              | 20,571.00        | 0.001982    |
| rRNA                    | rRNA     | 41       | 184.07             | 7,547.00         | 0.000727    |
|                         | 18S      | 7        | 268.71             | 1,881.00         | 0.000181    |
|                         | 28S      | 29       | 180.76             | 5,242.00         | 0.000505    |
|                         | 5.8S     | 1        | 155.00             | 155.00           | 0.000015    |
|                         | 5S       | 4        | 67.25              | 269.00           | 0.000026    |
| snRNA                   | snRNA    | 217      | 116.28             | 25,232.00        | 0.002432    |
|                         | CD-box   | 105      | 87.71              | 9,210.00         | 0.000888    |
|                         | HACA-box | 68       | 141.07             | 9,593.00         | 0.000924    |
|                         | Splicing | 29       | 128.38             | 3,723.00         | 0.000359    |
| Black-winged Snowfinch  |          |          |                    |                  |             |
|                         | miRNA    | 193      | 83.09              | 16,036           | 0.001523    |
|                         | tRNA     | 279      | 74.74              | 20,853           | 0.00198     |
| rRNA                    | rRNA     | 38       | 139.84             | 5,314            | 0.000505    |
|                         | 18S      | 6        | 328.33             | 1,970            | 0.000187    |
|                         | 28S      | 26       | 106.81             | 2,777            | 0.000264    |
|                         | 5.8S     | 1        | 155.00             | 155              | 0.000015    |
|                         | 5S       | 5        | 82.40              | 412              | 0.000039    |
| snRNA                   | snRNA    | 202      | 117.21             | 23,676           | 0.002248    |
|                         | CD-box   | 103      | 91.04              | 9,377            | 0.00089     |
|                         | HACA-box | 61       | 137.97             | 8,416            | 0.000799    |
|                         | Splicing | 26       | 135.65             | 3,527            | 0.000335    |
| Rufous-necked Snowfinch |          |          |                    |                  |             |
|                         | miRNA    | 200      | 82.64              | 16,527           | 0.001571    |
|                         | tRNA     | 298      | 74.77              | 22,282           | 0.002119    |
| rRNA                    | rRNA     | 105      | 158.35             | 16,627           | 0.001581    |
|                         | 18S      | 29       | 186.28             | 5,402            | 0.000514    |
|                         | 28S      | 70       | 154.39             | 10,807           | 0.001028    |
|                         | 5.8S     | 3        | 84.00              | 252              | 0.000024    |
|                         | 5S       | 3        | 55.33              | 166              | 0.000016    |
| snRNA                   | snRNA    | 241      | 112.81             | 27,187           | 0.002585    |
|                         | CD-box   | 123      | 85.94              | 10,571           | 0.001005    |
|                         | HACA-box | 72       | 140.26             | 10,099           | 0.00096     |
|                         | Splicing | 31       | 125.32             | 3,885            | 0.000369    |

## References:

1. R. Li, Y. Li, K. Kristiansen, J. Wang, SOAP: Short oligonucleotide alignment program. *Bioinformatics* **24**, 713–714 (2008).
2. M. Boetzer, C. V. Henkel, H. J. Jansen, D. Butler, W. Pirovano, Scaffolding preassembled contigs using SSPACE. *Bioinformatics* **27**, 578–579 (2011).
3. F. A. Simao, R. M. Waterhouse, R. Ioannidis, E. V. Kriventseva, E. M. Zdobnov, BUSCO: assessing genome assembly and annotation completeness with single-copy orthologs. *Bioinformatics* **31**, 3210–3212 (2015).
4. H. Li, D. Richard, Fast and accurate short read alignment with Burrows–Wheeler transform. *Bioinformatics* **25**, 141754–141760 (2009).
5. W. J. Kent, BLAT-the BLAST-like alignment tool. *Genome Res.* **12**, 656–664 (2002).
6. E. Birney, M. Clamp, R. Durbin, Genewise and genomewise. *Genome Res.* **14**, 988–995 (2004).
7. D. Kim, B. Langmead, S. L. Salzberg, HISAT: a fast spliced aligner with low memory requirements. *Nat. Method.* **12**, 357–360 (2015).
8. M. Perteza *et al.*, StringTie enables improved reconstruction of a transcriptome from RNA-seq reads. *Nat. Biotechnol.* **33**, 290–295 (2015).
9. C. G. Elsik *et al.*, Creating a honey bee consensus gene set. *Genome Biol.* **8**, R13 (2007).
10. M. Ashburner *et al.*, Gene ontology: tool for the unification of biology. The Gene Ontology Consortium. *Nat. Genet.* **25**, 25–29 (2000).
11. M. Kanehisa, S. Goto, KEGG: Kyoto encyclopedia of genes and genomes. *Nucleic Acids Res.* **28**, 27–30 (2000).
12. H. Li *et al.*, TreeFam: a curated database of phylogenetic trees of animal gene families. *Nucleic Acids Res.* **34**, D572–D580 (2006).
13. P. Shah, B. Zhao, L. Qiang, Y. Y. He, Phosphorylation of xeroderma pigmentosum group C regulates ultraviolet-induced DNA damage repair. *Nucleic acids research* **46**, 5050–5060 (2018).
